# Supplementary material for: A parabrachial-hypothalamic parallel circuit governs cold defense in mice
Source: PubMed Central journal article supplement (PMC10427655; doi:10.1038/s41467-023-40504-6), 2023-08-15
Supplement: 41467_2023_40504_MOESM1_ESM.pdf [file 41467_2023_40504_MOESM1_ESM.pdf]

## **Supplementary Fig. 1 | Projections of LPB glutamatergic neurons throughout the brain.**

(a) The axonal projection pattern of LPB glutamatergic neurons throughout the brain, revealed by anterograde tracing AAVs. Injection sites of AAV9-DIO-ChR2-eYFP in the LPB are indicated in the figure. Thicker lines indicate stronger eYFP expression.

(b) Representative images are showing ChR2-eYFP expression in the injection sites. This experiment was repeated at least 10 times independently with similar results.

(c) Representative images are showing ChR2-eYFP expression in axonal terminals at various brain sites. This experiment was repeated at least 10 times independently with similar results.

B, bregma; LPBC, lateral parabrachial nucleus, central part; LPBD, lateral parabrachial nucleus, dorsal part; LPBE, lateral parabrachial nucleus, external part; LPBV, lateral parabrachial nucleus, ventral part; LPBI, lateral parabrachial nucleus, internal part; LDTg, laterodorsal tegmental nucleus; LDTgV, laterodorsal tegmental nucleus, ventral part; KF, Kolliker-Fuse nucleus; MPB, medial parabrachial nucleus; LC, locus coeruleus; MVeMC, medial vestibular nucleus, magnocellular part; MVePC, medial vestibular nucleus, parvicellular part; icp, inferior cerebellar peduncle; scp, superior cerebellar peduncle; SuVe, superior vestibular nucleus. PAG, periaqueductal gray matter; SC, superior colliculus; RVM, rostral ventromedial medulla; PnO, the oral part of pontine reticular nucleus; TH, thalamus; Po, posterior thalamic nuclear group; POA, preoptic nucleus; PaF, parafascicular thalamic nucleus; SPF, subparafascicular thalamic nucleus; VPM, ventral posteromedial thalamic; ZID, zona incerta, dorsal part; DLPAG, dorsolateral periaqueductal gray; DMPAG, dorsomedial periaqueductal gray; LPAG, lateral periaqueductal gray; InG, intermediate gray layer of the superior colliculus; InWh, intermediate white layer of the superior colliculus; DpG, deep gray layer of the superior colliculus; Gi, gigantocellular reticular nucleus; GiA, gigantocellular reticular nucleus, alpha part; LPGi, lateral paragigantocellular nucleus; rmg, raphe magnus nucleus; LPO, lateral preoptic area; StHY, striohypothalamic nucleus; MPA, medial preoptic area; MPOM, medial preoptic nucleus, medial part; SIB, substantia innominata, basal part; HDB, nucleus of the horizontal limb of the diagonal band; D3V, dorsal 3rd ventricle; PVT, paraventricular thalamic nucleus.

# Supplementary Fig. 2 | Mapping the collateral projections of LPB<sup>Vglut2</sup> neurons to the POA (MnPO & VMPO) and the DMH.

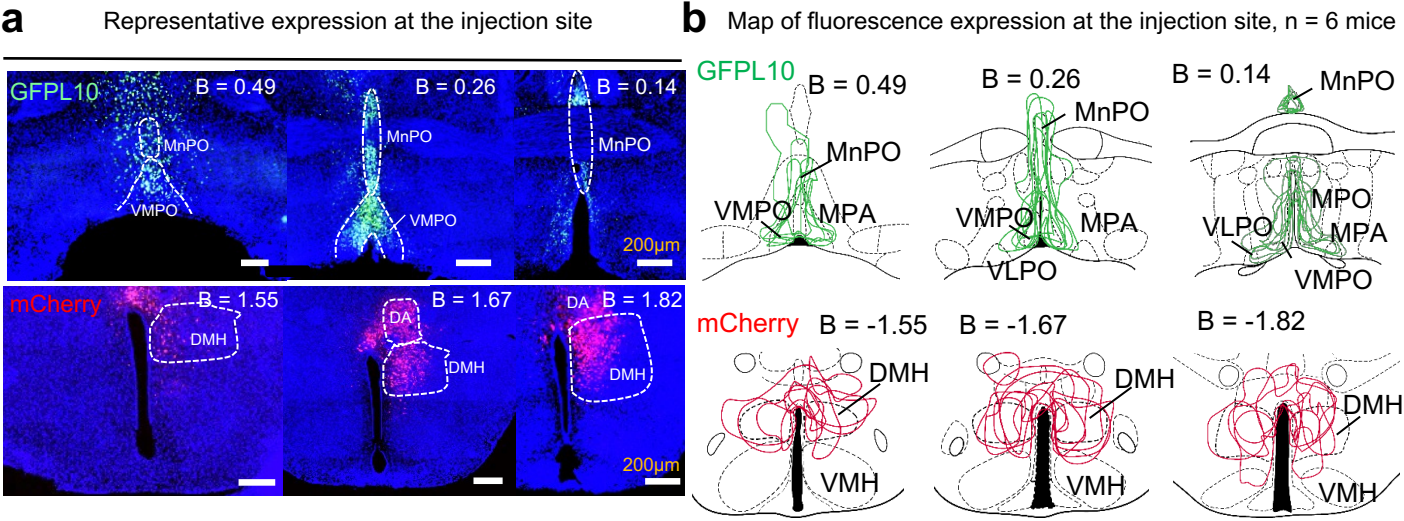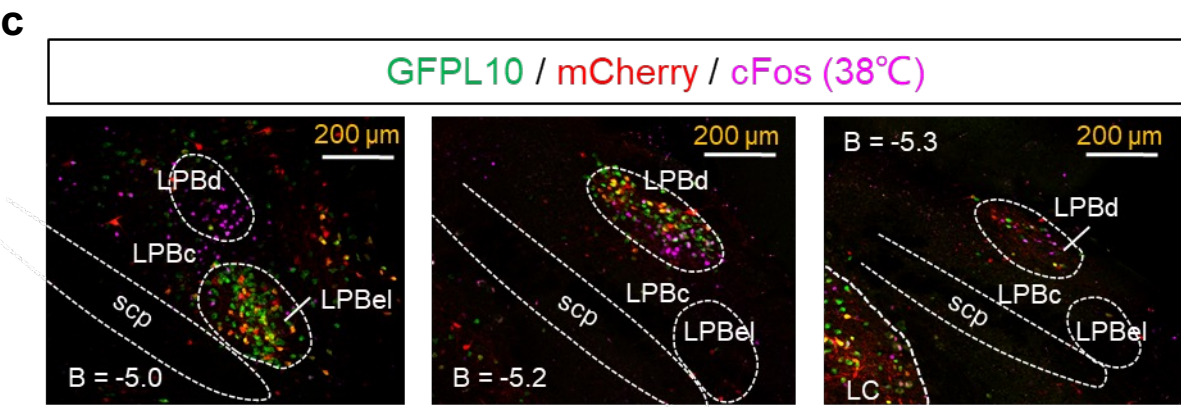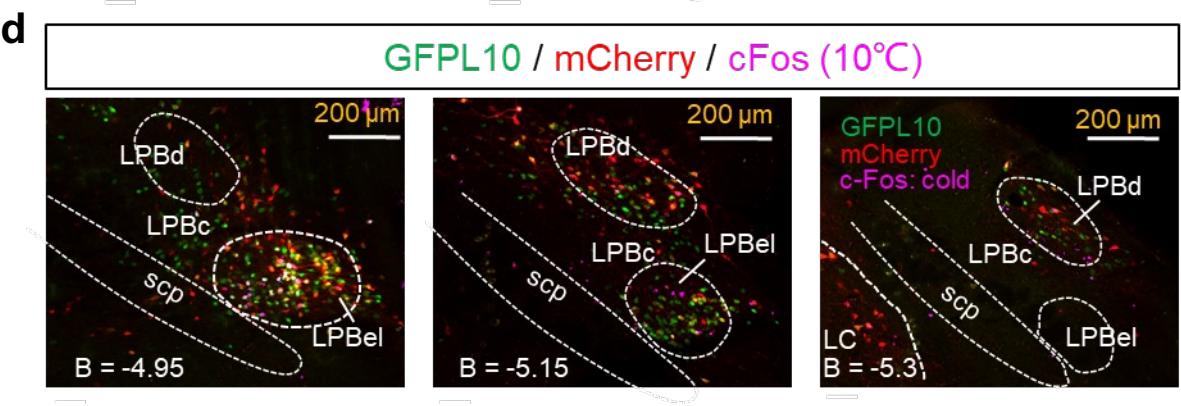

## Supplementary Fig. 2 | Mapping the collateral projections of LPB<sup>Vglut2</sup> neurons to the POA (MnPO & VMPO) and the DMH.

(a) Representative expression of GFP (AAV-Retro-DIO-GFPL10) and mCherry (AAV-Retro-DIO-mCherry) in the injection sites. AAV-Retro-DIO-GFPL10 was injected in the VMPO & MnPO of Vglut2-IRES-Cre mice (n = 6 mice) and AAV-Retro-DIO-mCherry was injected in the DMH of Vglut2-IRES-Cre mice (n = 6 mice). The expression boundaries of each mouse were overlaid in the right as indicated.

(b) Map of fluorescence expression at the injection sites from (a). The expression boundaries of each mouse were overlaid and showed together as indicated (n = 6 mice).

(c) Representative images showing the overlapping between POA- and DMH-projecting LPB<sup>Vglut2</sup> neurons and warm-activated cFos at different bregma sites. Mice were exposed to warm stimuli (38°C, 2 hrs) before sacrificing for cFos immunostaining. The overlapping ratios were indicated in Fig. 1e. A total of 924 cFos<sup>+</sup> neurons from 3 mice were scored.

(d) Representative images showing the overlapping between POA/DMH-projecting LPB neurons and cold-activated cFos immunoactivity at different bregma sites. Mice were exposed to cold stimuli (10°C, 2 hrs) before sacrificing for cFos immunostaining. The overlapping ratios were indicated in Fig. 1g. A total of 693 cFos<sup>+</sup> neurons from 3 mice were scored.

B, bregma; LPBc, lateral parabrachial nucleus, central part; LPBd, lateral parabrachial nucleus, dorsal part; LPBel, lateral parabrachial nucleus, external and internal part; LC, locus coeruleus; scp, superior cerebellar peduncle; DMH, dorsomedial hypothalamus nucleus; DA, dorsal hypothalamus area; VMH, ventromedial hypothalamus nucleus; MnPO, median preoptic area; VLPO, ventrolateral preoptic area; MPA, medial preoptic area; MPO, medial preoptic nucleus; VMPO, ventromedial preoptic area.

**Supplementary Fig. 3 | Projection pattern of DMH-projecting LPB<sup>Vglut2</sup> neurons throughout the brain.**

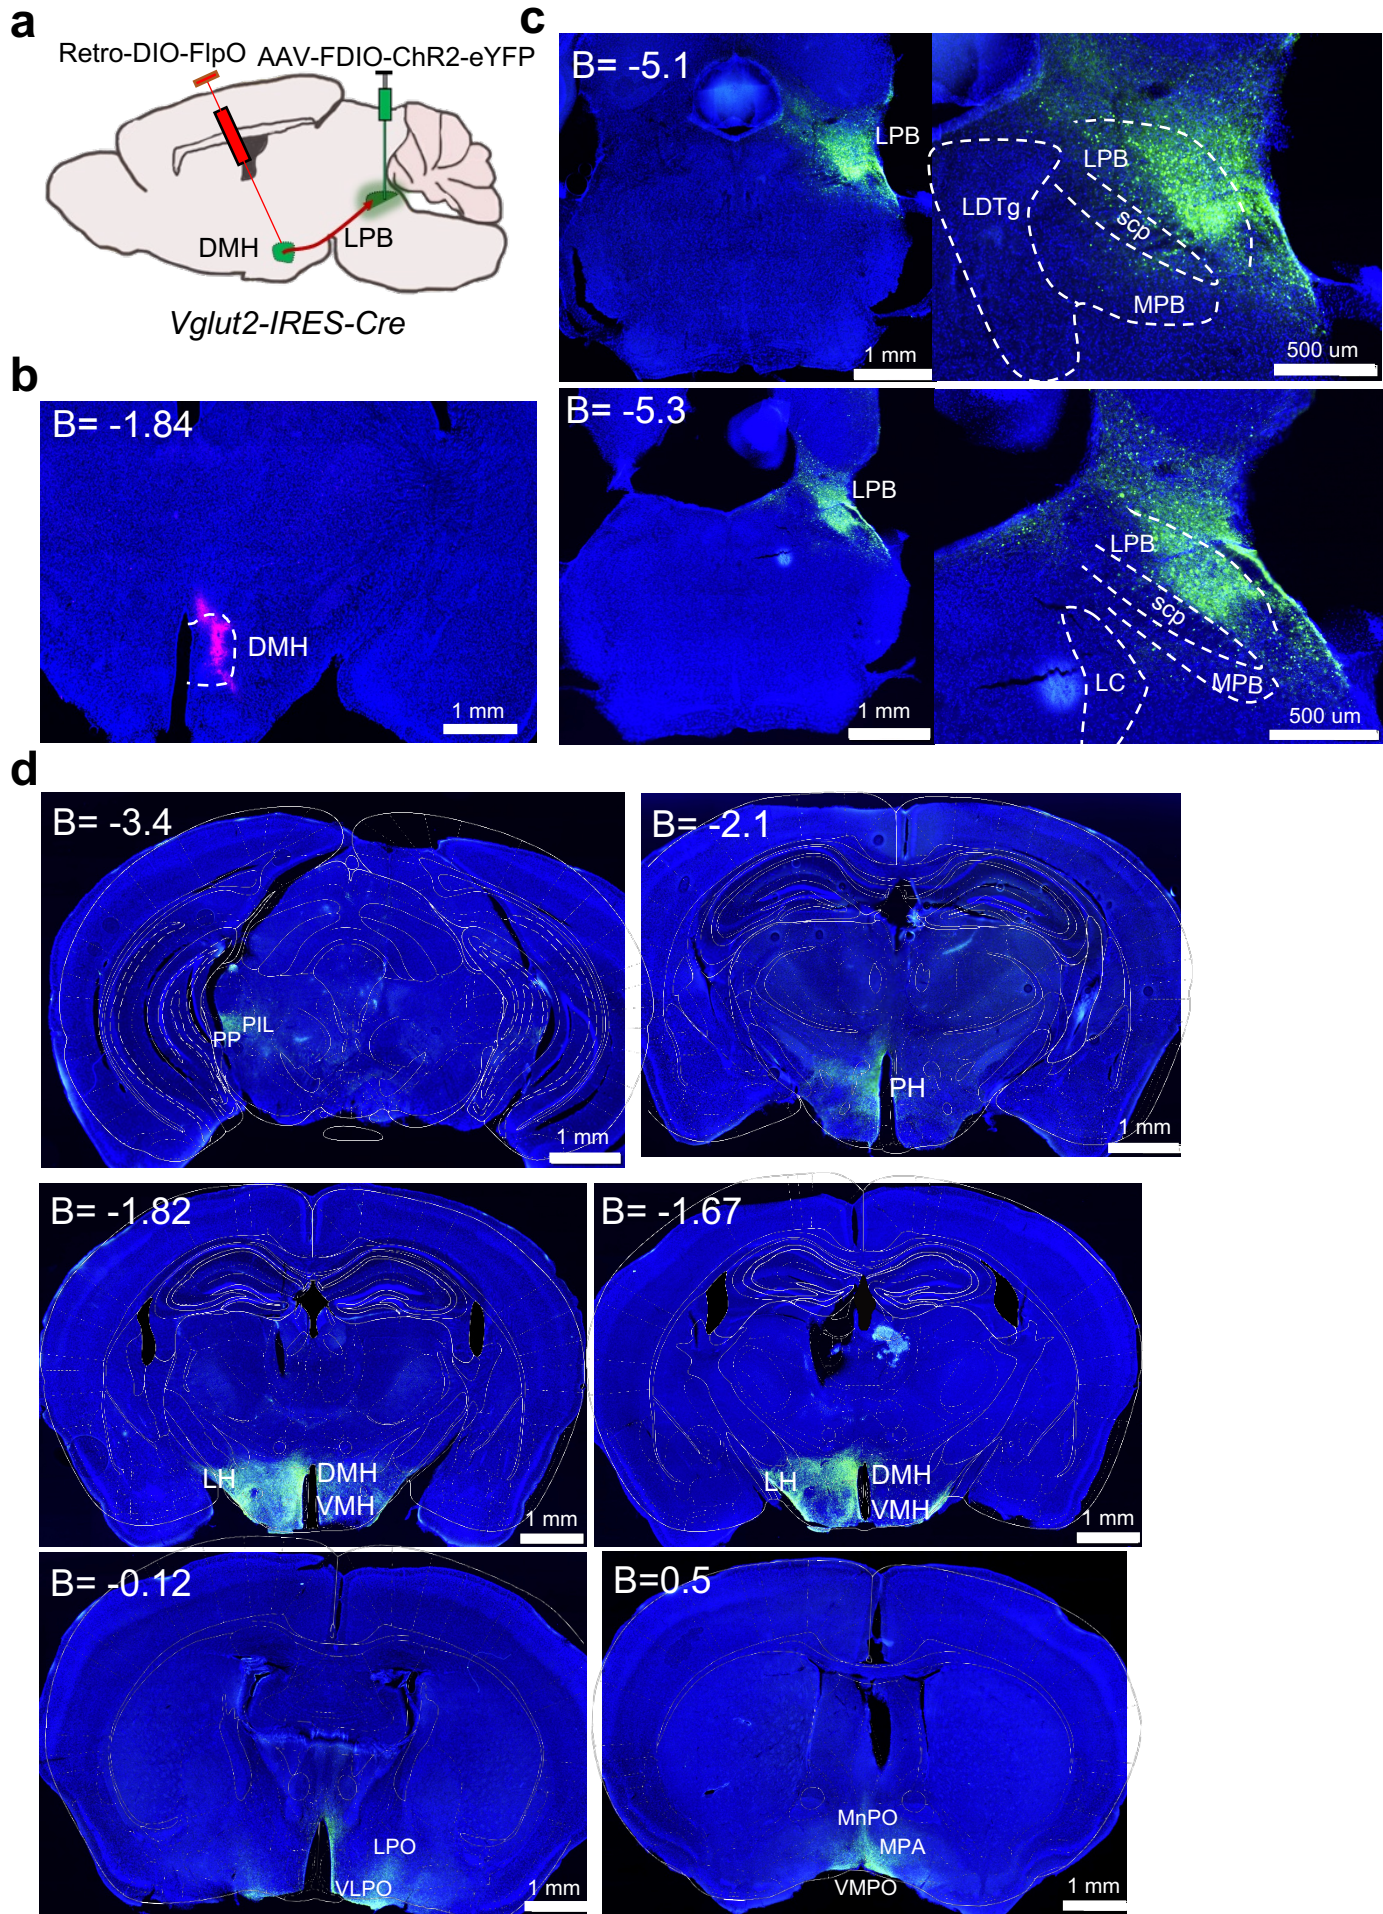

### **Supplementary Fig. 3 | Projection pattern of DMH-projecting LPB<sup>Vglut2</sup> neurons throughout the brain.**

(a) Scheme for mapping the axonal projections of DMH-projecting LPB<sup>Vglut2</sup> neurons. For labeling DMH-projecting LPB<sup>Vglut2</sup> neurons, retrograde AAVs carrying Cre-dependent FlpO were injected in the DMH, which drove the expression of FlpO-dependent ChR2-eYFP in the LPB. A red tracer (CTB647) was co-injected into the DMH to indicate the injection sites.

(b) Representative image showing the injection sites in the DMH viewed by red tracer (CTB647). This experiment was repeated at least 3 times independently with similar results.

(c) Representative images showing ChR2-eYFP expression in DMH-projecting LPB<sup>Vglut2</sup> neurons in the LPB. This experiment was repeated at least 3 times independently with similar results.

(d) Representative images are showing ChR2-eYFP expression in axonal terminals at various brain sites. This experiment was repeated at least 3 times independently with similar results.

B, bregma; LPB, lateral parabrachial nucleus; LDTg, laterodorsal tegmental nucleus; MPB, medial parabrachial nucleus; LC, locus coeruleus; scp, superior cerebellar peduncle; POA, preoptic nucleus; DMH, dorsomedial hypothalamus; VMH, ventromedial hypothalamus; LH, lateral hypothalamus; PH, poster hypothalamus; LPO, lateral preoptic area; MnPO, median preoptic nucleus; VMPO, ventromedial preoptic nucleus; MPA, medial preoptic area; VLPO, ventrolateral preoptic nucleus; PP, peripeduncular nucleus; PIL, posterior intralaminar thalamic nucleus.

# Supplementary Fig. 4 | Phenotypes associated with blocking of DMH<sup>only</sup>-projecting or POA<sup>only</sup>-projecting LPB neurons.

**a**

## Blocking DMH<sup>only</sup>-projecting LPB Neurons

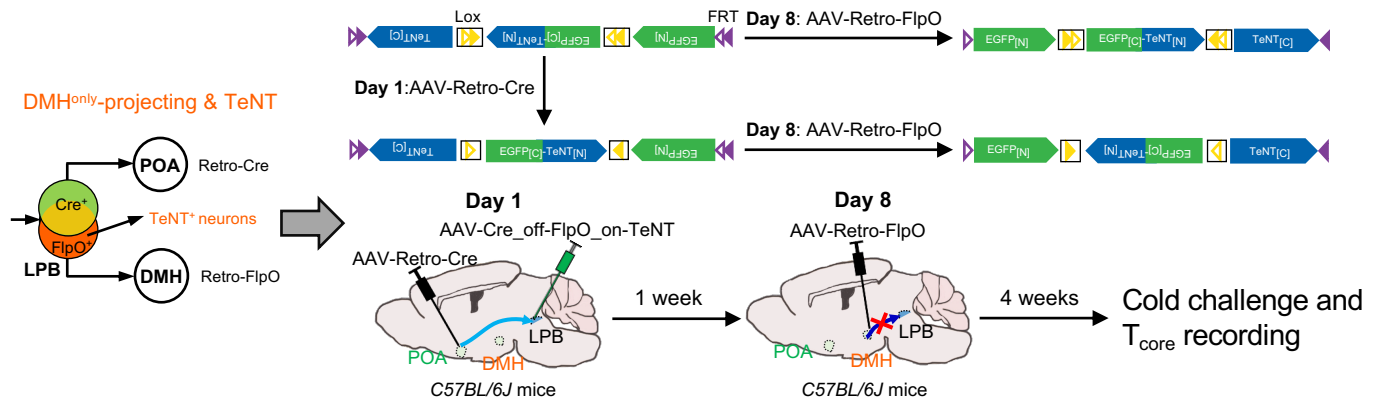

**b**

## Blocking POA<sup>only</sup>-projecting LPB Neurons

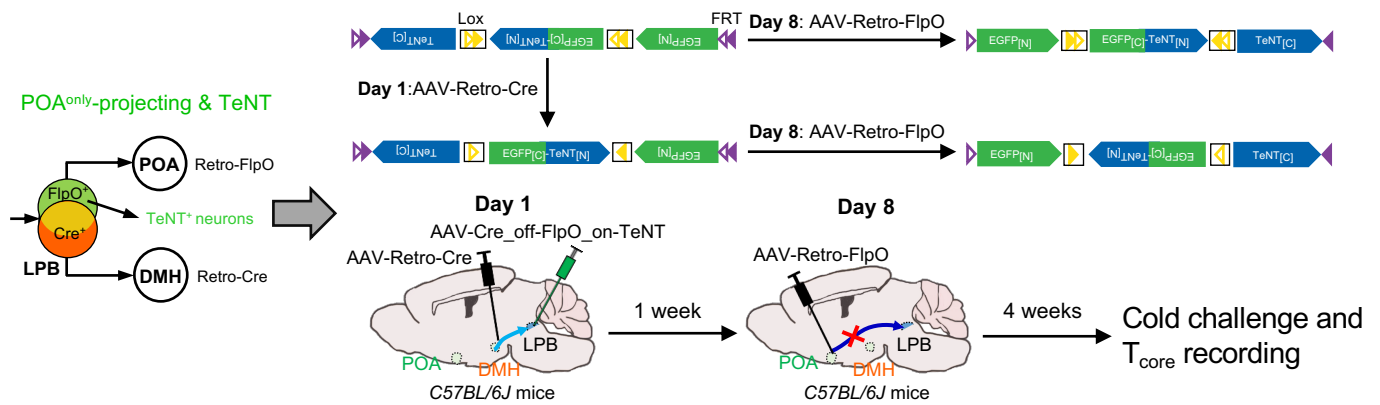

**c**

## LPB mCherry (POA-projecting) / TeNT (DMH<sup>only</sup>-projecting)

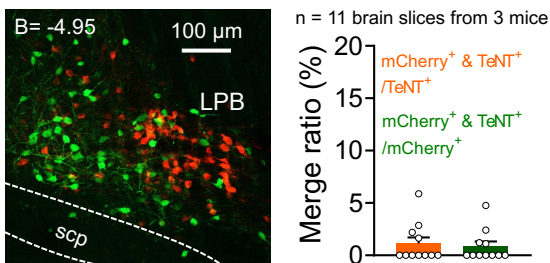

**d**

## LPB mCherry (DMH-projecting) / TeNT (POA<sup>only</sup>-projecting)

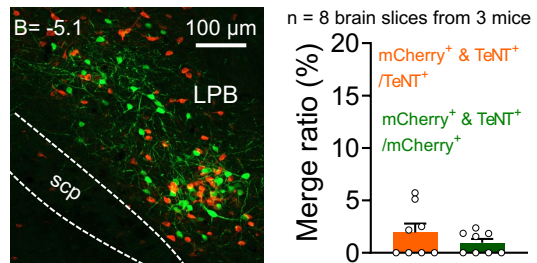

**e**

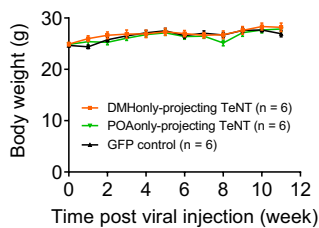

**f**

## Basal T<sub>core</sub> (T<sub>a</sub>=29 °C)

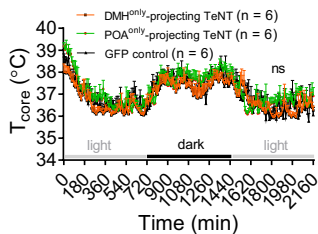

**g**

## Basal EE (T<sub>a</sub>=29 °C)

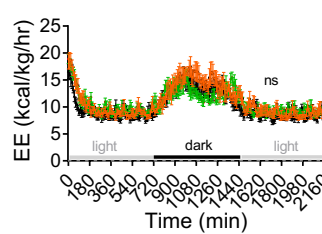

**h**

## Basal Physical Activity (T<sub>a</sub>=29 °C)

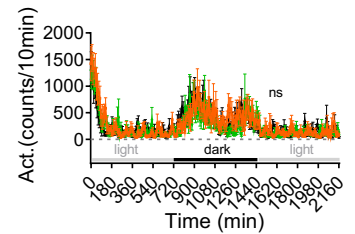

## Supplementary Fig. 4 | Phenotypes associated with blocking of DMH<sup>only</sup>-projecting or POA<sup>only</sup>-projecting LPB neurons.

(a) The scheme to block LPB neurons that projected to the DMH but did not collaterally project to the POA (DMH<sup>only</sup>-projecting LPB neurons). On day 1, the retrograde traveling AAV-Retro-hSyn-Cre virus was injected into the POA (MnPO & VMPO) and Cre<sub>off</sub>-FlpO<sub>on</sub>-TeNT (AAV9-hSyn-Cre<sub>off</sub>-FlpO<sub>on</sub>-EGFP-T2A-TeNT) injected in the LPB of C57BL/6J mice. Thus, AAV-Retro-Cre would travel to the LPB to turn off TeNT in turning off the TeNT expression in POA-projecting LPB neurons, thus unblocking POA-projecting LPB neurons. On day 8, AAV-Retro-hSyn-FlpO virus was injected into the DMH, which then traveled to the LPB to turn on the TeNT expression in DMH-projecting but not co-projecting LPB neurons (DMH<sup>only</sup>-projecting LPB neurons). Cre<sub>off</sub>-FlpO<sub>on</sub>-EGFP (AAV9-hSyn-Cre<sub>off</sub>-FlpO<sub>on</sub>-EGFP) was used as the control for Cre<sub>off</sub>-FlpO<sub>on</sub>-TeNT.

(b) The scheme to block LPB neurons that projected to the POA but did not collaterally project to the DMH (POA<sup>only</sup>-projecting LPB neurons). On day 1, the retrograde traveling AAV-Retro-hSyn-Cre virus was injected into the DMH and Cre<sub>off</sub>-FlpO<sub>on</sub>-TeNT (AAV9-hSyn-Cre<sub>off</sub>-FlpO<sub>on</sub>-EGFP-T2A-TeNT) injected in the LPB of C57BL/6J mice. Thus, AAV-Retro-Cre would travel to the LPB to turn off TeNT in turning off the TeNT expression in DMH-projecting LPB neurons, thus unblocking DMH-projecting LPB neurons. On day 8, AAV-Retro-hSyn-FlpO virus was injected into the POA (MnPO & VMPO), which then traveled to the LPB to turn on the TeNT expression in POA-projecting but not co-projecting LPB neurons (POA<sup>only</sup>-projecting LPB neurons). The same control was used as in (a).

(c) Representative images showing the little overlapping between POA-projecting LPB neurons (mCherry<sup>+</sup>) and DMH<sup>only</sup>-projecting LPB neurons (TeNT<sup>+</sup>). To label the POA-projecting LPB neurons, AAV-hSyn-DIO-mCherry was co-injected with Coff/Fon-TeNT-EGFP in the LPB in (a) so that AAV-Retro-Cre injected in the POA would travel to the LPB to turn on mCherry expression. Scale bar, 100  $\mu$ m. The overlapping ratios were quantified in the right panel (11 brain slices from 3 mice).

(d) Representative images showing the little overlapping between DMH-projecting LPB neurons (mCherry<sup>+</sup>) and POA<sup>only</sup>-projecting LPB neurons (TeNT<sup>+</sup>). To label the DMH-projecting LPB neurons, AAV-hSyn-DIO-mCherry was co-injected with Coff/Fon-TeNT-EGFP in the LPB in (b) so that AAV-Retro-Cre injected in the DMH would travel to the LPB to turn on mCherry expression. Scale bar, 100  $\mu$ m. The overlapping ratios were quantified in the right panel (8 brain slices from 3 mice).

(e-h) Changes of body weight (e), basal  $T_{\text{core}}$  (f), basal energy expenditure (g) and basal physical activity (h) at thermoneutral temperature (f-h) after blocking the DMH<sup>only</sup>-projecting LPB neurons or POA<sup>only</sup>-projecting LPB neurons, as indicated (n = 6 mice each).

LPB, lateral parabrachial nucleus; POA, preoptic area; DMH, dorsomedial hypothalamic nucleus; TeNT, Tetanus toxin. All data are shown as mean  $\pm$  sem. The p-values are calculated based on two-way ANOVA (e-h). ns, not significant. Source data are provided as a Source data file.



# Supplementary Fig. 5 | Heatmaps of TeNT expression and baseline measurement after blocking LPB-innervating POA or DMH neurons.

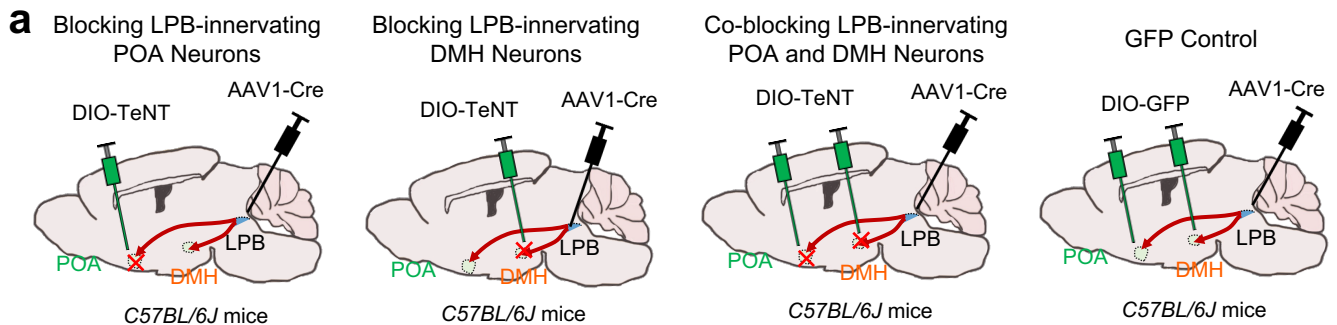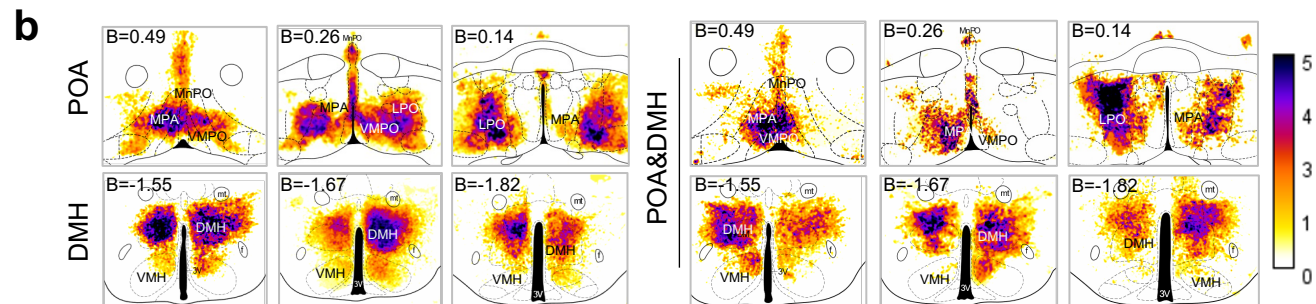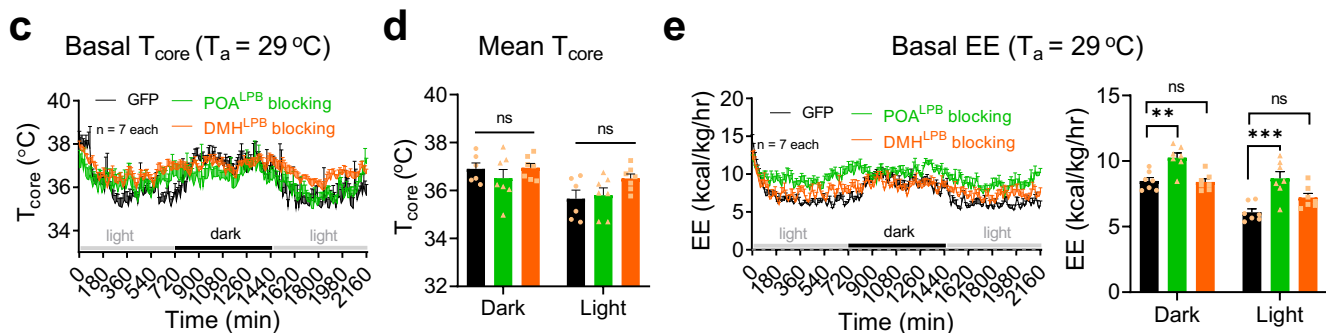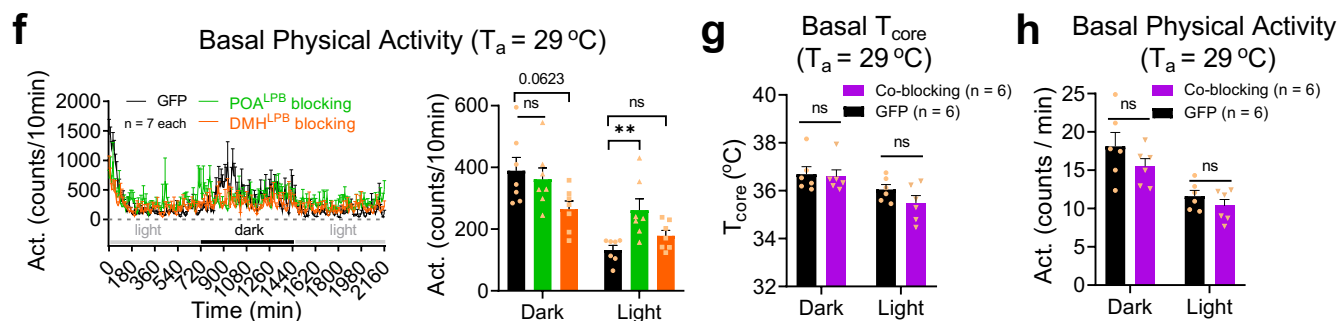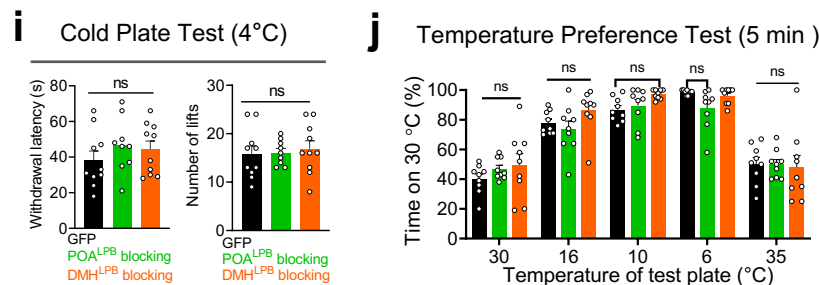

## Supplementary Fig. 5 | Heatmaps of TeNT expression and baseline measurement after blocking LPB-innervating POA or DMH neurons.

(a) The scheme to block LPB-innervating POA (mainly MnPO, VMPO, MPA, and LPO) neurons, LPB-innervating DMH neurons, LPB-innervating POA and DMH Neurons (Co-blocking), and GFP control. The anterograde transsynaptic Cre carried by AAV1 (AAV1-hSyn-Cre) was injected in the LPB, which drove the expression of AAV9-hEF1a-DIO-mCherry-P2A-TeNT injected in the POA (POA<sup>LPB</sup> blocking), the DMH (DMH<sup>LPB</sup> blocking), or both (co-blocking), as indicated. AAV9-hSyn-DIO-GFP was injected as the control (GFP), where AAV1-hSyn-Cre was injected in the LPB and AAV9-hSyn-DIO-GFP was injected in both the POA and DMH.

(b) Heatmaps of TeNT expression at different Bregma sites from all experimental mice. POA<sup>LPB</sup> blocking, n = 9 mice; DMH<sup>LPB</sup> blocking, n = 10 mice; co-blocking, n = 6 mice. The relative scale for the expression intensity (measured by fluorescence intensity) was shown in the right.

(c-f) Changes of basal  $T_{\text{core}}$  (c-d), basal energy expenditure (e), and basal physical activity (f) at thermoneutral temperature (29°C) after blocking LPB-innervating DMH neurons (DMH<sup>LPB</sup> blocking) or LPB-innervating POA neurons (POA<sup>LPB</sup> blocking), as indicated (n = 7 each).

(g-h) Changes of basal  $T_{\text{core}}$  (g) and basal physical activity (h) at thermoneutral temperature (29°C) after blocking LPB-innervating POA and DMH neurons (Co-blocking), as indicated (n = 6 each).

(i) Withdrawal latency and the number of lifts in the cold plate test (4°C) after blocking LPB-innervating POA/DMH neurons (n = 10 for GFP and DMH<sup>LPB</sup> blocking group; n = 9 for POA<sup>LPB</sup> blocking group).

(j) Changes in preference to 30°C versus 35/16/10/6°C after blocking LPB-innervating POA/DMH neurons (n = 9 mice each).

All data are shown as mean  $\pm$  sem. The p-values are calculated based on one-way ANOVA (d-f, i-j) or unpaired t-test (g-h). The p-values are calculated based on statistical tests in Supplementary Table 2. \*p  $\leq$  0.05; \*\*p  $\leq$  0.01; \*\*\*p  $\leq$  0.001; ns, not significant. Source data are provided as a Source data file.

# Supplementary Fig. 6 | Detailed viral expressions, fiber insert positions, and $T_{core}$ changes of the manipulation of the LPB<sup>Vglut2</sup>→DMH projection that hit or missed the targets.

a

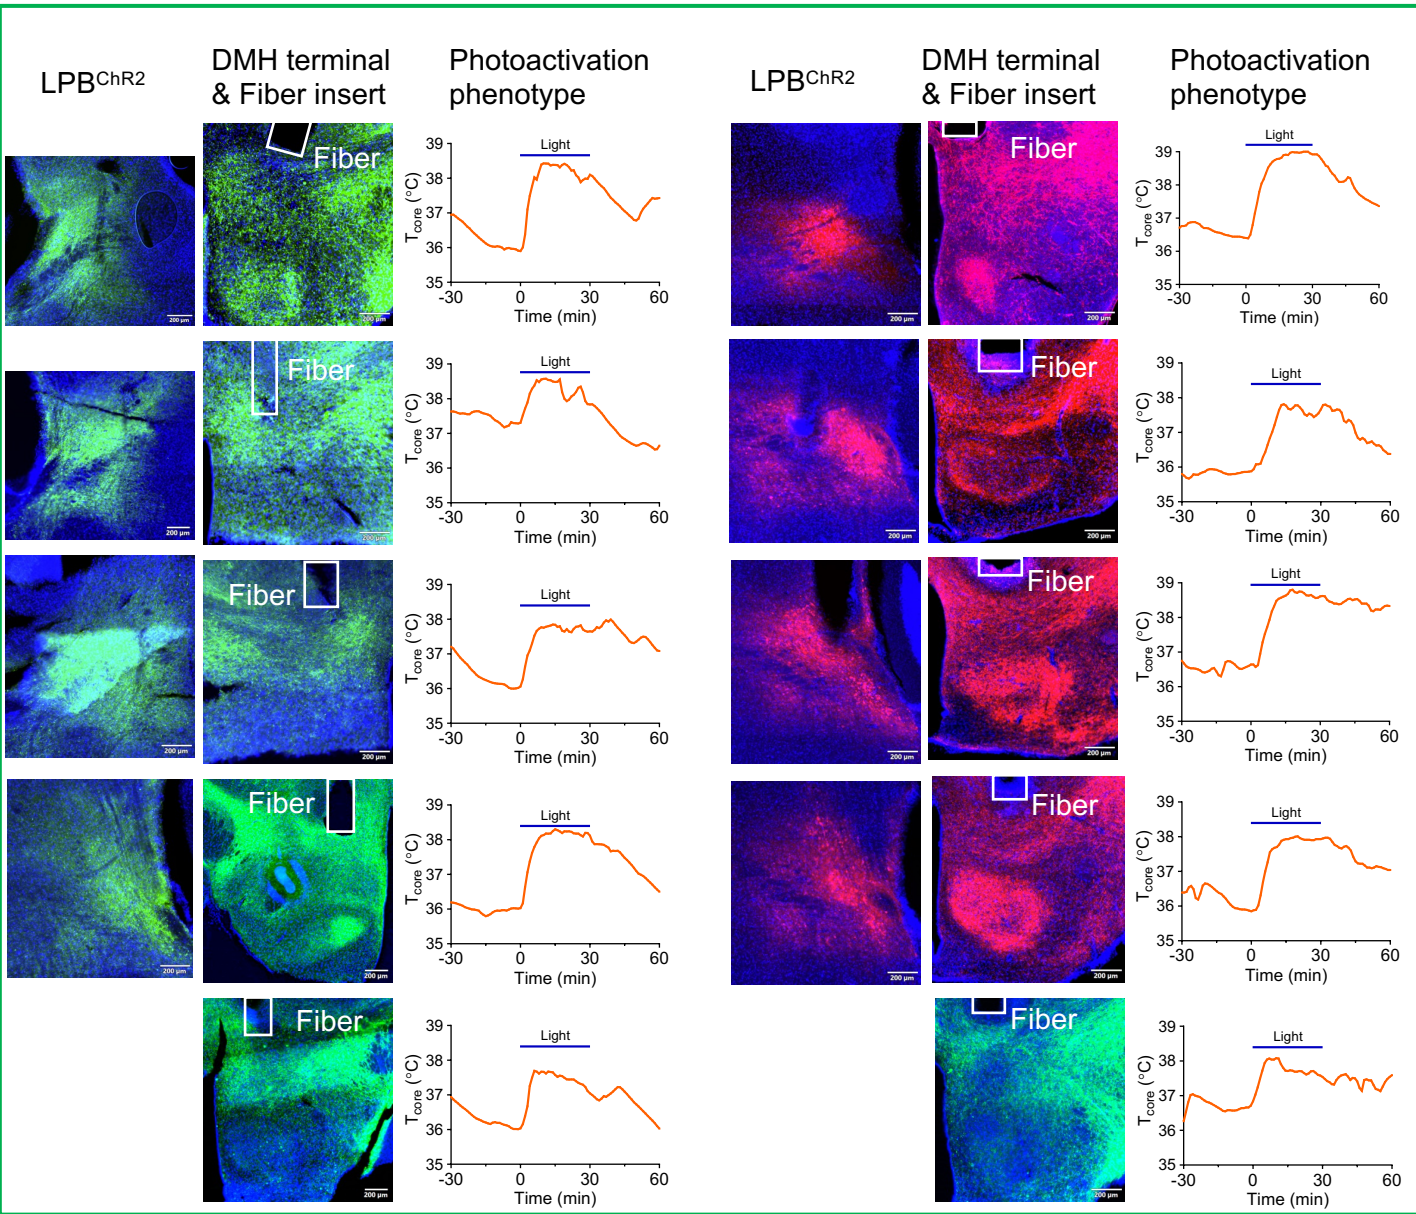

b

## One mouse that missed target of photoactivation

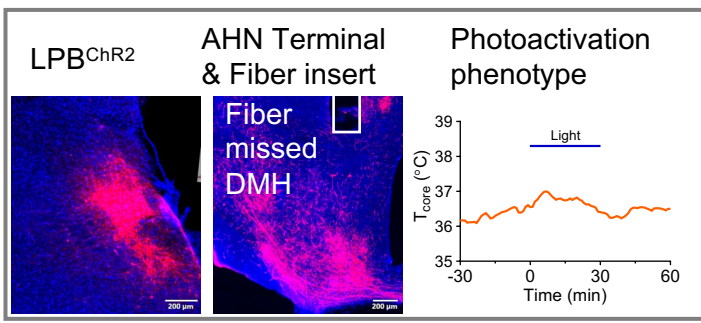

**Supplementary Fig. 6 | Detailed viral expressions, fiber insert positions, and  $T_{\text{core}}$  changes of the manipulation of the  $\text{LPB}^{\text{Vglut2}} \rightarrow \text{DMH}$  projection that hit or missed the targets.**

(a) Representative images demonstrating the expression of ChR2 in  $\text{LPB}^{\text{Vglut2}}$  neurons, fiber insert positions and resulting  $T_{\text{core}}$  changes after photoactivation  $\text{LPB}^{\text{Vglut2}} \rightarrow \text{DMH}$  that hit the target. This experiment was repeated at least 10 times independently with similar results.

(b) Data from one mouse exhibiting missed fiber insert positions and  $T_{\text{core}}$  changes following photoactivation. AHN, anterior hypothalamic nucleus. This experiment was repeated at least 1 times independently with similar results. Source data are provided as a Source data file.

# Supplementary Fig. 7 | Phenotypes associated with neural blocking of POA neurons, DMH<sup>Vglut2</sup> neurons and DMH<sup>Vgat</sup> neurons.

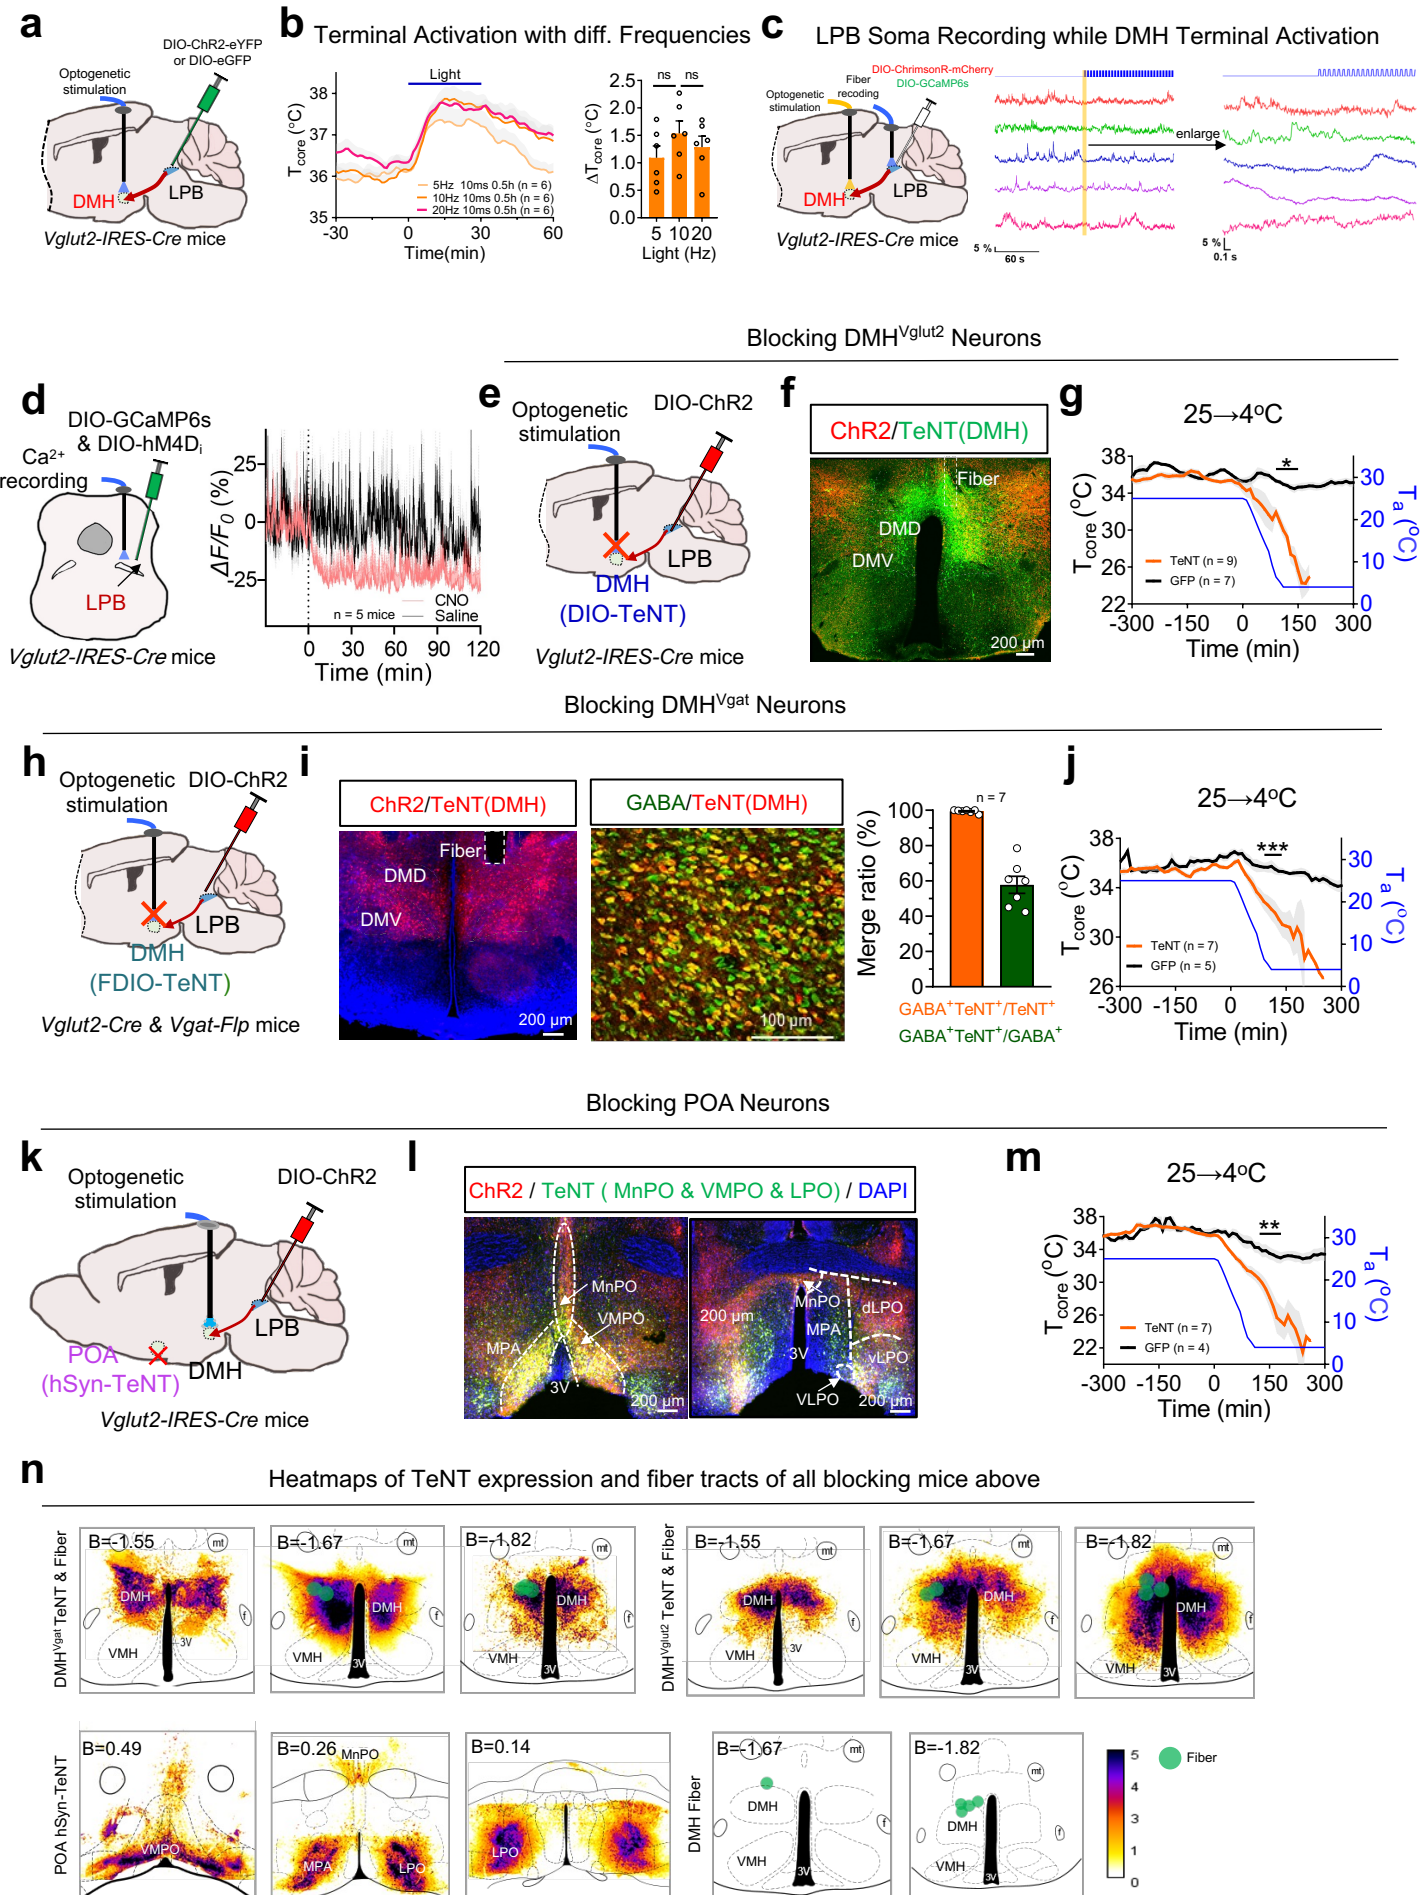

## Supplementary Fig. 7 | Phenotypes associated with neural blocking of POA neurons, DMH<sup>Vglut2</sup> neurons and DMH<sup>Vgat</sup> neurons.

- (a) Scheme of optogenetic activation of glutamatergic (Vglut2+) LPB neural terminals in the DMH.
- (b) Changes of  $T_{\text{core}}$  after 30 min photoactivation of LPB<sup>Vglut2</sup> neural terminals in the DMH (n = 6 each). Laser pattern: 473 nm, 12mW, Hz as indicated, 30 min.
- (c) Scheme for simultaneously expressing the GCaMP6s and ChrimsonR in the LPB, then the DMH terminals were simultaneously activated using a 589nm laser and  $\text{Ca}^{2+}$  activity was recorded in the LPB (left panel). No obvious calcium signal changes were recorded in LPB after activating DMH's terminals (n = 5 mice). The blue pulse line indicates light stimulation (right panel). Light pattern: 589 nm, 6 mW, 10 Hz, 10 ms, 2-s on followed by 2-s off, with the cycles repeating for 10 min.
- (d) Scheme for calcium photometry of LPB<sup>Vglut2</sup> neurons before and after chemogenetic inhibition. AAVs carrying inhibitory chemogenetic tool hM4D(Gi) (AAV9-EF1 $\alpha$ -DIO-hM4D(Gi)-mCherry) and GCaMP6s (AAV9-hSyn-DIO-GCaMP6s) were co-injected in the LPB of Vglut2-Cre mice to block neural activity and record calcium dynamics of LPB<sup>Vglut2</sup> neurons, respectively. The optical fiber for calcium photometry was implanted in the LPB (left panel). Calcium dynamics of LPB<sup>Vglut2</sup> neurons before and after chemogenetic inhibition. CNO was injected (i.p., 10mg/kg) at t = 0 min.  $\Delta F/F_0$  represents the change in GCaMP6s fluorescence from the mean level (right panel, n = 5 mice).
- (e) Scheme for blocking DMH<sup>Vglut2</sup> neurons using TeNT. AAV5-hSyn-DIO-GFP-P2A-TeNT was injected in the DMH of Vglut2-IRES-Cre mice to block DMH<sup>Vglut2</sup> neurons.
- (f) Representative TeNT expression in the DMH<sup>Vglut2</sup> neurons. This experiment was repeated at least 9 times independently with similar results.
- (g) Changes of  $T_{\text{core}}$  during cold challenges (25 $\rightarrow$ 4 $^{\circ}$ C) after blocking DMH<sup>Vglut2</sup> neurons (TeNT, n = 9 mice; GFP, n = 7 mice, a total of 10 mice were injected for each group, 1 mouse for TeNT and 3 mice for GFP were excluded from the final analysis due to missed injections or death).
- (h) Scheme for blocking DMH<sup>Vgat</sup> neurons using TeNT. AAV9-hEF1 $\alpha$ -FDIO-mCherry-P2A-TeNT was injected in the DMH of Vglut2-IRES-Cre & Vgat-T2A-FlpO mice to block DMH<sup>Vgat</sup> neurons.
- (i) Representative TeNT expression in DMH<sup>Vgat-FlpO</sup> neurons and the colocalization of TeNT and GABA immunostaining. The overlapping ratios were quantified in the right. This experiment was repeated at least 7 times independently with similar results.
- (j) Changes of  $T_{\text{core}}$  during cold challenges (25 $\rightarrow$ 4 $^{\circ}$ C) after blocking DMH<sup>Vgat</sup> neurons (TeNT, n = 7 mice; GFP, n = 5 mice, a total of 10 mice for TeNT and 5 mice for GFP were injected for each group, 3 mice for TeNT were excluded from the final analysis due to missed injections or death).
- (k) Scheme for blocking POA neurons using TeNT. AAV9-hSyn-eGFP-2A-TeNT were injected in the POA of Vglut2-IRES-Cre mice to block POA neurons.
- (l) Representative TeNT expression in the POA (MnPO, VMPO, MPA and LPO) neurons. This experiment was repeated at least 7 times independently with similar results.
- (m) Changes of  $T_{\text{core}}$  during cold challenges (25 $\rightarrow$ 4 $^{\circ}$ C) after blocking bulk POA neurons (TeNT, n = 7 mice; GFP, n = 4 mice, a total of 10 mice for TeNT and 5 mice for GFP were injected for each group, 3 mice for TeNT and 1 mouse for GFP were excluded from the final analysis due to missed injections or death).
- (n) Heatmaps of TeNT expression and fiber tracts (shown as green dots, each dot represent one mouse) at different Bregma sites from all experimental mice. DMH<sup>Vglut2</sup> TeNT, n = 9 mice; DMH<sup>Vgat</sup> TeNT, n = 7 mice; POA TeNT, n = 7 mice. The relative scale for the expression intensity was shown in the right.

All data are shown as mean  $\pm$  sem. The p-values are calculated based on two-way ANOVA statistical tests. The p-values are calculated based on statistical tests in Supplementary Table 2. \*\*p  $\leq$  0.01; \*\*\*p  $\leq$  0.001. Source data are provided as a Source data file.

# Supplementary Fig. 8 | Properties and whole-brain axonal projections of LPB<sup>SST</sup> neurons.

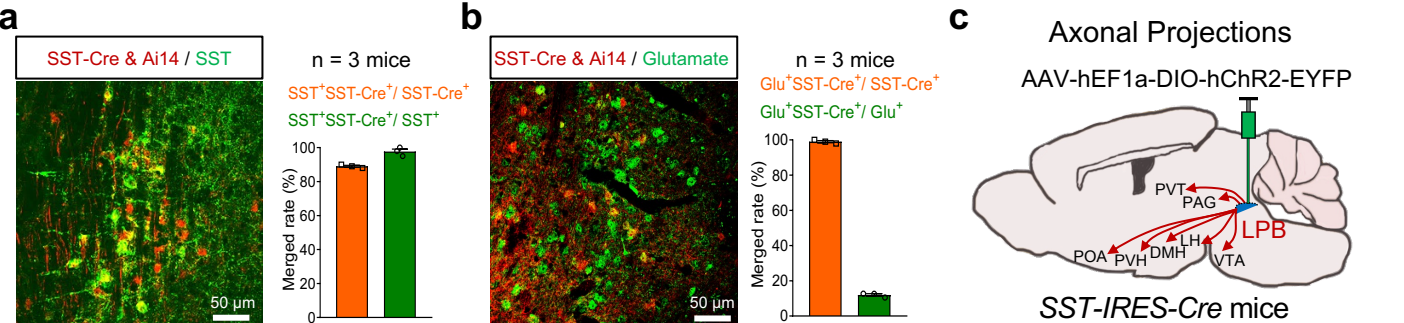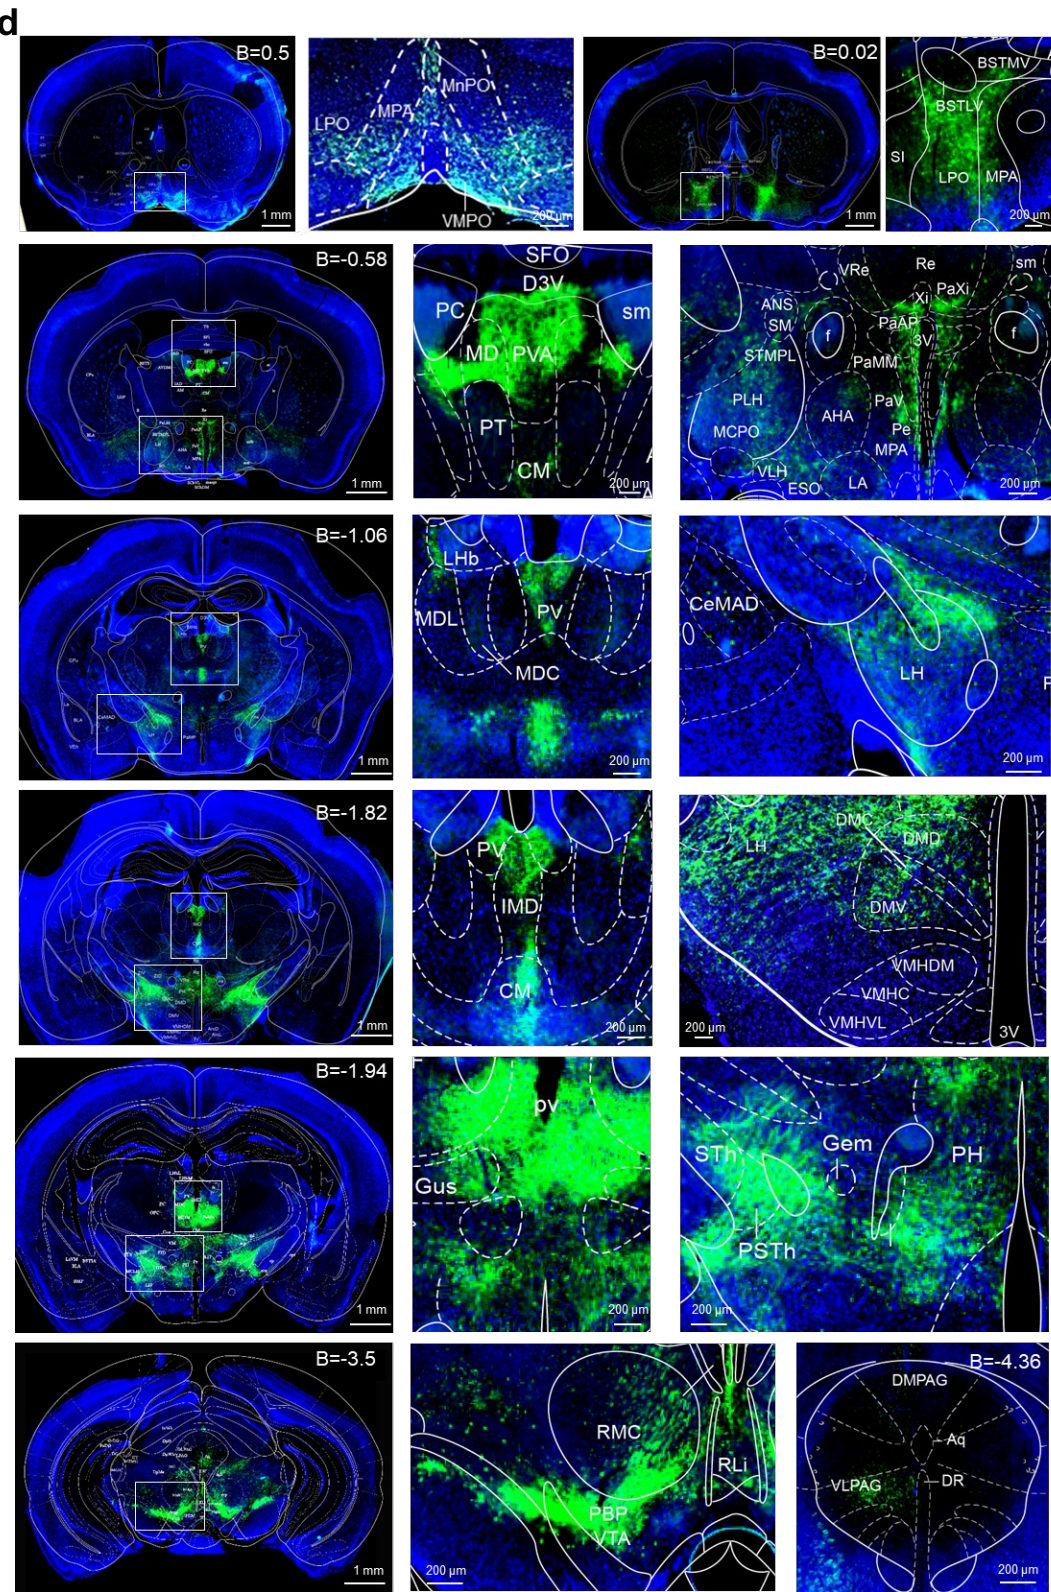

## Supplementary Fig. 8 | Properties and whole-brain axonal projections of LPB<sup>SST</sup> neurons.

(a-b) Overlap between SST-IRES-Cre labeled neurons (Tdt<sup>+</sup>) in the LPB and the following immuno-positive neurons: SST peptide (a) and glutamate (b). SST-IRES-Cre mice were crossed with Ai14 (Rosa-CAG-LSL-tdTomato-WPRE) to label SST-IRES-Cre in the LPB. Overlap ratios are shown on the right of each panel (n = 3 mice each). All data are shown as mean  $\pm$  sem. Source data are provided as a Source data file.

(c) The axonal projection pattern of LPB<sup>SST</sup> neurons throughout the brain, revealed by anterograde tracing AAVs. Injection sites of AAV9-DIO-ChR2-eYFP in the LPB were indicated in the figure. Thicker lines indicated stronger eYFP expressions.

(d) Representative images showing ChR2-eYFP expression in axonal terminals at various brain sites. This experiment was repeated at least 8 times independently with similar results.

AHA, anterior hypothalamic, anterior; B, bregma; BNST, bed nucleus of the stria terminalis; SFO, subfornical organ; sm, stria medullaris of the thalamus; PVA, paraventricular thalamic nucleus, anterior part; PT, paratenia thalamic nucleus; PaAP, paraventricular hypothalamic nucleus, anterior parvic; PaMM, paraventricular hypothalamic nucleus, medial magnocellular part; MDL, mediodorsal thalamic nucleus, lateral part; LHb, lateral habenular nucleus; Pe, periventricular hypothalamic nucleus; PaV, paraventricular hypothalamic nucleus, ventral part; PV, paraventricular thalamic nucleus; BLA, basolateral amygdaloid nucleus, anterior part; CeMAD central amygdaloid nucleus, medial division, anterodorsal part; MD, intermediodorsal thalamic nucleus; DM, central medial thalamic nucleus; PH, posterior hypothalamic nucleus; VMH, ventromedial hypothalamic nucleus; VMHC, ventromedial hypothalamic nucleus, central part; VMHDM, ventromedial hypothalamic nucleus, dorsomedial part; VMHVL, ventromedial hypothalamic nucleus, ventrolateral part; SC, superior colliculus; PSTh parasubthalamic nucleus; STh subthalamic nucleus; POA, preoptic nucleus; Gem, gemini hypothalamic nucleus; Gus gustatory thalamic; VPM, ventral posteromedial thalamic; DMC, dorsomedial hypothalamic nucleus, compact part; DMD, dorsomedial hypothalamic nucleus, dorsal part; RMC, red nucleus, magnocellular part; ZID, zona incerta, dorsal part; Aq, aqueduct(Sylvius); DLPAG, dorsolateral periaqueductal gray; DMPAG, dorsomed periaqueductal; InG, intermediate gray layer of the superior colliculus; LPO, lateral preoptic area; MPA, medial preoptic area; SIB, substantia innominata, basal part; HDB, nucleus of the horizontal limb of the diagonal band; D3V, dorsal 3rd ventricle; PVT, paraventricular thalamic nucleus.



# Supplementary Fig. 9 | Phenotypes associated with activation of LPB<sup>SST</sup> neurons and LPB<sup>SST</sup>→POA pathway.

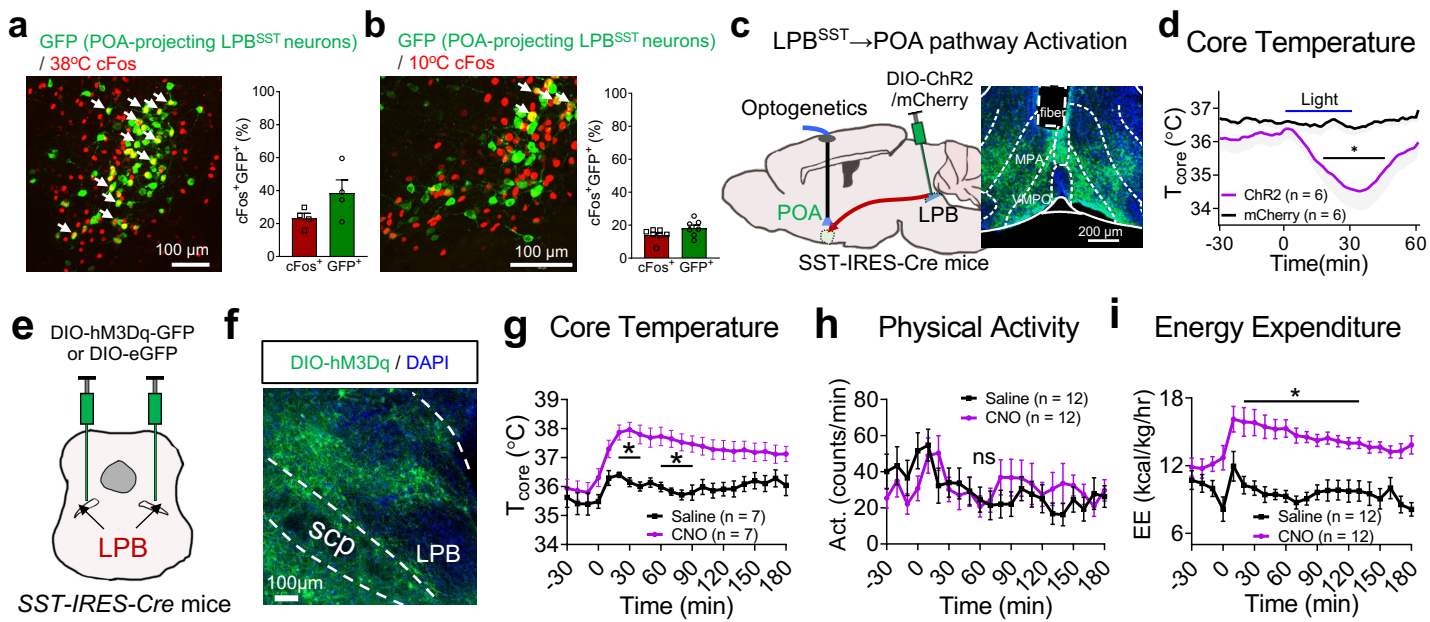

(a-b) Overlap between POA-projecting LPB<sup>SST</sup> neurons and heat-induced cFos (a) or cold-induced cFos (b) (n = 3 mice each, 1-2 slices for each mouse). To label POA-projecting LPB<sup>SST</sup> neurons, we injected retrograde AAVs carrying Cre-dependent GFPL10 (AAV-Retro-CAG-Flex-GFPL10) in the VMPO of SST-IRES-Cre mice, which drove the expression of GFPL10 in the LPB. Merged cells were indicated by white arrows.

(c) Design to activate the LPB<sup>SST</sup>→POA projection via photostimulating of LPB<sup>SST</sup> & ChR2 terminals in the VMPO. The representative expression of ChR2-eYFP in the POA is shown in right. This experiment was repeated at least 6 times independently with similar results.

(d) Changes in T<sub>core</sub> after photoactivation of the LPB<sup>SST</sup>→POA projection. (n = 6 mice each). Light pattern: 473 nm, 6 mW, 10 Hz, 10 ms, 2-s on followed by 2-s off, with the cycles repeating for 30 min.

(e) Scheme for chemogenetic activation of LPB<sup>SST</sup> neurons using hM3D<sub>q</sub>. AAVs carrying hM3D<sub>q</sub> (AAV9-hSyn-DIO-hM3D(G<sub>q</sub>)-eGFP) were injected in the LPB to activate LPB<sup>SST</sup> neurons.

(f) Representative expression of hM3D<sub>q</sub> in LPB<sup>SST</sup> neurons. This experiment was repeated at least 7 times independently with similar results.

(g-i) Changes of T<sub>core</sub> (g), physical activity (h), and energy expenditure (i) after chemogenetic activation of LPB<sup>SST</sup> neurons (n = 12 mice each). CNO was injected (i.p., 2.5 mg/kg) at t = 0 min.

All data are shown as mean ± sem. The p-values are calculated based on RM two-way ANOVA. The p-values are calculated based on statistical tests in Supplementary Table 2. \*p ≤ 0.05; ns, not significant. Source data are provided as a Source data file.

# Supplementary Fig. 10 | The DMH→RPa pathway is downstream of the LPB→DMH pathway in regulating cold defense.

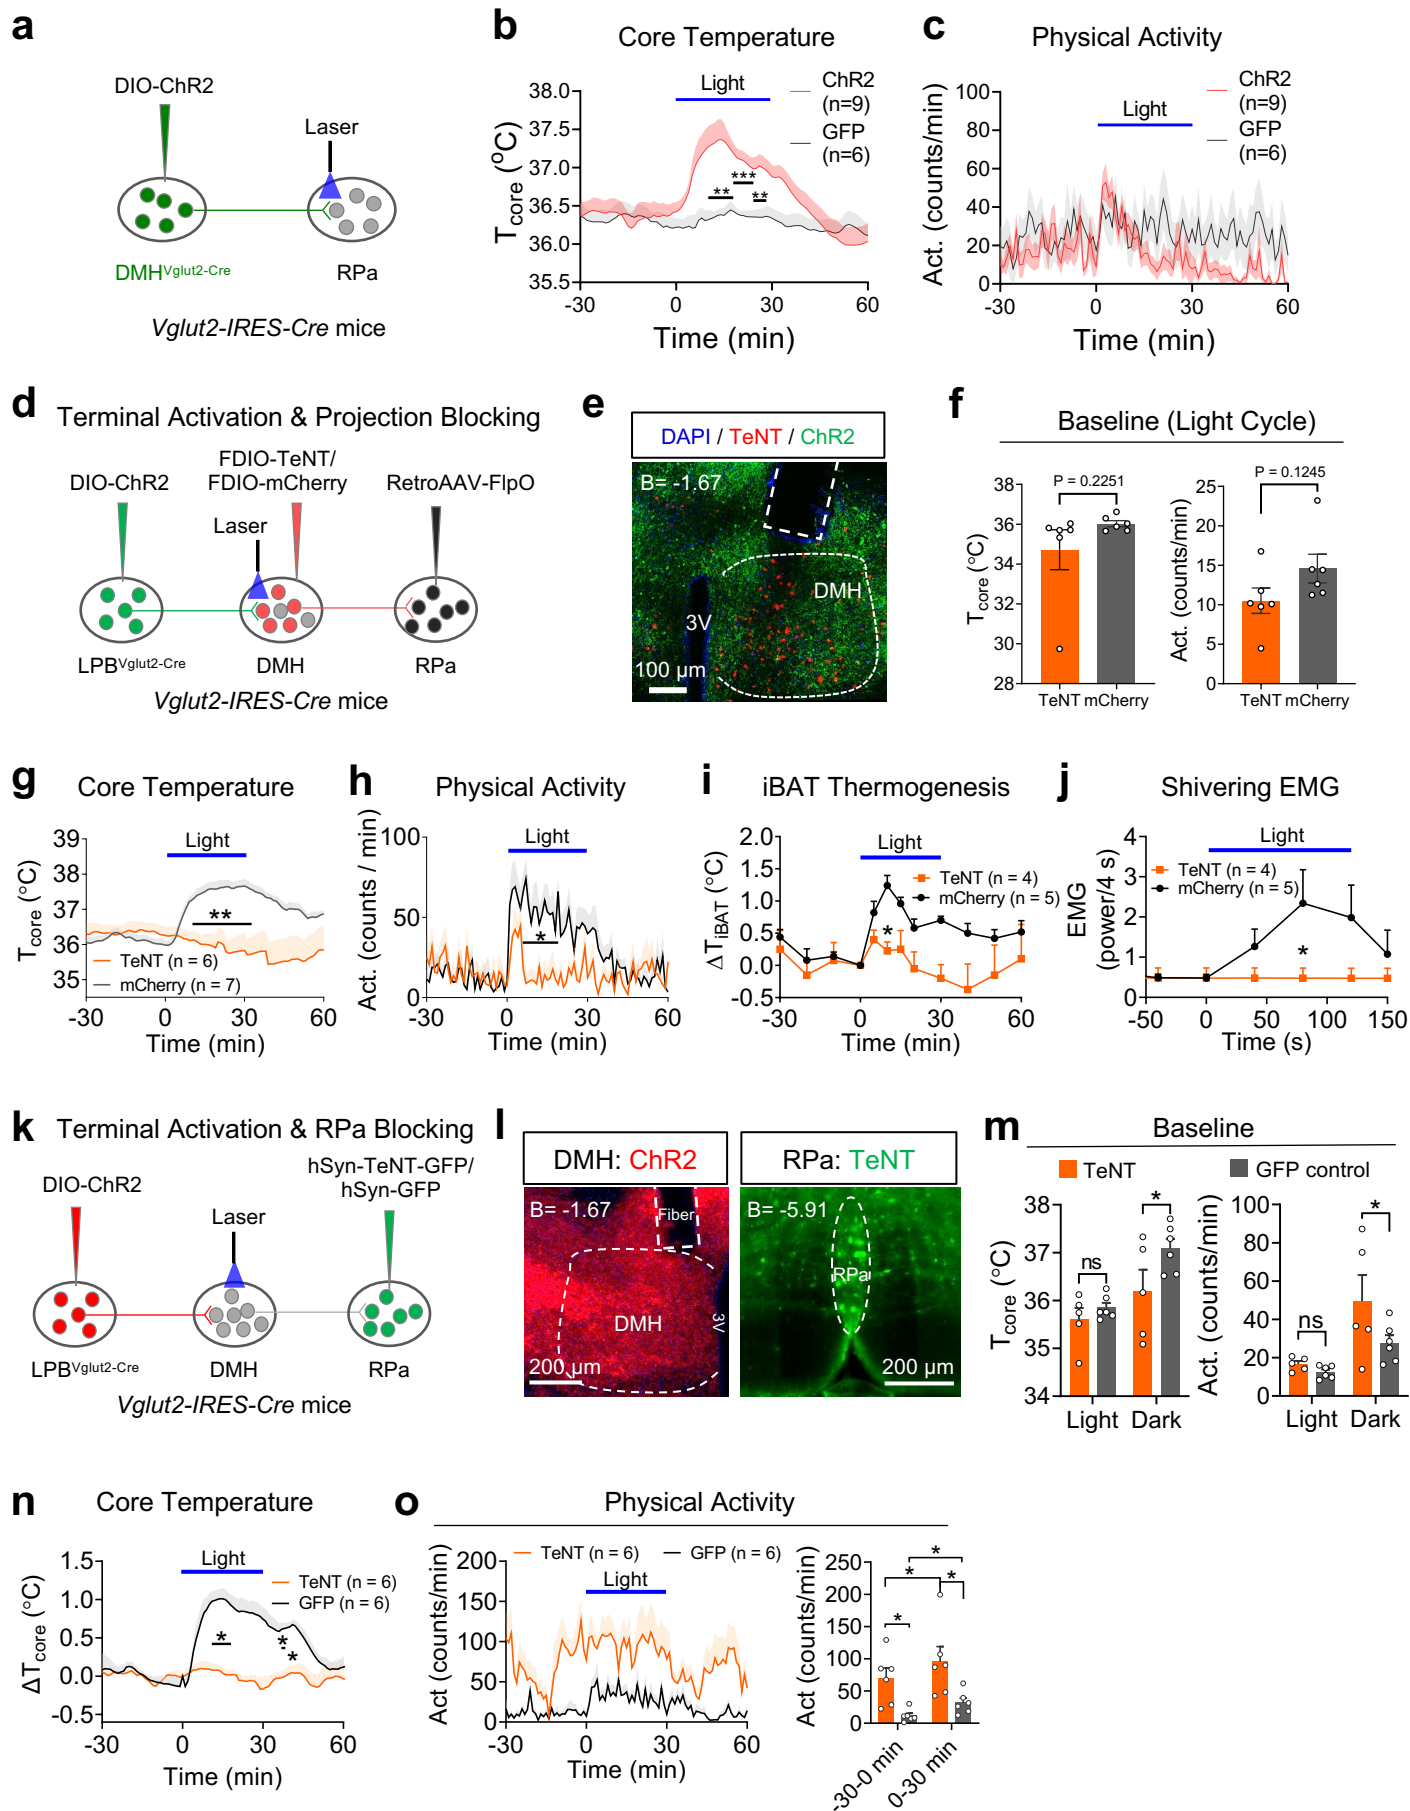

## Supplementary Fig. 10 | The DMH→RPa pathway is downstream of the LPB→DMH pathway in regulating cold defense.

(a) Activating the DMH<sup>Vglut2</sup>→RPa projection via photoactivation of DMH<sup>Vglut2 & ChR2</sup> neural terminals in the RPa. AAVs carrying Cre-dependent ChR2 (AAV9-hEF1a-DIO-hChR2-EYFP) were injected into the DMH of Vglut2-IRES-Cre mice. An optical fiber was implanted above the RPa and used for optogenetic activation of neural terminals. AAV9-hSyn-Flex-GFP was used as the control.

(b-c) Changes of  $T_{\text{core}}$  (b) and physical activity (c) after photoactivation of DMH<sup>Vglut2 & ChR2</sup> neural terminals in the RPa (ChR2, n = 9 mice; GFP, n = 6 mice). Light pattern: 473 nm, 12 mW, 10 Hz, 10 ms, 2-s on followed by 2-s off, with the cycles repeating for 30 min.

(d) Photoactivation of LPB<sup>Vglut2</sup> terminals in the DMH while blocking RPa-projecting DMH neurons. To block RPa-projecting DMH neurons, retrograde AAVs carrying FlpO (AAV-Retro-hSyn-FlpO) were injected in the RPa, which drove the expression of FlpO-dependent TeNT (AAV9-hEF1a-FDIO-mCherry-2A-TeNT) in the DMH.

(e) Representative images of LPB<sup>Vglut2 & ChR2</sup> terminals in the DMH (green) and TeNT expression from RPa-projecting DMH neurons (red). This experiment was repeated at least 6 times independently with similar results.

(f) Average basal  $T_{\text{core}}$  and physical activity after blocking RPa-projecting DMH neurons during the light cycle at  $T_a = 26^\circ\text{C}$  (n = 6 mice each).

(g-j) Changes in  $T_{\text{core}}$  (g), physical activity (h),  $T_{\text{IBAT}}$  (i), and nuchal muscle EMG (j) in response to photoactivation of LPB<sup>Vglut2</sup> terminals in the DMH while blocking of RPa-projecting DMH neurons (g-h: TeNT, n = 6 mice; mCherry, n = 7 mice; i-j: TeNT, n = 4 mice; mCherry, n = 5 mice). Light pattern: 473 nm, 6 mW, 10 Hz, 10 ms, 2-s on followed by 2-s off, with the cycles repeating for 30 min in (g-i) and 120 s in (j).

(k) Photoactivation of LPB<sup>Vglut2</sup> terminals in the DMH while blocking RPa neurons.

(l) Representative images of LPB<sup>Vglut2 & ChR2</sup> terminals (red) in the DMH (left panel) and TeNT expression (green) in RPa neurons (right panel). Scale bar, 200  $\mu\text{m}$ . This experiment was repeated at least 6 times independently with similar results.

(m) Average basal  $T_{\text{core}}$  and physical activity after blocking RPa neurons during the dark and light cycle at  $T_a = 26^\circ\text{C}$  (TeNT, n = 5 mice; GFP, n = 6 mice).

(n-o) Changes in  $\Delta T_{\text{core}}$  (n) and physical activity (o) in response to photoactivation of LPB<sup>Vglut2</sup> terminals in the DMH while blocking of RPa neurons (n = 6 for each group). Light pattern: 473 nm, 6 mW, 10 Hz, 10 ms, 2-s on followed by 2-s off, with the cycles repeating for 30 min. Note, RPa blocking caused compulsive-like circling behavior at the basal level.

LPB, lateral parabrachial nucleus; POA, preoptic area; DMH, dorsomedial hypothalamic nucleus. RPa, raphe pallidus nucleus. All data are the mean  $\pm$  SEM, (f,m) was analyzed by unpaired t-test, and (b-c, g-j, n-o) were analyzed by two-way RM ANOVA. The p-values are calculated based on statistical tests in Supplementary Table 2. ns, not significant; \* $p \leq 0.05$ ; \*\* $p \leq 0.01$ . Source data are provided as a Source data file.

**Supplementary Table 1. Summary of TRAP-seq data**

| gene id           | gene name | log2FC   | Pvalue   | Qvalue   |
|-------------------|-----------|----------|----------|----------|
| ENSMUSG(Irgm2     |           | -7.44759 | 2.14E-10 | 6.69E-08 |
| ENSMUSG(Bank1     |           | -6.87598 | 4.46E-05 | 0.002274 |
| ENSMUSG(Ptgr1     |           | -6.47846 | 1.98E-06 | 0.000164 |
| ENSMUSG(Gm7694    |           | -6.46253 | 2.15E-06 | 0.000176 |
| ENSMUSG(Pdzph1    |           | -6.39189 | 3.85E-05 | 0.002021 |
| ENSMUSG(Gm42798   |           | -6.23682 | 8.28E-05 | 0.003779 |
| ENSMUSG(Spi1      |           | -6.19002 | 6.18E-10 | 1.68E-07 |
| ENSMUSG(Pkd2l1    |           | -6.18733 | 1.08E-07 | 1.46E-05 |
| ENSMUSG(Spef2     |           | -6.17151 | 6.75E-06 | 0.000471 |
| ENSMUSG(Nrk       |           | -6.0115  | 0.000261 | 0.009605 |
| ENSMUSG(Mpp4      |           | -5.94979 | 3.55E-10 | 1.06E-07 |
| ENSMUSG(Gm38260   |           | -5.90297 | 0.000265 | 0.009693 |
| ENSMUSG(Pdlim1    |           | -5.82376 | 4.38E-15 | 6.13E-12 |
| ENSMUSG(Fgf2      |           | -5.77165 | 8.43E-06 | 0.000559 |
| ENSMUSG(Igf2      |           | -5.75527 | 2.45E-08 | 4.11E-06 |
| ENSMUSG(Serpinb8  |           | -5.71814 | 6.70E-05 | 0.003187 |
| ENSMUSG(Paqr5     |           | -5.69368 | 0.000115 | 0.004956 |
| ENSMUSG(Pcdhgb8   |           | -5.68369 | 7.38E-06 | 0.000504 |
| ENSMUSG(Ppl       |           | -5.63137 | 0.001025 | 0.027926 |
| ENSMUSG(Eya4      |           | -5.59893 | 7.89E-06 | 0.00053  |
| ENSMUSG(Gm38103   |           | -5.5608  | 0.000274 | 0.009949 |
| ENSMUSG(Echdc3    |           | -5.45174 | 5.67E-06 | 0.000407 |
| ENSMUSG(Hcls1     |           | -5.45124 | 6.97E-06 | 0.000482 |
| ENSMUSG(Gmfg      |           | -5.41435 | 0.001098 | 0.029465 |
| ENSMUSG(Rhod      |           | -5.40237 | 1.76E-06 | 0.000149 |
| ENSMUSG(Cd33      |           | -5.39427 | 7.41E-05 | 0.003455 |
| ENSMUSG(Ppp1r36   |           | -5.36677 | 0.000886 | 0.024922 |
| ENSMUSG(Hey2      |           | -5.34546 | 6.61E-07 | 6.54E-05 |
| ENSMUSG(Tnfaip8l2 |           | -5.31581 | 3.52E-05 | 0.00189  |
| ENSMUSG(Gm37233   |           | -5.30637 | 0.002285 | 0.049782 |
| ENSMUSG(Gm5864    |           | -5.28825 | 2.68E-08 | 4.41E-06 |
| ENSMUSG(Plekhg2   |           | -5.25784 | 0.002285 | 0.049782 |
| ENSMUSG(Car5b     |           | -5.19257 | 1.85E-05 | 0.0011   |
| ENSMUSG(Tmem173   |           | -5.18847 | 0.000153 | 0.006322 |
| ENSMUSG(Bin2      |           | -5.11976 | 1.45E-07 | 1.87E-05 |
| ENSMUSG(Dmbx1     |           | -4.98144 | 4.52E-07 | 4.83E-05 |
| ENSMUSG(Sox14     |           | -4.90977 | 5.69E-06 | 0.000408 |
| ENSMUSG(mt-Tv     |           | -4.90011 | 1.69E-06 | 0.000144 |
| ENSMUSG(Slc32a1   |           | -4.89588 | 3.89E-07 | 4.27E-05 |
| ENSMUSG(Icam1     |           | -4.88452 | 0.000252 | 0.009318 |
| ENSMUSG(Fcer1g    |           | -4.87666 | 4.53E-08 | 7.07E-06 |
| ENSMUSG(Gcnt1     |           | -4.84018 | 0.000225 | 0.00854  |
| ENSMUSG(Hvcn1     |           | -4.82402 | 7.01E-05 | 0.003289 |
| ENSMUSG(Hmgcs2    |           | -4.81701 | 8.07E-07 | 7.79E-05 |
| ENSMUSG(Lrrc74b   |           | -4.81344 | 0.001643 | 0.039235 |
| ENSMUSG(Ocln      |           | -4.79672 | 5.16E-08 | 7.82E-06 |

|                   |          |          |          |
|-------------------|----------|----------|----------|
| ENSMUSG(mt-Tk     | -4.76499 | 8.10E-06 | 0.000541 |
| ENSMUSG(Aif1l     | -4.75666 | 4.52E-12 | 2.38E-09 |
| ENSMUSG(Slc39a8   | -4.7466  | 3.26E-06 | 0.00025  |
| ENSMUSG(Lefty1    | -4.74602 | 0.000387 | 0.013094 |
| ENSMUSG(Ecm2      | -4.73379 | 2.50E-06 | 0.0002   |
| ENSMUSG(Arap1     | -4.68947 | 9.10E-10 | 2.32E-07 |
| ENSMUSG(Ttc23     | -4.68796 | 3.32E-06 | 0.000253 |
| ENSMUSG(Iltifb    | -4.68095 | 0.002248 | 0.04918  |
| ENSMUSG(Arhgap11a | -4.67462 | 0.000296 | 0.010596 |
| ENSMUSG(Hoxc4     | -4.67017 | 0.000512 | 0.016105 |
| ENSMUSG(Tm4sf4    | -4.66833 | 0.000884 | 0.024922 |
| ENSMUSG(Sp7       | -4.66647 | 0.000206 | 0.007986 |
| ENSMUSG(B230344G1 | -4.62213 | 0.00049  | 0.015604 |
| ENSMUSG(P2ry6     | -4.60613 | 0.000317 | 0.011205 |
| ENSMUSG(Cd53      | -4.59888 | 5.00E-07 | 5.22E-05 |
| ENSMUSG(Lrp2      | -4.58444 | 0.001348 | 0.034044 |
| ENSMUSG(Klh6      | -4.56208 | 0.000144 | 0.006027 |
| ENSMUSG(Stard8    | -4.55192 | 9.96E-06 | 0.000644 |
| ENSMUSG(Ptprc     | -4.54928 | 9.50E-05 | 0.004223 |
| ENSMUSG(Wdr72     | -4.5244  | 0.001238 | 0.031966 |
| ENSMUSG(Xlr       | -4.50983 | 0.001154 | 0.030514 |
| ENSMUSG(Fcgr3     | -4.49788 | 1.70E-06 | 0.000144 |
| ENSMUSG(Tst       | -4.49005 | 9.48E-14 | 8.96E-11 |
| ENSMUSG(Sp100     | -4.48555 | 0.001114 | 0.029647 |
| ENSMUSG(Gm43201   | -4.47573 | 0.000603 | 0.018342 |
| ENSMUSG(Ehd2      | -4.45892 | 7.49E-07 | 7.32E-05 |
| ENSMUSG(Fli1      | -4.45312 | 2.98E-05 | 0.001639 |
| ENSMUSG(C3ar1     | -4.4439  | 6.35E-05 | 0.003075 |
| ENSMUSG(Papss2    | -4.43494 | 8.52E-08 | 1.17E-05 |
| ENSMUSG(Crybb1    | -4.43079 | 8.56E-07 | 8.19E-05 |
| ENSMUSG(Parp3     | -4.4267  | 8.83E-07 | 8.35E-05 |
| ENSMUSG(Clec5a    | -4.42595 | 0.000483 | 0.015433 |
| ENSMUSG(Gm43336   | -4.41015 | 0.002107 | 0.046816 |
| ENSMUSG(Sds       | -4.40776 | 9.28E-05 | 0.004152 |
| ENSMUSG(Uaca      | -4.4052  | 0.000186 | 0.0074   |
| ENSMUSG(Adhfe1    | -4.40426 | 9.43E-14 | 8.96E-11 |
| ENSMUSG(Slc2a10   | -4.3782  | 5.97E-05 | 0.002921 |
| ENSMUSG(mt-Tr     | -4.36436 | 2.70E-09 | 5.90E-07 |
| ENSMUSG(Anxa2     | -4.36182 | 1.20E-12 | 8.02E-10 |
| ENSMUSG(Chdh      | -4.33143 | 7.21E-06 | 0.000496 |
| ENSMUSG(Tagln     | -4.32682 | 1.17E-05 | 0.000741 |
| ENSMUSG(Lum       | -4.32508 | 5.12E-06 | 0.000373 |
| ENSMUSG(mt-Tg     | -4.32118 | 1.27E-08 | 2.35E-06 |
| ENSMUSG(Aif1      | -4.32084 | 6.82E-07 | 6.72E-05 |
| ENSMUSG(Ptpn14    | -4.32068 | 3.06E-05 | 0.00168  |
| ENSMUSG(Slfn2     | -4.2985  | 6.62E-06 | 0.000462 |
| ENSMUSG(Epx       | -4.29555 | 0.000158 | 0.006478 |

|                    |          |          |          |
|--------------------|----------|----------|----------|
| ENSMUSGC Kcne11    | -4.28482 | 3.93E-12 | 2.10E-09 |
| ENSMUSGC Ctss      | -4.27994 | 1.77E-14 | 2.27E-11 |
| ENSMUSGC Lyz2      | -4.25997 | 2.96E-07 | 3.44E-05 |
| ENSMUSGC Acsbg1    | -4.24254 | 5.86E-11 | 2.30E-08 |
| ENSMUSGC Lfng      | -4.23337 | 5.16E-07 | 5.33E-05 |
| ENSMUSGC Fcrls     | -4.208   | 3.52E-05 | 0.00189  |
| ENSMUSGC Myh11     | -4.15938 | 0.000982 | 0.026961 |
| ENSMUSGC Pdgfrl    | -4.15571 | 0.001433 | 0.035487 |
| ENSMUSGC Grap      | -4.15377 | 1.21E-05 | 0.000765 |
| ENSMUSGC Abca9     | -4.14629 | 0.000278 | 0.010087 |
| ENSMUSGC Trh       | -4.13092 | 0.000168 | 0.006802 |
| ENSMUSGC Lat2      | -4.13068 | 0.000225 | 0.00854  |
| ENSMUSGC Gm38309   | -4.11985 | 0.000224 | 0.008515 |
| ENSMUSGC mt-Td     | -4.11559 | 0.000135 | 0.005725 |
| ENSMUSGC Nat1      | -4.10457 | 4.38E-06 | 0.000326 |
| ENSMUSGC Hist1h2bc | -4.10243 | 6.47E-16 | 1.83E-12 |
| ENSMUSGC Acss3     | -4.10213 | 1.41E-05 | 0.00087  |
| ENSMUSGC C1qb      | -4.09494 | 4.08E-15 | 5.95E-12 |
| ENSMUSGC Pdlim2    | -4.09274 | 3.79E-15 | 5.79E-12 |
| ENSMUSGC Abi3      | -4.09271 | 3.25E-06 | 0.00025  |
| ENSMUSGC Phgdh     | -4.09044 | 1.35E-16 | 5.44E-13 |
| ENSMUSGC S100a13   | -4.08811 | 5.54E-08 | 8.26E-06 |
| ENSMUSGC Fam107a   | -4.0677  | 5.02E-13 | 3.84E-10 |
| ENSMUSGC Txnip     | -4.06504 | 1.83E-05 | 0.00109  |
| ENSMUSGC Gm7901    | -4.0647  | 3.08E-14 | 3.30E-11 |
| ENSMUSGC Plin3     | -4.06399 | 1.37E-15 | 2.90E-12 |
| ENSMUSGC Fabp7     | -4.04284 | 1.75E-13 | 1.52E-10 |
| ENSMUSGC Glis3     | -4.04171 | 0.00053  | 0.01657  |
| ENSMUSGC S100a1    | -4.03351 | 2.65E-14 | 3.16E-11 |
| ENSMUSGC Gm38299   | -4.0092  | 0.001743 | 0.040622 |
| ENSMUSGC Prrx1     | -4.00401 | 3.82E-05 | 0.00201  |
| ENSMUSGC Srgn      | -4.00108 | 0.001011 | 0.02766  |
| ENSMUSGC Trp63     | -3.99354 | 0.000107 | 0.004664 |
| ENSMUSGC Slc9a3r1  | -3.99276 | 7.18E-17 | 3.30E-13 |
| ENSMUSGC Irf6      | -3.98836 | 0.001972 | 0.044717 |
| ENSMUSGC Trim30a   | -3.98581 | 0.001212 | 0.031561 |
| ENSMUSGC Ptpn6     | -3.97344 | 3.91E-06 | 0.000294 |
| ENSMUSGC Gm10687   | -3.95508 | 0.002218 | 0.048776 |
| ENSMUSGC Acta2     | -3.95074 | 7.87E-07 | 7.64E-05 |
| ENSMUSGC Fas       | -3.94396 | 4.94E-05 | 0.002475 |
| ENSMUSGC Tmem119   | -3.94388 | 4.50E-06 | 0.000332 |
| ENSMUSGC Cldn10    | -3.93916 | 2.71E-12 | 1.56E-09 |
| ENSMUSGC Slc25a18  | -3.93652 | 3.35E-15 | 5.39E-12 |
| ENSMUSGC Ogn       | -3.92133 | 0.000624 | 0.018854 |
| ENSMUSGC Acsf2     | -3.90781 | 7.38E-06 | 0.000504 |
| ENSMUSGC Galm      | -3.89937 | 1.64E-05 | 0.000993 |
| ENSMUSGC P2ry13    | -3.89601 | 2.95E-05 | 0.001629 |

|                   |          |          |          |
|-------------------|----------|----------|----------|
| ENSMUSG( Rfx4     | -3.89413 | 9.83E-10 | 2.46E-07 |
| ENSMUSG( mt-Tt    | -3.88846 | 0.000878 | 0.024851 |
| ENSMUSG( Sparc    | -3.87811 | 2.23E-12 | 1.38E-09 |
| ENSMUSG( Mlc1     | -3.8759  | 4.94E-10 | 1.41E-07 |
| ENSMUSG( C1qc     | -3.86934 | 3.68E-12 | 2.07E-09 |
| ENSMUSG( C1qa     | -3.86136 | 1.04E-12 | 7.28E-10 |
| ENSMUSG( Gm9347   | -3.8533  | 5.29E-08 | 7.95E-06 |
| ENSMUSG( Gstt3    | -3.85296 | 1.49E-05 | 0.000912 |
| ENSMUSG( mt-Th    | -3.84885 | 4.52E-06 | 0.000333 |
| ENSMUSG( Apoe     | -3.84371 | 3.01E-15 | 5.36E-12 |
| ENSMUSG( Gm16499  | -3.84082 | 0.001899 | 0.043445 |
| ENSMUSG( Mdk      | -3.8296  | 1.83E-08 | 3.21E-06 |
| ENSMUSG( Bgn      | -3.82395 | 0.000262 | 0.009616 |
| ENSMUSG( Casq2    | -3.79815 | 0.000405 | 0.013505 |
| ENSMUSG( Epas1    | -3.79405 | 2.04E-09 | 4.64E-07 |
| ENSMUSG( Heph     | -3.78933 | 0.000119 | 0.005127 |
| ENSMUSG( Aldh1l1  | -3.78707 | 3.79E-12 | 2.10E-09 |
| ENSMUSG( Sox10    | -3.78371 | 9.27E-19 | 9.93E-15 |
| ENSMUSG( Itgam    | -3.77543 | 0.000274 | 0.009949 |
| ENSMUSG( S100a6   | -3.77161 | 2.43E-05 | 0.001389 |
| ENSMUSG( C1qtnf5  | -3.76951 | 4.70E-05 | 0.002371 |
| ENSMUSG( Havcr2   | -3.76583 | 0.000121 | 0.005196 |
| ENSMUSG( Spin4    | -3.76181 | 0.000609 | 0.018454 |
| ENSMUSG( Apod     | -3.76074 | 2.21E-14 | 2.73E-11 |
| ENSMUSG( Prob1    | -3.76051 | 0.000241 | 0.008993 |
| ENSMUSG( Dio2     | -3.75655 | 2.21E-07 | 2.66E-05 |
| ENSMUSG( Zfp820   | -3.75478 | 0.002209 | 0.048687 |
| ENSMUSG( Ankub1   | -3.74811 | 0.001743 | 0.040622 |
| ENSMUSG( Tns3     | -3.74749 | 1.20E-07 | 1.60E-05 |
| ENSMUSG( Ppp1r3g  | -3.74298 | 0.000226 | 0.008553 |
| ENSMUSG( Phyh1    | -3.7426  | 4.57E-07 | 4.87E-05 |
| ENSMUSG( Ppp1r14a | -3.7416  | 1.32E-11 | 5.96E-09 |
| ENSMUSG( Plcb3    | -3.74093 | 1.43E-10 | 4.83E-08 |
| ENSMUSG( Cdk5rap2 | -3.73537 | 8.28E-11 | 2.99E-08 |
| ENSMUSG( Csrp1    | -3.72886 | 2.24E-19 | 3.60E-15 |
| ENSMUSG( Klk6     | -3.72392 | 1.12E-09 | 2.74E-07 |
| ENSMUSG( mt-Rnr2  | -3.72289 | 1.80E-10 | 5.80E-08 |
| ENSMUSG( Foxb1    | -3.71745 | 0.000282 | 0.010218 |
| ENSMUSG( Klrg2    | -3.71114 | 4.25E-05 | 0.002187 |
| ENSMUSG( Slc14a1  | -3.70992 | 2.28E-12 | 1.38E-09 |
| ENSMUSG( Msx2     | -3.70765 | 0.000701 | 0.020855 |
| ENSMUSG( Lad1     | -3.69041 | 0.001475 | 0.036243 |
| ENSMUSG( Olfml3   | -3.69022 | 2.46E-08 | 4.11E-06 |
| ENSMUSG( Acsm5    | -3.6895  | 0.001391 | 0.034848 |
| ENSMUSG( Olig1    | -3.68944 | 6.50E-18 | 4.18E-14 |
| ENSMUSG( Gm4524   | -3.68519 | 0.000216 | 0.008287 |
| ENSMUSG( mt-Tl2   | -3.68501 | 4.14E-05 | 0.002145 |



|                    |          |          |          |
|--------------------|----------|----------|----------|
| ENSMUSG( Myo1f     | -3.67704 | 0.001006 | 0.027552 |
| ENSMUSG( Dock5     | -3.67131 | 0.001107 | 0.02956  |
| ENSMUSG( mt-Nd3    | -3.65552 | 7.36E-11 | 2.78E-08 |
| ENSMUSG( Col1a2    | -3.64275 | 2.50E-05 | 0.001424 |
| ENSMUSG( Gng12     | -3.63843 | 3.06E-14 | 3.30E-11 |
| ENSMUSG( Tor4a     | -3.63543 | 0.002034 | 0.045519 |
| ENSMUSG( Aldh1a1   | -3.63427 | 3.00E-14 | 3.30E-11 |
| ENSMUSG( Dbx2      | -3.62724 | 3.92E-12 | 2.10E-09 |
| ENSMUSG( Satb2     | -3.62123 | 0.001069 | 0.028783 |
| ENSMUSG( mt-Tl1    | -3.61242 | 7.74E-09 | 1.53E-06 |
| ENSMUSG( Car2      | -3.61075 | 9.79E-18 | 5.24E-14 |
| ENSMUSG( Gstk1     | -3.60182 | 1.18E-06 | 0.000105 |
| ENSMUSG( Etnppl    | -3.59231 | 3.79E-11 | 1.58E-08 |
| ENSMUSG( Pycard    | -3.59054 | 4.45E-05 | 0.002273 |
| ENSMUSG( Qprt      | -3.57754 | 0.001222 | 0.031711 |
| ENSMUSG( Laptm5    | -3.57439 | 1.57E-10 | 5.16E-08 |
| ENSMUSG( Tek       | -3.57081 | 0.000337 | 0.011711 |
| ENSMUSG( mt-Ti     | -3.56327 | 1.28E-06 | 0.000112 |
| ENSMUSG( Cd74      | -3.55965 | 3.40E-05 | 0.001838 |
| ENSMUSG( Fblim1    | -3.55334 | 0.001353 | 0.034119 |
| ENSMUSG( Pdlim4    | -3.55227 | 4.50E-06 | 0.000332 |
| ENSMUSG( Hsd11b1   | -3.55048 | 5.31E-05 | 0.002634 |
| ENSMUSG( Atp1a2    | -3.5476  | 1.04E-12 | 7.28E-10 |
| ENSMUSG( AC167565. | -3.54589 | 0.000293 | 0.010541 |
| ENSMUSG( Sdc4      | -3.5429  | 1.35E-12 | 8.69E-10 |
| ENSMUSG( Gas2l3    | -3.53988 | 0.000619 | 0.018714 |
| ENSMUSG( Slc6a11   | -3.53367 | 6.08E-12 | 3.05E-09 |
| ENSMUSG( Art3      | -3.53191 | 6.76E-05 | 0.003204 |
| ENSMUSG( Samd9l    | -3.52374 | 0.000324 | 0.011376 |
| ENSMUSG( Litaf     | -3.52345 | 3.70E-16 | 1.19E-12 |
| ENSMUSG( E130114P1 | -3.52084 | 1.41E-06 | 0.000122 |
| ENSMUSG( Gpr17     | -3.52048 | 0.000298 | 0.010644 |
| ENSMUSG( Kcnj10    | -3.51706 | 1.80E-10 | 5.80E-08 |
| ENSMUSG( Oaf       | -3.51622 | 0.000458 | 0.014896 |
| ENSMUSG( Mpeg1     | -3.51579 | 0.000209 | 0.008054 |
| ENSMUSG( Serpinb1a | -3.50633 | 2.06E-13 | 1.69E-10 |
| ENSMUSG( BC064078  | -3.50544 | 0.001871 | 0.043031 |
| ENSMUSG( Gsdmd     | -3.50533 | 0.000449 | 0.014647 |
| ENSMUSG( Bbox1     | -3.50303 | 9.96E-12 | 4.78E-09 |
| ENSMUSG( Scrg1     | -3.50077 | 3.21E-07 | 3.66E-05 |
| ENSMUSG( Ly86      | -3.49386 | 5.19E-06 | 0.000376 |
| ENSMUSG( Xdh       | -3.48567 | 0.000206 | 0.007986 |
| ENSMUSG( 2310022BC | -3.48544 | 1.05E-10 | 3.70E-08 |
| ENSMUSG( Hist1h2bg | -3.48518 | 1.40E-07 | 1.84E-05 |
| ENSMUSG( Gad1      | -3.48197 | 3.38E-13 | 2.65E-10 |
| ENSMUSG( Dock8     | -3.46541 | 6.80E-05 | 0.003214 |
| ENSMUSG( Pdk4      | -3.46119 | 4.34E-06 | 0.000324 |

|                    |          |          |          |
|--------------------|----------|----------|----------|
| ENSMUSGC Slc1a3    | -3.45684 | 2.39E-11 | 1.01E-08 |
| ENSMUSGC Cd38      | -3.45088 | 0.000438 | 0.014396 |
| ENSMUSGC Gbp2      | -3.44495 | 2.15E-05 | 0.001241 |
| ENSMUSGC Ncf2      | -3.44457 | 1.33E-05 | 0.000833 |
| ENSMUSGC Gpr3711   | -3.44308 | 7.96E-11 | 2.96E-08 |
| ENSMUSGC Plekha2   | -3.43277 | 2.18E-09 | 4.93E-07 |
| ENSMUSGC 2900052NC | -3.43197 | 1.06E-08 | 2.01E-06 |
| ENSMUSGC Npr3      | -3.43124 | 0.000447 | 0.01461  |
| ENSMUSGC Fa2h      | -3.43    | 8.24E-10 | 2.15E-07 |
| ENSMUSGC Xaf1      | -3.42626 | 8.80E-06 | 0.000578 |
| ENSMUSGC Cyp2j9    | -3.4221  | 2.51E-09 | 5.61E-07 |
| ENSMUSGC Lcat      | -3.41777 | 1.63E-08 | 2.94E-06 |
| ENSMUSGC Ermn      | -3.41728 | 1.43E-15 | 2.90E-12 |
| ENSMUSGC Dao       | -3.40711 | 0.001223 | 0.031721 |
| ENSMUSGC Acss1     | -3.40434 | 8.51E-08 | 1.17E-05 |
| ENSMUSGC Gfap      | -3.40138 | 1.06E-12 | 7.28E-10 |
| ENSMUSGC Ifi35     | -3.40035 | 2.88E-05 | 0.001603 |
| ENSMUSGC Ramp1     | -3.39622 | 1.14E-10 | 3.94E-08 |
| ENSMUSGC Ninj2     | -3.39119 | 4.24E-05 | 0.002187 |
| ENSMUSGC Bdh2      | -3.3882  | 4.33E-07 | 4.66E-05 |
| ENSMUSGC Rarres2   | -3.38748 | 0.001757 | 0.040839 |
| ENSMUSGC Inpp1     | -3.38741 | 1.34E-09 | 3.22E-07 |
| ENSMUSGC Slc25a34  | -3.38648 | 9.43E-07 | 8.84E-05 |
| ENSMUSGC Mgst1     | -3.38601 | 1.12E-09 | 2.74E-07 |
| ENSMUSGC Cyp2j12   | -3.37985 | 6.45E-06 | 0.000452 |
| ENSMUSGC Rftn2     | -3.37663 | 9.03E-09 | 1.76E-06 |
| ENSMUSGC Axl       | -3.3729  | 2.03E-10 | 6.39E-08 |
| ENSMUSGC Arhgap45  | -3.36944 | 0.000512 | 0.016104 |
| ENSMUSGC Irf8      | -3.36879 | 0.000359 | 0.012316 |
| ENSMUSGC Pla2g16   | -3.36867 | 3.94E-14 | 4.08E-11 |
| ENSMUSGC Tyrobp    | -3.36648 | 0.000205 | 0.007986 |
| ENSMUSGC Gm28438   | -3.35249 | 5.10E-08 | 7.81E-06 |
| ENSMUSGC Rbm12b1   | -3.3443  | 3.62E-05 | 0.001936 |
| ENSMUSGC Plekhf1   | -3.34286 | 7.55E-10 | 1.99E-07 |
| ENSMUSGC A930017K1 | -3.34049 | 0.000488 | 0.015561 |
| ENSMUSGC Olfr287   | -3.32926 | 7.72E-06 | 0.000521 |
| ENSMUSGC A330076CC | -3.31542 | 0.000899 | 0.025193 |
| ENSMUSGC Pxn       | -3.31535 | 3.48E-08 | 5.62E-06 |
| ENSMUSGC Pcp2      | -3.30621 | 3.44E-07 | 3.89E-05 |
| ENSMUSGC Agt       | -3.30479 | 3.35E-09 | 7.17E-07 |
| ENSMUSGC Fgfr3     | -3.29733 | 6.82E-16 | 1.83E-12 |
| ENSMUSGC Pax3      | -3.29383 | 0.00036  | 0.012321 |
| ENSMUSGC Efhd1     | -3.29158 | 8.88E-08 | 1.21E-05 |
| ENSMUSGC Sox8      | -3.29034 | 1.02E-11 | 4.80E-09 |
| ENSMUSGC mt-Nd4l   | -3.28833 | 9.78E-10 | 2.46E-07 |
| ENSMUSGC Cyp4v3    | -3.28395 | 1.40E-05 | 0.000868 |
| ENSMUSGC Cldn11    | -3.28116 | 1.53E-06 | 0.000132 |

|                   |          |          |          |
|-------------------|----------|----------|----------|
| ENSMUSG(Slc38a3   | -3.27977 | 2.19E-07 | 2.64E-05 |
| ENSMUSG(Lef1      | -3.27819 | 0.000976 | 0.026843 |
| ENSMUSG(Selpg     | -3.27411 | 5.68E-11 | 2.25E-08 |
| ENSMUSG(Heyl      | -3.2741  | 3.62E-10 | 1.07E-07 |
| ENSMUSG(Trim34a   | -3.27323 | 0.001109 | 0.029588 |
| ENSMUSG(Selenop   | -3.2728  | 1.04E-12 | 7.28E-10 |
| ENSMUSG(Lhx5      | -3.27133 | 2.03E-06 | 0.000166 |
| ENSMUSG(Lhx1os    | -3.2692  | 7.15E-07 | 7.01E-05 |
| ENSMUSG(Il33      | -3.26606 | 1.85E-13 | 1.56E-10 |
| ENSMUSG(Suclg2    | -3.26578 | 3.93E-08 | 6.22E-06 |
| ENSMUSG(Wipf1     | -3.26217 | 3.71E-07 | 4.11E-05 |
| ENSMUSG(Fmo1      | -3.2604  | 6.90E-08 | 9.85E-06 |
| ENSMUSG(Mylk      | -3.25355 | 8.15E-06 | 0.000543 |
| ENSMUSG(Mal       | -3.24094 | 5.64E-12 | 2.88E-09 |
| ENSMUSG(Epb41l2   | -3.23759 | 6.25E-05 | 0.003038 |
| ENSMUSG(Timp4     | -3.23283 | 6.42E-08 | 9.21E-06 |
| ENSMUSG(Plp1      | -3.23229 | 9.14E-09 | 1.77E-06 |
| ENSMUSG(Trim56    | -3.23218 | 0.000378 | 0.012854 |
| ENSMUSG(Dapp1     | -3.22606 | 0.000283 | 0.010227 |
| ENSMUSG(Wwtr1     | -3.2151  | 0.000321 | 0.011296 |
| ENSMUSG(Slc7a10   | -3.21359 | 1.98E-07 | 2.46E-05 |
| ENSMUSG(Sox5      | -3.20862 | 7.60E-09 | 1.52E-06 |
| ENSMUSG(Agmo      | -3.2065  | 0.000241 | 0.008976 |
| ENSMUSG(Htra3     | -3.20258 | 0.000265 | 0.009695 |
| ENSMUSG(BC026585  | -3.19932 | 2.50E-08 | 4.15E-06 |
| ENSMUSG(Nid1      | -3.19859 | 0.000433 | 0.014284 |
| ENSMUSG(Gpd1      | -3.1931  | 1.06E-11 | 4.95E-09 |
| ENSMUSG(Folh1     | -3.18633 | 1.47E-07 | 1.88E-05 |
| ENSMUSG(Wnt7a     | -3.18532 | 0.00024  | 0.008976 |
| ENSMUSG(Ctdsp2    | -3.18419 | 1.24E-08 | 2.30E-06 |
| ENSMUSG(Copz2     | -3.18076 | 1.48E-06 | 0.000128 |
| ENSMUSG(Igfbp2    | -3.17607 | 0.000125 | 0.00533  |
| ENSMUSG(Hist1h2be | -3.17536 | 1.45E-05 | 0.000891 |
| ENSMUSG(Opalin    | -3.17339 | 3.08E-09 | 6.63E-07 |
| ENSMUSG(Entpd1    | -3.17122 | 0.001428 | 0.035436 |
| ENSMUSG(Rgs5      | -3.16887 | 0.000188 | 0.007448 |
| ENSMUSG(Clic1     | -3.16353 | 5.99E-07 | 5.99E-05 |
| ENSMUSG(Paqr6     | -3.15851 | 2.60E-07 | 3.08E-05 |
| ENSMUSG(Lhx1      | -3.15815 | 0.001324 | 0.033617 |
| ENSMUSG(Ndrgr2    | -3.15318 | 9.10E-12 | 4.43E-09 |
| ENSMUSG(Vcam1     | -3.14585 | 4.80E-11 | 1.93E-08 |
| ENSMUSG(Hpgds     | -3.14496 | 1.42E-05 | 0.000871 |
| ENSMUSG(Hepacam   | -3.13986 | 1.13E-11 | 5.18E-09 |
| ENSMUSG(Ifitm3    | -3.13217 | 0.000234 | 0.008796 |
| ENSMUSG(Zfp385c   | -3.12855 | 0.00146  | 0.035975 |
| ENSMUSG(Csf1r     | -3.11744 | 4.81E-07 | 5.10E-05 |
| ENSMUSG(Aqp4      | -3.11544 | 1.65E-14 | 2.21E-11 |

|                   |          |          |          |
|-------------------|----------|----------|----------|
| ENSMUSG(Gpt       | -3.11455 | 5.21E-09 | 1.08E-06 |
| ENSMUSG(Aldh3b1   | -3.10808 | 1.24E-05 | 0.000781 |
| ENSMUSG(Gjb2      | -3.1056  | 7.78E-06 | 0.000524 |
| ENSMUSG(Tmem63a   | -3.10553 | 3.14E-06 | 0.000244 |
| ENSMUSG(Tgfb1     | -3.10408 | 0.00167  | 0.039558 |
| ENSMUSG(Myl9      | -3.09825 | 1.01E-07 | 1.37E-05 |
| ENSMUSG(Pax6      | -3.09798 | 9.09E-05 | 0.004096 |
| ENSMUSG(Tmbim1    | -3.09714 | 1.06E-10 | 3.72E-08 |
| ENSMUSG(Slc7a7    | -3.09317 | 0.001043 | 0.028328 |
| ENSMUSG(Bfsp2     | -3.09145 | 2.25E-06 | 0.000182 |
| ENSMUSG(Gja1      | -3.08944 | 1.36E-09 | 3.23E-07 |
| ENSMUSG(C030029HC | -3.08337 | 0.001995 | 0.044918 |
| ENSMUSG(Ucp3      | -3.07302 | 1.90E-05 | 0.001122 |
| ENSMUSG(mt-Tq     | -3.0726  | 0.000484 | 0.015473 |
| ENSMUSG(Rgl3      | -3.07258 | 0.000934 | 0.025896 |
| ENSMUSG(Sparcl1   | -3.0657  | 8.01E-11 | 2.96E-08 |
| ENSMUSG(Sardh     | -3.06529 | 0.001049 | 0.028415 |
| ENSMUSG(Vsir      | -3.06477 | 5.10E-05 | 0.002545 |
| ENSMUSG(2700046AC | -3.05735 | 0.001857 | 0.042775 |
| ENSMUSG(S100b     | -3.05698 | 1.79E-12 | 1.12E-09 |
| ENSMUSG(Pls1      | -3.05258 | 1.02E-08 | 1.95E-06 |
| ENSMUSG(Adamtsl4  | -3.05149 | 0.000838 | 0.024087 |
| ENSMUSG(Sult1a1   | -3.0492  | 9.18E-07 | 8.65E-05 |
| ENSMUSG(Nkx2-2    | -3.04712 | 0.000295 | 0.010568 |
| ENSMUSG(mt-Rnr1   | -3.04636 | 8.36E-08 | 1.16E-05 |
| ENSMUSG(Aspa      | -3.04605 | 9.98E-11 | 3.56E-08 |
| ENSMUSG(Irak3     | -3.04145 | 0.001402 | 0.035029 |
| ENSMUSG(Egfr      | -3.04071 | 0.001271 | 0.0326   |
| ENSMUSG(Plekho2   | -3.0321  | 1.10E-08 | 2.07E-06 |
| ENSMUSG(Spag5     | -3.03205 | 6.78E-06 | 0.000472 |
| ENSMUSG(Plekhh1   | -3.02872 | 6.60E-05 | 0.003155 |
| ENSMUSG(Sfrp5     | -3.02127 | 4.96E-07 | 5.20E-05 |
| ENSMUSG(Ezh2      | -3.01953 | 6.66E-05 | 0.003171 |
| ENSMUSG(Tifa      | -3.0159  | 1.05E-06 | 9.61E-05 |
| ENSMUSG(S1pr1     | -3.01465 | 4.22E-11 | 1.72E-08 |
| ENSMUSG(Ctsh      | -3.01046 | 5.28E-06 | 0.000382 |
| ENSMUSG(Sox9      | -3.01034 | 1.44E-09 | 3.41E-07 |
| ENSMUSG(Kcnj16    | -3.00866 | 6.39E-10 | 1.71E-07 |
| ENSMUSG(Rell1     | -3.004   | 0.000776 | 0.02258  |
| ENSMUSG(Cyba      | -3.00355 | 2.12E-05 | 0.001229 |
| ENSMUSG(Carhsp1   | -3.00197 | 4.78E-10 | 1.37E-07 |
| ENSMUSG(Id3       | -3.00101 | 8.57E-10 | 2.20E-07 |
| ENSMUSG(Cideb     | -2.99609 | 0.002186 | 0.048314 |
| ENSMUSG(Tnfrsf1a  | -2.99608 | 4.07E-05 | 0.002116 |
| ENSMUSG(Abca1     | -2.9923  | 4.94E-07 | 5.19E-05 |
| ENSMUSG(Slc1a2    | -2.98986 | 2.67E-09 | 5.87E-07 |
| ENSMUSG(Hhip      | -2.98825 | 0.000266 | 0.009739 |

|                  |          |          |          |
|------------------|----------|----------|----------|
| ENSMUSG(S100a16  | -2.98739 | 3.93E-10 | 1.15E-07 |
| ENSMUSG(Mfge8    | -2.98346 | 3.88E-07 | 4.27E-05 |
| ENSMUSG(Ddit4l   | -2.97469 | 0.002006 | 0.045075 |
| ENSMUSG(Dock1    | -2.97114 | 5.89E-08 | 8.64E-06 |
| ENSMUSG(Ii17ra   | -2.97085 | 0.000137 | 0.00579  |
| ENSMUSG(Gm40578  | -2.94781 | 0.000214 | 0.00822  |
| ENSMUSG(Pdgfra   | -2.94623 | 0.001233 | 0.031889 |
| ENSMUSG(Lgi4     | -2.94159 | 2.50E-06 | 0.0002   |
| ENSMUSG(Itih5    | -2.93626 | 3.04E-08 | 4.93E-06 |
| ENSMUSG(Arhgef10 | -2.93579 | 6.81E-09 | 1.38E-06 |
| ENSMUSG(Itih3    | -2.9306  | 1.31E-07 | 1.74E-05 |
| ENSMUSG(Calca    | -2.93045 | 6.02E-08 | 8.75E-06 |
| ENSMUSG(Slc30a3  | -2.92849 | 8.13E-08 | 1.13E-05 |
| ENSMUSG(Dennd4c  | -2.92663 | 0.000924 | 0.025713 |
| ENSMUSG(Itgb4    | -2.92619 | 0.002104 | 0.046798 |
| ENSMUSG(Gm10222  | -2.92514 | 2.11E-07 | 2.57E-05 |
| ENSMUSG(Sfxn5    | -2.92138 | 9.87E-10 | 2.46E-07 |
| ENSMUSG(Fcgrt    | -2.92084 | 8.04E-08 | 1.12E-05 |
| ENSMUSG(Ccdc190  | -2.92074 | 0.002044 | 0.045651 |
| ENSMUSG(Gatsl3   | -2.91787 | 1.34E-05 | 0.000834 |
| ENSMUSG(Slc39a12 | -2.91388 | 1.17E-09 | 2.84E-07 |
| ENSMUSG(Hadh     | -2.91336 | 5.29E-12 | 2.74E-09 |
| ENSMUSG(Acvrl1   | -2.91058 | 0.001274 | 0.0326   |
| ENSMUSG(Dmp1     | -2.90913 | 0.001665 | 0.039447 |
| ENSMUSG(Htra1    | -2.90392 | 1.03E-06 | 9.45E-05 |
| ENSMUSG(Cyp4f14  | -2.90199 | 9.72E-06 | 0.000631 |
| ENSMUSG(Plekhg3  | -2.89968 | 9.55E-09 | 1.84E-06 |
| ENSMUSG(Phkg1    | -2.89683 | 7.27E-08 | 1.03E-05 |
| ENSMUSG(Mro      | -2.89643 | 8.67E-07 | 8.27E-05 |
| ENSMUSG(Tmem100  | -2.89611 | 3.65E-09 | 7.77E-07 |
| ENSMUSG(Cmtm5    | -2.88284 | 5.25E-10 | 1.46E-07 |
| ENSMUSG(Elovl7   | -2.88234 | 1.13E-07 | 1.51E-05 |
| ENSMUSG(Mog      | -2.87907 | 3.57E-08 | 5.74E-06 |
| ENSMUSG(Lyn      | -2.87701 | 0.00201  | 0.045147 |
| ENSMUSG(Pygm     | -2.87596 | 0.000355 | 0.012194 |
| ENSMUSG(Amt      | -2.87509 | 0.000169 | 0.006843 |
| ENSMUSG(Anln     | -2.87248 | 4.75E-10 | 1.37E-07 |
| ENSMUSG(Magt1    | -2.87105 | 1.16E-06 | 0.000103 |
| ENSMUSG(Mboat1   | -2.87059 | 0.00193  | 0.043989 |
| ENSMUSG(mt-Tm    | -2.86575 | 0.000802 | 0.023166 |
| ENSMUSG(Hist1h1c | -2.8646  | 1.30E-07 | 1.73E-05 |
| ENSMUSG(Rlbp1    | -2.86445 | 1.37E-05 | 0.000852 |
| ENSMUSG(Vtn      | -2.86255 | 4.91E-07 | 5.19E-05 |
| ENSMUSG(Gpsm2    | -2.85224 | 0.000521 | 0.016301 |
| ENSMUSG(Gm10644  | -2.84985 | 0.001643 | 0.039235 |
| ENSMUSG(Homer3   | -2.84911 | 8.78E-07 | 8.32E-05 |
| ENSMUSG(Igsf11   | -2.84847 | 0.000227 | 0.008595 |

|                   |          |          |          |
|-------------------|----------|----------|----------|
| ENSMUSG(Cx3cr1    | -2.8481  | 0.000428 | 0.014152 |
| ENSMUSG(Prss35    | -2.84767 | 0.000206 | 0.007986 |
| ENSMUSG(Colec12   | -2.84349 | 0.002266 | 0.049444 |
| ENSMUSG(Snap23    | -2.84145 | 1.17E-05 | 0.000744 |
| ENSMUSG(Padi2     | -2.83873 | 5.15E-10 | 1.45E-07 |
| ENSMUSG(Ppp1r1b   | -2.83446 | 1.47E-11 | 6.38E-09 |
| ENSMUSG(Gstm2-ps1 | -2.83279 | 5.28E-10 | 1.46E-07 |
| ENSMUSG(Gng11     | -2.82817 | 6.40E-09 | 1.32E-06 |
| ENSMUSG(Naprt     | -2.82593 | 0.000114 | 0.004927 |
| ENSMUSG(Pctp      | -2.82581 | 8.71E-06 | 0.000574 |
| ENSMUSG(Gm14204   | -2.82549 | 8.04E-05 | 0.00368  |
| ENSMUSG(Cp        | -2.817   | 0.001909 | 0.043604 |
| ENSMUSG(Tmem51    | -2.81649 | 0.00171  | 0.040136 |
| ENSMUSG(A2m       | -2.81597 | 0.000165 | 0.00671  |
| ENSMUSG(Gstm1     | -2.81291 | 2.48E-12 | 1.45E-09 |
| ENSMUSG(Rbp1      | -2.81251 | 0.000172 | 0.006942 |
| ENSMUSG(Lmcd1     | -2.81174 | 3.02E-07 | 3.49E-05 |
| ENSMUSG(Ttyh2     | -2.81118 | 6.22E-07 | 6.19E-05 |
| ENSMUSG(Slc17a7   | -2.80961 | 6.05E-06 | 0.000429 |
| ENSMUSG(Gm8834    | -2.80838 | 3.47E-05 | 0.001869 |
| ENSMUSG(Prkd3     | -2.80835 | 6.13E-07 | 6.12E-05 |
| ENSMUSG(Slc6a5    | -2.80513 | 9.12E-05 | 0.004105 |
| ENSMUSG(Rhog      | -2.80473 | 1.48E-09 | 3.48E-07 |
| ENSMUSG(Tnfaip6   | -2.80262 | 3.23E-07 | 3.67E-05 |
| ENSMUSG(Cpt1a     | -2.79996 | 2.43E-06 | 0.000195 |
| ENSMUSG(Gm5637    | -2.79653 | 0.001783 | 0.041304 |
| ENSMUSG(Tmem98    | -2.79634 | 5.34E-07 | 5.49E-05 |
| ENSMUSG(Ddx58     | -2.79622 | 0.00025  | 0.009265 |
| ENSMUSG(Metrn     | -2.79152 | 2.31E-08 | 3.93E-06 |
| ENSMUSG(Glul      | -2.78463 | 7.07E-12 | 3.50E-09 |
| ENSMUSG(Gjc3      | -2.77526 | 1.06E-06 | 9.61E-05 |
| ENSMUSG(mt-Atp6   | -2.77224 | 2.96E-06 | 0.000232 |
| ENSMUSG(Serpinh1  | -2.76269 | 0.000862 | 0.02457  |
| ENSMUSG(Cpne3     | -2.76247 | 6.45E-07 | 6.40E-05 |
| ENSMUSG(Caskin2   | -2.75847 | 5.24E-07 | 5.39E-05 |
| ENSMUSG(Qk        | -2.75308 | 1.40E-11 | 6.18E-09 |
| ENSMUSG(Cd9       | -2.74972 | 1.32E-07 | 1.74E-05 |
| ENSMUSG(P2ry12    | -2.74944 | 3.13E-06 | 0.000244 |
| ENSMUSG(Scd1      | -2.74831 | 3.79E-09 | 7.97E-07 |
| ENSMUSG(Tcn2      | -2.74759 | 3.13E-05 | 0.001711 |
| ENSMUSG(Mfsd2a    | -2.74666 | 1.36E-06 | 0.000118 |
| ENSMUSG(Acot11    | -2.74472 | 5.14E-08 | 7.82E-06 |
| ENSMUSG(Nrarp     | -2.73948 | 3.91E-07 | 4.27E-05 |
| ENSMUSG(Nkx2-9    | -2.73943 | 0.00045  | 0.01468  |
| ENSMUSG(Clic4     | -2.73778 | 1.96E-10 | 6.24E-08 |
| ENSMUSG(Myoc      | -2.73313 | 2.68E-05 | 0.001507 |
| ENSMUSG(Cyfip1    | -2.73157 | 3.08E-07 | 3.53E-05 |

|                   |          |          |          |
|-------------------|----------|----------|----------|
| ENSMUSGC Acadl    | -2.73051 | 1.60E-09 | 3.72E-07 |
| ENSMUSGC Ptgds    | -2.72838 | 2.70E-06 | 0.000214 |
| ENSMUSGC Col9a3   | -2.7273  | 4.48E-05 | 0.002281 |
| ENSMUSGC Myrf     | -2.72379 | 2.44E-06 | 0.000195 |
| ENSMUSGC Daam2    | -2.71915 | 5.89E-06 | 0.000421 |
| ENSMUSGC Bmp7     | -2.71873 | 0.000285 | 0.010274 |
| ENSMUSGC Nde1     | -2.71358 | 1.09E-08 | 2.07E-06 |
| ENSMUSGC Cbs      | -2.71323 | 3.11E-10 | 9.33E-08 |
| ENSMUSGC Arhgef19 | -2.71164 | 2.90E-07 | 3.39E-05 |
| ENSMUSGC Vamp8    | -2.71148 | 0.000112 | 0.004864 |
| ENSMUSGC Pla2g7   | -2.71068 | 3.78E-09 | 7.97E-07 |
| ENSMUSGC Cnp      | -2.6954  | 2.46E-09 | 5.53E-07 |
| ENSMUSGC Kif13b   | -2.69528 | 4.25E-08 | 6.69E-06 |
| ENSMUSGC Plce1    | -2.69459 | 1.85E-06 | 0.000155 |
| ENSMUSGC Sall1    | -2.69352 | 2.90E-05 | 0.001606 |
| ENSMUSGC Serping1 | -2.68575 | 9.31E-06 | 0.000608 |
| ENSMUSGC Tmem88b  | -2.6857  | 7.53E-09 | 1.51E-06 |
| ENSMUSGC Phactr4  | -2.6822  | 0.00116  | 0.03058  |
| ENSMUSGC Gjb6     | -2.67571 | 1.90E-08 | 3.30E-06 |
| ENSMUSGC Olfml1   | -2.67397 | 2.21E-05 | 0.001265 |
| ENSMUSGC Cyp2d22  | -2.6667  | 2.95E-07 | 3.44E-05 |
| ENSMUSGC Etv4     | -2.66667 | 0.000112 | 0.004871 |
| ENSMUSGC Pgghg    | -2.66533 | 0.000109 | 0.004759 |
| ENSMUSGC Gjc2     | -2.66456 | 6.39E-06 | 0.000449 |
| ENSMUSGC Cryab    | -2.65751 | 4.18E-11 | 1.72E-08 |
| ENSMUSGC Capg     | -2.65333 | 0.000153 | 0.006322 |
| ENSMUSGC Trf      | -2.65274 | 1.18E-06 | 0.000105 |
| ENSMUSGC Zfp36l2  | -2.65022 | 6.40E-05 | 0.003085 |
| ENSMUSGC Tlcd1    | -2.64693 | 6.04E-06 | 0.000429 |
| ENSMUSGC Pxmp2    | -2.64434 | 7.52E-05 | 0.003494 |
| ENSMUSGC Tspan15  | -2.64427 | 2.24E-06 | 0.000182 |
| ENSMUSGC Cfh      | -2.64251 | 0.001058 | 0.028583 |
| ENSMUSGC Gatm     | -2.63582 | 8.11E-11 | 2.96E-08 |
| ENSMUSGC Stard13  | -2.63568 | 3.40E-06 | 0.000258 |
| ENSMUSGC Efemp1   | -2.63169 | 3.09E-05 | 0.001693 |
| ENSMUSGC Apln     | -2.62914 | 8.50E-07 | 8.15E-05 |
| ENSMUSGC Skor1    | -2.62905 | 0.000599 | 0.018231 |
| ENSMUSGC Eva1a    | -2.62627 | 1.43E-07 | 1.87E-05 |
| ENSMUSGC Cyp26b1  | -2.6188  | 0.000337 | 0.011711 |
| ENSMUSGC Gm15163  | -2.61644 | 5.70E-05 | 0.002804 |
| ENSMUSGC Car8     | -2.61296 | 1.54E-10 | 5.10E-08 |
| ENSMUSGC Cdc42ep1 | -2.60886 | 1.89E-07 | 2.37E-05 |
| ENSMUSGC Slc15a2  | -2.59346 | 1.41E-05 | 0.000869 |
| ENSMUSGC Trim25   | -2.59086 | 4.81E-05 | 0.002419 |
| ENSMUSGC Abhd3    | -2.59013 | 2.60E-09 | 5.77E-07 |
| ENSMUSGC C4b      | -2.58859 | 1.77E-06 | 0.000149 |
| ENSMUSGC Selenbp1 | -2.58706 | 2.11E-07 | 2.57E-05 |

|                  |          |          |          |
|------------------|----------|----------|----------|
| ENSMUSG(Nkx6-2   | -2.58669 | 1.72E-08 | 3.09E-06 |
| ENSMUSG(Dnaic1   | -2.58479 | 0.00058  | 0.017748 |
| ENSMUSG(Ssfa2    | -2.58459 | 3.69E-07 | 4.10E-05 |
| ENSMUSG(Kat2b    | -2.57887 | 9.84E-07 | 9.11E-05 |
| ENSMUSG(Pbxip1   | -2.57438 | 1.44E-10 | 4.83E-08 |
| ENSMUSG(Zc3hav1  | -2.57306 | 2.51E-06 | 0.0002   |
| ENSMUSG(Trem2    | -2.57238 | 6.38E-05 | 0.003084 |
| ENSMUSG(Nfia     | -2.56818 | 5.09E-07 | 5.28E-05 |
| ENSMUSG(Plpp3    | -2.56745 | 3.73E-07 | 4.12E-05 |
| ENSMUSG(Sgk1     | -2.56377 | 1.74E-09 | 4.00E-07 |
| ENSMUSG(Plip     | -2.56177 | 3.16E-06 | 0.000245 |
| ENSMUSG(Prkd1    | -2.56075 | 0.000234 | 0.008796 |
| ENSMUSG(Eya1     | -2.55961 | 5.66E-06 | 0.000407 |
| ENSMUSG(Gm42756  | -2.55406 | 0.000689 | 0.020543 |
| ENSMUSG(Rab31    | -2.55343 | 1.17E-10 | 4.00E-08 |
| ENSMUSG(Tnfaip8  | -2.55094 | 2.08E-05 | 0.001208 |
| ENSMUSG(Sash1    | -2.55083 | 5.44E-07 | 5.55E-05 |
| ENSMUSG(Inpp5d   | -2.54966 | 0.000676 | 0.020223 |
| ENSMUSG(Lamb2    | -2.54924 | 1.99E-06 | 0.000164 |
| ENSMUSG(Lpcat2   | -2.54889 | 1.08E-06 | 9.73E-05 |
| ENSMUSG(Lims2    | -2.54882 | 8.75E-07 | 8.32E-05 |
| ENSMUSG(Eps8l2   | -2.54399 | 0.000109 | 0.004765 |
| ENSMUSG(Npepl1   | -2.54273 | 6.74E-05 | 0.003201 |
| ENSMUSG(Ppp1r3c  | -2.54192 | 1.57E-07 | 1.99E-05 |
| ENSMUSG(Ctsc     | -2.54103 | 4.84E-05 | 0.002426 |
| ENSMUSG(Abhd4    | -2.54062 | 1.81E-07 | 2.28E-05 |
| ENSMUSG(Lrig1    | -2.53701 | 4.31E-08 | 6.76E-06 |
| ENSMUSG(Nfix     | -2.53495 | 2.43E-07 | 2.89E-05 |
| ENSMUSG(Arhgap31 | -2.53469 | 2.02E-06 | 0.000166 |
| ENSMUSG(Mt2      | -2.53462 | 9.07E-06 | 0.000594 |
| ENSMUSG(Tmc6     | -2.5324  | 0.000713 | 0.021067 |
| ENSMUSG(Zfp36l1  | -2.53181 | 6.51E-05 | 0.003124 |
| ENSMUSG(Lhfp     | -2.53024 | 2.72E-05 | 0.001527 |
| ENSMUSG(Rbl1     | -2.5239  | 0.001418 | 0.035331 |
| ENSMUSG(Sapcd2   | -2.52342 | 0.000726 | 0.021354 |
| ENSMUSG(Cnn3     | -2.52319 | 6.25E-10 | 1.69E-07 |
| ENSMUSG(AI464131 | -2.52283 | 2.13E-05 | 0.00123  |
| ENSMUSG(Dab2     | -2.52084 | 5.44E-05 | 0.002683 |
| ENSMUSG(Gltp     | -2.51701 | 1.30E-08 | 2.38E-06 |
| ENSMUSG(Jph1     | -2.51681 | 2.07E-05 | 0.001208 |
| ENSMUSG(Insc     | -2.51608 | 3.80E-05 | 0.002004 |
| ENSMUSG(Akna     | -2.50754 | 0.001165 | 0.030644 |
| ENSMUSG(Wfdc1    | -2.50537 | 0.000841 | 0.024129 |
| ENSMUSG(Ccdc122  | -2.50319 | 0.000559 | 0.01726  |
| ENSMUSG(Boc      | -2.50224 | 0.001786 | 0.041344 |
| ENSMUSG(Elovl1   | -2.50197 | 0.0002   | 0.007854 |
| ENSMUSG(Gm28035  | -2.4934  | 0.00076  | 0.022186 |



|                     |          |          |          |
|---------------------|----------|----------|----------|
| ENSMUSG(C Timp3     | -2.49206 | 1.33E-06 | 0.000116 |
| ENSMUSG(C Mpst      | -2.49049 | 3.40E-05 | 0.001838 |
| ENSMUSG(C Pnpla7    | -2.48966 | 6.87E-06 | 0.000476 |
| ENSMUSG(C Rgma      | -2.48955 | 0.00143  | 0.035466 |
| ENSMUSG(C Cd82      | -2.48649 | 5.55E-07 | 5.62E-05 |
| ENSMUSG(C Gab1      | -2.48408 | 1.07E-06 | 9.70E-05 |
| ENSMUSG(C Mertk     | -2.48339 | 4.03E-05 | 0.0021   |
| ENSMUSG(C Myo6      | -2.48181 | 2.73E-08 | 4.47E-06 |
| ENSMUSG(C Evi2a     | -2.47724 | 5.38E-05 | 0.002659 |
| ENSMUSG(C Thbs2     | -2.47338 | 0.001584 | 0.038154 |
| ENSMUSG(C Glns-ps1  | -2.47047 | 0.000172 | 0.006925 |
| ENSMUSG(C Tril      | -2.46677 | 4.86E-08 | 7.54E-06 |
| ENSMUSG(C Prr5l     | -2.4644  | 2.10E-07 | 2.57E-05 |
| ENSMUSG(C F3        | -2.46093 | 1.45E-07 | 1.87E-05 |
| ENSMUSG(C Dcn       | -2.45675 | 9.77E-05 | 0.004311 |
| ENSMUSG(C Fxyd1     | -2.45425 | 7.28E-05 | 0.003409 |
| ENSMUSG(C Rasgrp3   | -2.45211 | 0.001021 | 0.02784  |
| ENSMUSG(C Sorbs3    | -2.44915 | 5.80E-08 | 8.55E-06 |
| ENSMUSG(C Mitf      | -2.44739 | 0.000302 | 0.010766 |
| ENSMUSG(C Rcsd1     | -2.44275 | 0.000121 | 0.005196 |
| ENSMUSG(C D7Ert443i | -2.43869 | 0.000692 | 0.020636 |
| ENSMUSG(C A230001M  | -2.43817 | 0.000365 | 0.012442 |
| ENSMUSG(C Tmem125   | -2.43683 | 1.89E-06 | 0.000158 |
| ENSMUSG(C Arhgef26  | -2.43471 | 1.67E-06 | 0.000142 |
| ENSMUSG(C Mag       | -2.43226 | 1.49E-05 | 0.000912 |
| ENSMUSG(C Dcx       | -2.4281  | 2.58E-05 | 0.001456 |
| ENSMUSG(C Acap2     | -2.42696 | 2.21E-05 | 0.001265 |
| ENSMUSG(C Arpc1b    | -2.42347 | 0.000327 | 0.011462 |
| ENSMUSG(C Bmpr1b    | -2.42059 | 6.13E-05 | 0.002992 |
| ENSMUSG(C Myo1d     | -2.41973 | 3.72E-06 | 0.000281 |
| ENSMUSG(C Mical1    | -2.41623 | 0.000245 | 0.009119 |
| ENSMUSG(C Gad2      | -2.41146 | 1.70E-09 | 3.93E-07 |
| ENSMUSG(C Ugt8a     | -2.41138 | 4.25E-05 | 0.002187 |
| ENSMUSG(C Sgk2      | -2.41082 | 0.000442 | 0.014483 |
| ENSMUSG(C Vstm4     | -2.41057 | 2.75E-05 | 0.001535 |
| ENSMUSG(C Rn7s2     | -2.40807 | 0.000285 | 0.010274 |
| ENSMUSG(C Gpr34     | -2.407   | 0.000184 | 0.007335 |
| ENSMUSG(C Igsf1     | -2.40578 | 7.02E-06 | 0.000484 |
| ENSMUSG(C Gm26694   | -2.40223 | 0.000116 | 0.00499  |
| ENSMUSG(C Nemp2     | -2.40134 | 0.00229  | 0.049854 |
| ENSMUSG(C Sod3      | -2.39907 | 4.07E-05 | 0.002116 |
| ENSMUSG(C Tjp2      | -2.39886 | 1.33E-06 | 0.000116 |
| ENSMUSG(C Slco1c1   | -2.39827 | 0.000182 | 0.007291 |
| ENSMUSG(C Cldn14    | -2.39734 | 0.000531 | 0.016585 |
| ENSMUSG(C Cyth4     | -2.39705 | 1.58E-05 | 0.000959 |
| ENSMUSG(C Igfbp7    | -2.39524 | 0.000165 | 0.00671  |
| ENSMUSG(C Tmod1     | -2.39502 | 1.89E-05 | 0.001116 |

|                    |          |          |          |
|--------------------|----------|----------|----------|
| ENSMUSGC Anxa3     | -2.39359 | 8.47E-05 | 0.003861 |
| ENSMUSGC Ednrb     | -2.38874 | 1.12E-07 | 1.51E-05 |
| ENSMUSGC Scara3    | -2.38536 | 0.001067 | 0.028756 |
| ENSMUSGC Zfyve21   | -2.38263 | 1.83E-07 | 2.30E-05 |
| ENSMUSGC Emp2      | -2.38103 | 4.78E-06 | 0.00035  |
| ENSMUSGC Tnni1     | -2.37856 | 0.000234 | 0.008796 |
| ENSMUSGC Mt1       | -2.37587 | 7.00E-08 | 9.96E-06 |
| ENSMUSGC Elf1      | -2.37474 | 0.000546 | 0.016959 |
| ENSMUSGC Sox6      | -2.37077 | 0.000629 | 0.018992 |
| ENSMUSGC Zfyve16   | -2.37019 | 0.000213 | 0.008207 |
| ENSMUSGC Zbtb16    | -2.36574 | 0.000205 | 0.007986 |
| ENSMUSGC Nts       | -2.36526 | 2.40E-06 | 0.000194 |
| ENSMUSGC Pltp      | -2.36516 | 4.33E-07 | 4.66E-05 |
| ENSMUSGC Cyp27a1   | -2.36167 | 0.001578 | 0.038088 |
| ENSMUSGC Hist2h2be | -2.36045 | 0.000395 | 0.013296 |
| ENSMUSGC H2-K1     | -2.35721 | 9.39E-05 | 0.004199 |
| ENSMUSGC Nwd1      | -2.35667 | 7.63E-05 | 0.003529 |
| ENSMUSGC Hspb1     | -2.35593 | 0.00058  | 0.017748 |
| ENSMUSGC Map2      | -2.35508 | 1.20E-06 | 0.000106 |
| ENSMUSGC Pla2g4a   | -2.35463 | 0.000221 | 0.008429 |
| ENSMUSGC Sec14l2   | -2.35421 | 2.42E-06 | 0.000195 |
| ENSMUSGC AW047730  | -2.35137 | 1.39E-05 | 0.000865 |
| ENSMUSGC Triobp    | -2.346   | 0.000268 | 0.009763 |
| ENSMUSGC Sox1ot    | -2.3429  | 0.00081  | 0.023358 |
| ENSMUSGC Slc6a20a  | -2.33085 | 0.001955 | 0.044424 |
| ENSMUSGC Afap1l2   | -2.32643 | 1.76E-05 | 0.001056 |
| ENSMUSGC Ntsr2     | -2.32612 | 1.96E-08 | 3.39E-06 |
| ENSMUSGC Gjb1      | -2.31919 | 4.47E-06 | 0.000332 |
| ENSMUSGC Cav1      | -2.31872 | 5.84E-05 | 0.002866 |
| ENSMUSGC Slc12a4   | -2.31496 | 6.90E-05 | 0.003252 |
| ENSMUSGC Mmp14     | -2.3147  | 4.54E-05 | 0.00231  |
| ENSMUSGC Reep3     | -2.30012 | 2.52E-05 | 0.001427 |
| ENSMUSGC Islr      | -2.29703 | 0.002234 | 0.048968 |
| ENSMUSGC Ldlrap1   | -2.29669 | 0.000661 | 0.019848 |
| ENSMUSGC Stxbp3    | -2.28975 | 4.51E-07 | 4.83E-05 |
| ENSMUSGC Prox1     | -2.28885 | 0.000207 | 0.007995 |
| ENSMUSGC Nfe2l3    | -2.28869 | 0.001493 | 0.036476 |
| ENSMUSGC Neu4      | -2.28689 | 3.55E-05 | 0.0019   |
| ENSMUSGC Itgb8     | -2.28674 | 2.10E-07 | 2.57E-05 |
| ENSMUSGC Enpp2     | -2.28566 | 8.61E-05 | 0.003905 |
| ENSMUSGC Rin2      | -2.27789 | 5.74E-07 | 5.78E-05 |
| ENSMUSGC Dhrs4     | -2.2766  | 3.28E-05 | 0.001791 |
| ENSMUSGC Ltbr      | -2.27458 | 0.000258 | 0.009519 |
| ENSMUSGC Prrg1     | -2.27456 | 1.06E-05 | 0.000679 |
| ENSMUSGC Stxbp3-ps | -2.27385 | 9.48E-05 | 0.004218 |
| ENSMUSGC mt-Nd5    | -2.27354 | 2.96E-06 | 0.000232 |
| ENSMUSGC Jam2      | -2.27305 | 3.46E-07 | 3.90E-05 |

|                   |          |          |          |
|-------------------|----------|----------|----------|
| ENSMUSG( Notch2   | -2.27292 | 0.000918 | 0.025559 |
| ENSMUSG( Gm28439  | -2.27279 | 4.27E-06 | 0.00032  |
| ENSMUSG( Mcc      | -2.27152 | 3.36E-06 | 0.000255 |
| ENSMUSG( mt-Nd2   | -2.27047 | 6.88E-06 | 0.000476 |
| ENSMUSG( Rasl11a  | -2.26787 | 0.000903 | 0.025287 |
| ENSMUSG( Zfp36    | -2.26008 | 0.001391 | 0.034848 |
| ENSMUSG( Plxnb3   | -2.25863 | 6.65E-05 | 0.003171 |
| ENSMUSG( Trp53bp2 | -2.25772 | 7.74E-05 | 0.003564 |
| ENSMUSG( Pde1c    | -2.25735 | 0.000976 | 0.026843 |
| ENSMUSG( Glipr2   | -2.2557  | 0.001655 | 0.039337 |
| ENSMUSG( Nkain4   | -2.25209 | 1.28E-06 | 0.000112 |
| ENSMUSG( Prex1    | -2.25176 | 5.63E-08 | 8.34E-06 |
| ENSMUSG( Slc6a9   | -2.25166 | 8.42E-07 | 8.11E-05 |
| ENSMUSG( Ctso     | -2.24753 | 0.000414 | 0.013758 |
| ENSMUSG( Gstm7    | -2.24613 | 5.10E-08 | 7.81E-06 |
| ENSMUSG( Gm973    | -2.24445 | 1.51E-05 | 0.00092  |
| ENSMUSG( Mmd2     | -2.23672 | 8.92E-09 | 1.75E-06 |
| ENSMUSG( Cyp2j6   | -2.23501 | 0.000311 | 0.011042 |
| ENSMUSG( Ifit3    | -2.23423 | 1.32E-05 | 0.000827 |
| ENSMUSG( Tmc7     | -2.2339  | 0.000167 | 0.006773 |
| ENSMUSG( Icosl    | -2.23292 | 0.001086 | 0.029216 |
| ENSMUSG( Id1      | -2.22849 | 0.000349 | 0.012053 |
| ENSMUSG( Fbxo32   | -2.22405 | 0.001308 | 0.033253 |
| ENSMUSG( Mtrmr10  | -2.2217  | 2.84E-05 | 0.001581 |
| ENSMUSG( Ptpn13   | -2.22066 | 0.001037 | 0.028238 |
| ENSMUSG( Lpp      | -2.22043 | 0.001241 | 0.031994 |
| ENSMUSG( Gbp7     | -2.21988 | 0.002207 | 0.048667 |
| ENSMUSG( Phldb1   | -2.21795 | 2.48E-07 | 2.94E-05 |
| ENSMUSG( Gpm6b    | -2.21701 | 2.51E-08 | 4.16E-06 |
| ENSMUSG( Gm45767  | -2.21442 | 9.45E-05 | 0.004212 |
| ENSMUSG( Tsc22d4  | -2.21159 | 6.16E-08 | 8.92E-06 |
| ENSMUSG( Wls      | -2.21145 | 0.000402 | 0.013453 |
| ENSMUSG( mt-Nd4   | -2.21069 | 1.91E-05 | 0.001126 |
| ENSMUSG( mt-Nd1   | -2.20287 | 5.18E-05 | 0.002582 |
| ENSMUSG( Sspn     | -2.19549 | 0.000117 | 0.005046 |
| ENSMUSG( Rn7s1    | -2.19384 | 0.000225 | 0.00854  |
| ENSMUSG( Hip1     | -2.18253 | 1.80E-05 | 0.001077 |
| ENSMUSG( Prex2    | -2.17503 | 2.44E-05 | 0.001389 |
| ENSMUSG( Gm9791   | -2.1749  | 0.001095 | 0.029389 |
| ENSMUSG( Pm20d1   | -2.16986 | 0.000323 | 0.011366 |
| ENSMUSG( Mbp      | -2.16879 | 1.58E-05 | 0.000961 |
| ENSMUSG( Unc93b1  | -2.16566 | 5.04E-05 | 0.00252  |
| ENSMUSG( Gm2a     | -2.1591  | 2.17E-08 | 3.71E-06 |
| ENSMUSG( Lmx1a    | -2.15875 | 9.71E-07 | 9.07E-05 |
| ENSMUSG( Mob3b    | -2.15837 | 3.36E-05 | 0.001823 |
| ENSMUSG( Gm2115   | -2.15632 | 7.57E-05 | 0.003505 |
| ENSMUSG( Bcan     | -2.1556  | 3.97E-07 | 4.31E-05 |

|                   |          |          |          |
|-------------------|----------|----------|----------|
| ENSMUSGC Cpq      | -2.1538  | 3.29E-06 | 0.000252 |
| ENSMUSGC Entpd2   | -2.15288 | 0.000254 | 0.009394 |
| ENSMUSGC Sugct    | -2.14569 | 3.71E-05 | 0.001973 |
| ENSMUSGC Gramd3   | -2.14376 | 6.44E-05 | 0.003096 |
| ENSMUSGC Serinc5  | -2.14148 | 1.87E-05 | 0.001108 |
| ENSMUSGC Frmd8    | -2.13891 | 1.00E-07 | 1.37E-05 |
| ENSMUSGC Gpr37    | -2.13599 | 0.000188 | 0.007448 |
| ENSMUSGC Inf2     | -2.13349 | 0.000499 | 0.015825 |
| ENSMUSGC Kansl1l  | -2.13326 | 0.000783 | 0.022773 |
| ENSMUSGC Myo9b    | -2.13095 | 9.66E-05 | 0.004278 |
| ENSMUSGC Lrig3    | -2.12932 | 0.001781 | 0.041304 |
| ENSMUSGC Rassf2   | -2.12331 | 1.01E-06 | 9.26E-05 |
| ENSMUSGC Ly6a     | -2.12213 | 0.001704 | 0.040136 |
| ENSMUSGC mt-Nd6   | -2.12064 | 4.20E-05 | 0.002168 |
| ENSMUSGC Oplah    | -2.11967 | 3.35E-05 | 0.001822 |
| ENSMUSGC Susd5    | -2.11802 | 0.000513 | 0.016127 |
| ENSMUSGC Tfp2b    | -2.11252 | 3.33E-06 | 0.000253 |
| ENSMUSGC Tjp1     | -2.1087  | 1.92E-05 | 0.001126 |
| ENSMUSGC Tac1     | -2.09784 | 1.31E-05 | 0.000825 |
| ENSMUSGC Mdc1     | -2.09621 | 0.000445 | 0.014571 |
| ENSMUSGC Lactb2   | -2.09599 | 2.91E-05 | 0.001606 |
| ENSMUSGC Rorb     | -2.09415 | 5.37E-07 | 5.50E-05 |
| ENSMUSGC Abcd2    | -2.09158 | 2.17E-06 | 0.000177 |
| ENSMUSGC Rnf135   | -2.08324 | 0.001111 | 0.0296   |
| ENSMUSGC Rhoc     | -2.07828 | 0.001783 | 0.041304 |
| ENSMUSGC Anxa4    | -2.07754 | 0.000362 | 0.012386 |
| ENSMUSGC Fryl     | -2.0767  | 0.000319 | 0.011261 |
| ENSMUSGC Chil1    | -2.07627 | 1.77E-05 | 0.001061 |
| ENSMUSGC Creb5    | -2.07234 | 0.001409 | 0.035132 |
| ENSMUSGC mt-Atp8  | -2.07109 | 0.000463 | 0.015007 |
| ENSMUSGC Trim59   | -2.06265 | 1.87E-05 | 0.001107 |
| ENSMUSGC Cnn2     | -2.05847 | 0.000221 | 0.008422 |
| ENSMUSGC Arhgdib  | -2.05061 | 0.00014  | 0.005886 |
| ENSMUSGC Fermt2   | -2.04229 | 3.53E-07 | 3.96E-05 |
| ENSMUSGC mt-Cytb  | -2.04052 | 0.000154 | 0.006372 |
| ENSMUSGC Gpt2     | -2.03673 | 1.66E-06 | 0.000142 |
| ENSMUSGC Csnk1g1  | -2.03017 | 0.001371 | 0.034505 |
| ENSMUSGC Acaa2    | -2.02819 | 9.37E-06 | 0.00061  |
| ENSMUSGC D16Ert47 | -2.02775 | 0.000436 | 0.014334 |
| ENSMUSGC Ttyh1    | -2.02475 | 5.55E-08 | 8.26E-06 |
| ENSMUSGC Slc7a2   | -2.02414 | 0.000461 | 0.014967 |
| ENSMUSGC St18     | -2.02244 | 0.000127 | 0.005397 |
| ENSMUSGC Irak2    | -2.01924 | 3.07E-06 | 0.00024  |
| ENSMUSGC Sh3bgr   | -2.01834 | 0.000425 | 0.014074 |
| ENSMUSGC Fam53b   | -2.01425 | 3.39E-05 | 0.001838 |
| ENSMUSGC Smtnl2   | -2.01268 | 0.000225 | 0.00854  |
| ENSMUSGC Gm10925  | -2.01209 | 0.000155 | 0.006389 |

|                      |          |          |          |
|----------------------|----------|----------|----------|
| ENSMUSG(C Ddo        | -2.00459 | 8.27E-06 | 0.000549 |
| ENSMUSG(C Gm35040    | -2.00175 | 0.001707 | 0.040136 |
| ENSMUSG(C Gpr146     | -2.0002  | 0.000121 | 0.005173 |
| ENSMUSG(C Cdr1       | -1.99861 | 1.10E-06 | 9.90E-05 |
| ENSMUSG(C Rhpn2      | -1.99463 | 1.01E-05 | 0.000652 |
| ENSMUSG(C Ino80d     | -1.98951 | 0.00071  | 0.021042 |
| ENSMUSG(C Myo10      | -1.98932 | 5.36E-05 | 0.002652 |
| ENSMUSG(C Ppp1r18    | -1.98597 | 0.000668 | 0.020027 |
| ENSMUSG(C Aldh6a1    | -1.98148 | 1.08E-06 | 9.73E-05 |
| ENSMUSG(C Paqr8      | -1.98008 | 2.72E-05 | 0.001528 |
| ENSMUSG(C Cmtm6      | -1.97941 | 9.53E-05 | 0.004228 |
| ENSMUSG(C Appl2      | -1.97883 | 9.83E-07 | 9.11E-05 |
| ENSMUSG(C Hsd3b7     | -1.97679 | 0.000279 | 0.010103 |
| ENSMUSG(C Zeb1       | -1.97504 | 7.97E-05 | 0.003655 |
| ENSMUSG(C Bcas1      | -1.96609 | 0.00048  | 0.015381 |
| ENSMUSG(C Trps1      | -1.96434 | 0.000372 | 0.012684 |
| ENSMUSG(C Hes5       | -1.96214 | 4.32E-05 | 0.002212 |
| ENSMUSG(C Ss18       | -1.96149 | 2.67E-05 | 0.001507 |
| ENSMUSG(C Serhl      | -1.9595  | 0.000554 | 0.017138 |
| ENSMUSG(C Stk17b     | -1.95939 | 0.000491 | 0.015612 |
| ENSMUSG(C Mobp       | -1.95913 | 3.89E-05 | 0.002034 |
| ENSMUSG(C Emilin2    | -1.9537  | 0.001951 | 0.044396 |
| ENSMUSG(C Gna13      | -1.94586 | 3.73E-05 | 0.001973 |
| ENSMUSG(C Gpam       | -1.94438 | 1.09E-05 | 0.000698 |
| ENSMUSG(C Nfib       | -1.93753 | 0.000155 | 0.006395 |
| ENSMUSG(C Aldoc      | -1.93134 | 2.05E-07 | 2.53E-05 |
| ENSMUSG(C Apc        | -1.93086 | 2.00E-06 | 0.000165 |
| ENSMUSG(C Sft2d2     | -1.93048 | 9.18E-05 | 0.004119 |
| ENSMUSG(C Slc12a2    | -1.92772 | 0.000114 | 0.004927 |
| ENSMUSG(C Dpyd       | -1.92738 | 9.13E-05 | 0.004105 |
| ENSMUSG(C Exoc3l4    | -1.92681 | 0.000161 | 0.006542 |
| ENSMUSG(C Arhgap17   | -1.92566 | 0.000328 | 0.011479 |
| ENSMUSG(C Il1rap     | -1.92006 | 0.001054 | 0.028499 |
| ENSMUSG(C Tmem229a   | -1.91544 | 1.52E-06 | 0.000131 |
| ENSMUSG(C Ifi27      | -1.91461 | 1.95E-06 | 0.000162 |
| ENSMUSG(C Snhg14     | -1.91168 | 0.001148 | 0.030445 |
| ENSMUSG(C Tnpo1      | -1.90835 | 3.26E-06 | 0.00025  |
| ENSMUSG(C Fads2      | -1.9073  | 4.84E-05 | 0.002426 |
| ENSMUSG(C Dbi        | -1.90362 | 1.14E-05 | 0.000723 |
| ENSMUSG(C Tspan14    | -1.90263 | 0.000346 | 0.011973 |
| ENSMUSG(C Psat1      | -1.90097 | 2.12E-07 | 2.57E-05 |
| ENSMUSG(C Myo1b      | -1.89921 | 0.001114 | 0.029647 |
| ENSMUSG(C Acad11     | -1.89714 | 5.28E-05 | 0.002625 |
| ENSMUSG(C St6galnac3 | -1.89434 | 0.001687 | 0.039884 |
| ENSMUSG(C Prelp      | -1.88776 | 7.41E-05 | 0.003455 |
| ENSMUSG(C Fgfr2      | -1.88737 | 0.000263 | 0.009642 |
| ENSMUSG(C Serpine2   | -1.88612 | 1.30E-05 | 0.000817 |

|                    |          |          |          |
|--------------------|----------|----------|----------|
| ENSMUSGC Slc25a13  | -1.88443 | 0.000329 | 0.011479 |
| ENSMUSGC Npas3     | -1.88434 | 3.71E-05 | 0.001973 |
| ENSMUSGC Skap2     | -1.88236 | 8.27E-06 | 0.000549 |
| ENSMUSGC Itgav     | -1.88166 | 0.001089 | 0.029273 |
| ENSMUSGC Lpcat3    | -1.88086 | 0.000719 | 0.021228 |
| ENSMUSGC Gpld1     | -1.87788 | 0.00029  | 0.010429 |
| ENSMUSGC Abtb2     | -1.87612 | 0.000104 | 0.004571 |
| ENSMUSGC Fads1     | -1.87557 | 2.90E-05 | 0.001606 |
| ENSMUSGC Slc13a3   | -1.87271 | 0.000473 | 0.015245 |
| ENSMUSGC Mvp       | -1.87078 | 3.72E-05 | 0.001973 |
| ENSMUSGC Scd2      | -1.8698  | 7.91E-05 | 0.003633 |
| ENSMUSGC Gm28437   | -1.86905 | 0.00057  | 0.017488 |
| ENSMUSGC Spg11     | -1.86694 | 0.000143 | 0.00597  |
| ENSMUSGC Fam163a   | -1.86693 | 0.001156 | 0.030514 |
| ENSMUSGC mt-Co3    | -1.86622 | 0.000702 | 0.020855 |
| ENSMUSGC Hmox1     | -1.86558 | 0.000389 | 0.013141 |
| ENSMUSGC Fam181b   | -1.86    | 7.65E-06 | 0.000517 |
| ENSMUSGC Spsb1     | -1.85791 | 0.000188 | 0.007448 |
| ENSMUSGC Mboat2    | -1.84462 | 5.73E-06 | 0.00041  |
| ENSMUSGC Fbxo30    | -1.83727 | 0.000452 | 0.014703 |
| ENSMUSGC Zeb2      | -1.83636 | 0.000842 | 0.024137 |
| ENSMUSGC Gm28661   | -1.82733 | 0.001278 | 0.032668 |
| ENSMUSGC Pacsin3   | -1.8247  | 3.80E-05 | 0.002004 |
| ENSMUSGC Elovl2    | -1.82437 | 0.001268 | 0.032557 |
| ENSMUSGC Tanc1     | -1.81822 | 6.14E-05 | 0.002992 |
| ENSMUSGC Necap2    | -1.81779 | 1.60E-05 | 0.00097  |
| ENSMUSGC Arap2     | -1.7968  | 0.000604 | 0.018353 |
| ENSMUSGC Tgfa      | -1.79617 | 3.89E-05 | 0.002033 |
| ENSMUSGC mt-Co2    | -1.78964 | 0.001394 | 0.034878 |
| ENSMUSGC 4930402H2 | -1.78776 | 1.55E-05 | 0.000942 |
| ENSMUSGC Plekhh1   | -1.7872  | 0.000178 | 0.007159 |
| ENSMUSGC Phka1     | -1.7845  | 0.000156 | 0.006396 |
| ENSMUSGC Lrrc1     | -1.783   | 0.000631 | 0.019035 |
| ENSMUSGC 2-Sep     | -1.78107 | 2.60E-06 | 0.000206 |
| ENSMUSGC Hr        | -1.77898 | 0.000724 | 0.021311 |
| ENSMUSGC Fmo5      | -1.77791 | 0.001833 | 0.042248 |
| ENSMUSGC Crhbp     | -1.77701 | 0.000533 | 0.016614 |
| ENSMUSGC Trp53bp1  | -1.77644 | 0.000213 | 0.008195 |
| ENSMUSGC mt-Co1    | -1.77558 | 0.001194 | 0.031172 |
| ENSMUSGC Id2       | -1.77442 | 4.52E-06 | 0.000333 |
| ENSMUSGC Syne1     | -1.76518 | 1.95E-05 | 0.001145 |
| ENSMUSGC Llgl1     | -1.7627  | 8.06E-06 | 0.000541 |
| ENSMUSGC Cxcl14    | -1.76069 | 5.91E-05 | 0.002897 |
| ENSMUSGC Sqor      | -1.76011 | 0.000184 | 0.007335 |
| ENSMUSGC Prdx6     | -1.75966 | 7.56E-06 | 0.000514 |
| ENSMUSGC Cdk19     | -1.75142 | 0.001208 | 0.031487 |
| ENSMUSGC Rest      | -1.74844 | 0.001403 | 0.035032 |

|          |           |          |          |          |
|----------|-----------|----------|----------|----------|
| ENSMUSGC | 4-Sep     | -1.74122 | 9.32E-07 | 8.75E-05 |
| ENSMUSGC | Nfat5     | -1.73337 | 0.000469 | 0.015146 |
| ENSMUSGC | Prkcq     | -1.72801 | 0.000295 | 0.010568 |
| ENSMUSGC | Rida      | -1.72441 | 4.58E-05 | 0.002323 |
| ENSMUSGC | Cald1     | -1.71777 | 0.000709 | 0.021015 |
| ENSMUSGC | Cavin1    | -1.71471 | 0.001522 | 0.036916 |
| ENSMUSGC | Mettl7a1  | -1.71459 | 0.000396 | 0.013303 |
| ENSMUSGC | Abhd5     | -1.7108  | 0.000221 | 0.008422 |
| ENSMUSGC | Cep97     | -1.70279 | 0.000499 | 0.015828 |
| ENSMUSGC | Peli2     | -1.69452 | 0.000331 | 0.011534 |
| ENSMUSGC | Il18      | -1.69404 | 0.00019  | 0.007515 |
| ENSMUSGC | Spata13   | -1.69008 | 0.001881 | 0.04321  |
| ENSMUSGC | 2810468NC | -1.67917 | 7.35E-05 | 0.003438 |
| ENSMUSGC | Nek9      | -1.67092 | 0.000195 | 0.007679 |
| ENSMUSGC | Fam234a   | -1.66335 | 0.000267 | 0.009757 |
| ENSMUSGC | Fut10     | -1.66047 | 0.002088 | 0.046501 |
| ENSMUSGC | Usp53     | -1.65664 | 0.00027  | 0.009827 |
| ENSMUSGC | Fah       | -1.65066 | 2.91E-05 | 0.001606 |
| ENSMUSGC | Smpd3a    | -1.64953 | 0.001873 | 0.043065 |
| ENSMUSGC | Tns1      | -1.64832 | 8.62E-05 | 0.003905 |
| ENSMUSGC | Msn       | -1.64691 | 0.001152 | 0.030514 |
| ENSMUSGC | Carmil1   | -1.64587 | 0.000147 | 0.006107 |
| ENSMUSGC | Dmd       | -1.64397 | 0.000272 | 0.009882 |
| ENSMUSGC | Slc27a1   | -1.6302  | 0.000186 | 0.007397 |
| ENSMUSGC | Tpmt      | -1.62933 | 0.000934 | 0.025896 |
| ENSMUSGC | Hacl1     | -1.62728 | 0.001697 | 0.040042 |
| ENSMUSGC | Ppfibp2   | -1.62059 | 0.001824 | 0.042138 |
| ENSMUSGC | Yes1      | -1.61638 | 0.001206 | 0.031445 |
| ENSMUSGC | Snx22     | -1.61319 | 0.000552 | 0.017117 |
| ENSMUSGC | Klf3      | -1.60857 | 0.00051  | 0.016081 |
| ENSMUSGC | Vamp3     | -1.60125 | 0.000377 | 0.012833 |
| ENSMUSGC | Phlpp1    | -1.5998  | 8.61E-05 | 0.003905 |
| ENSMUSGC | Kdm3b     | -1.59643 | 0.00048  | 0.015381 |
| ENSMUSGC | Add3      | -1.59226 | 2.18E-05 | 0.001253 |
| ENSMUSGC | Neat1     | -1.59022 | 0.000939 | 0.026024 |
| ENSMUSGC | Nbeal1    | -1.58895 | 0.00066  | 0.019848 |
| ENSMUSGC | Pir       | -1.58627 | 0.001044 | 0.028328 |
| ENSMUSGC | Maob      | -1.58562 | 3.84E-05 | 0.002015 |
| ENSMUSGC | Fkbp9     | -1.58474 | 0.002224 | 0.048847 |
| ENSMUSGC | Plekhd1   | -1.58036 | 0.000883 | 0.024922 |
| ENSMUSGC | Klf15     | -1.5782  | 6.97E-05 | 0.003277 |
| ENSMUSGC | Sbf2      | -1.57742 | 0.000199 | 0.007816 |
| ENSMUSGC | Etv5      | -1.5625  | 0.000232 | 0.008759 |
| ENSMUSGC | Acsl6     | -1.56173 | 0.000206 | 0.007986 |
| ENSMUSGC | Eci1      | -1.55667 | 0.000433 | 0.014284 |
| ENSMUSGC | Ccnd3     | -1.55472 | 0.000544 | 0.016929 |
| ENSMUSGC | Kctd5     | -1.53958 | 0.00014  | 0.005886 |

|                     |          |          |          |
|---------------------|----------|----------|----------|
| ENSMUSGC Ctnnd1     | -1.53906 | 0.000547 | 0.016987 |
| ENSMUSGC Cat        | -1.53286 | 4.80E-05 | 0.002419 |
| ENSMUSGC Ndrgr1     | -1.53231 | 2.52E-05 | 0.001427 |
| ENSMUSGC Kmt2c      | -1.52988 | 0.002004 | 0.045071 |
| ENSMUSGC Ankhd1     | -1.52629 | 0.000396 | 0.013303 |
| ENSMUSGC Plcd4      | -1.52499 | 0.002049 | 0.045726 |
| ENSMUSGC Lims1      | -1.51847 | 0.000877 | 0.024851 |
| ENSMUSGC Nup160     | -1.51511 | 0.001981 | 0.0448   |
| ENSMUSGC Trim36     | -1.50997 | 0.000762 | 0.022215 |
| ENSMUSGC Hacd2      | -1.50793 | 0.000787 | 0.022821 |
| ENSMUSGC Asrgl1     | -1.50534 | 0.000257 | 0.009505 |
| ENSMUSGC Ccnd1      | -1.49758 | 0.001161 | 0.03058  |
| ENSMUSGC Wnk1       | -1.49475 | 0.00035  | 0.012068 |
| ENSMUSGC Thrsp      | -1.48916 | 0.001518 | 0.036916 |
| ENSMUSGC Nr3c2      | -1.48847 | 0.001482 | 0.03633  |
| ENSMUSGC Ephx2      | -1.48775 | 0.001007 | 0.027552 |
| ENSMUSGC Dnm2       | -1.48546 | 9.07E-05 | 0.004094 |
| ENSMUSGC Esr1       | -1.48367 | 0.001186 | 0.031059 |
| ENSMUSGC Zcchc24    | -1.48109 | 0.000205 | 0.007986 |
| ENSMUSGC Wasf2      | -1.47372 | 0.002166 | 0.047964 |
| ENSMUSGC Sec14l1    | -1.46735 | 0.000424 | 0.014053 |
| ENSMUSGC Birc6      | -1.46246 | 0.000287 | 0.010347 |
| ENSMUSGC Pcca       | -1.46141 | 0.00137  | 0.034505 |
| ENSMUSGC Golgb1     | -1.45854 | 0.002242 | 0.049108 |
| ENSMUSGC Tcf12      | -1.45703 | 0.000562 | 0.017302 |
| ENSMUSGC Mob1a      | -1.44404 | 0.002265 | 0.049444 |
| ENSMUSGC Lap3       | -1.43988 | 0.000239 | 0.008963 |
| ENSMUSGC B2m        | -1.43826 | 0.000472 | 0.015228 |
| ENSMUSGC Nufip2     | -1.435   | 0.000749 | 0.021952 |
| ENSMUSGC Ankrd52    | -1.42635 | 0.001693 | 0.039976 |
| ENSMUSGC Mcur1      | -1.42559 | 0.000979 | 0.02689  |
| ENSMUSGC Smg1       | -1.42432 | 0.001334 | 0.033815 |
| ENSMUSGC Abl1       | -1.42176 | 0.001953 | 0.044418 |
| ENSMUSGC Igfbp4     | -1.42035 | 0.001658 | 0.039368 |
| ENSMUSGC Gabpa      | -1.41672 | 0.00222  | 0.048804 |
| ENSMUSGC Crot       | -1.41392 | 0.000483 | 0.015433 |
| ENSMUSGC Otud7b     | -1.41365 | 0.000326 | 0.011433 |
| ENSMUSGC Ivd        | -1.41287 | 0.000662 | 0.019853 |
| ENSMUSGC Kihl4      | -1.41254 | 0.001631 | 0.039082 |
| ENSMUSGC Tcf4       | -1.41207 | 0.000619 | 0.018714 |
| ENSMUSGC Htt        | -1.41166 | 0.000789 | 0.02286  |
| ENSMUSGC Dbndd2     | -1.41071 | 0.000554 | 0.017138 |
| ENSMUSGC Luzp2      | -1.40829 | 0.00036  | 0.012332 |
| ENSMUSGC Hexb       | -1.40389 | 0.001163 | 0.030604 |
| ENSMUSGC C130021I2I | -1.40012 | 0.001274 | 0.0326   |
| ENSMUSGC Cplx2      | -1.39123 | 0.000241 | 0.008976 |
| ENSMUSGC Pex5l      | -1.39055 | 0.000724 | 0.021311 |



|                   |          |          |          |
|-------------------|----------|----------|----------|
| ENSMUSG( Ptch1    | -1.38995 | 0.001155 | 0.030514 |
| ENSMUSG( Zyx      | -1.38553 | 0.001284 | 0.032721 |
| ENSMUSG( Pnpla2   | -1.38542 | 0.000476 | 0.015301 |
| ENSMUSG( Hipk2    | -1.38316 | 0.000507 | 0.016029 |
| ENSMUSG( Vwa8     | -1.37813 | 0.001626 | 0.039022 |
| ENSMUSG( Kmt2d    | -1.3754  | 0.000463 | 0.015    |
| ENSMUSG( Tmcc3    | -1.37391 | 0.000516 | 0.016184 |
| ENSMUSG( Pcx      | -1.37292 | 0.000871 | 0.024738 |
| ENSMUSG( Agl      | -1.36713 | 0.001093 | 0.029367 |
| ENSMUSG( Aldh4a1  | -1.35059 | 0.001216 | 0.031617 |
| ENSMUSG( Gm13910  | -1.33801 | 0.000785 | 0.0228   |
| ENSMUSG( Nacc2    | -1.3339  | 0.000433 | 0.014284 |
| ENSMUSG( Chm      | -1.33127 | 0.001479 | 0.036288 |
| ENSMUSG( Znfx1    | -1.3277  | 0.001587 | 0.038198 |
| ENSMUSG( Dip2a    | -1.32055 | 0.002265 | 0.049444 |
| ENSMUSG( Hsd17b4  | -1.31816 | 0.00075  | 0.021952 |
| ENSMUSG( Cpped1   | -1.31036 | 0.000907 | 0.025313 |
| ENSMUSG( Hadha    | -1.30279 | 0.000683 | 0.0204   |
| ENSMUSG( Ppp1r16b | -1.29506 | 0.000569 | 0.017482 |
| ENSMUSG( Ipo7     | -1.29299 | 0.001407 | 0.035106 |
| ENSMUSG( Limch1   | -1.27815 | 0.001054 | 0.028499 |
| ENSMUSG( Pik3r1   | -1.26723 | 0.001758 | 0.040839 |
| ENSMUSG( Rora     | -1.26328 | 0.000853 | 0.024333 |
| ENSMUSG( Pnn      | -1.25372 | 0.00158  | 0.038125 |
| ENSMUSG( Dazap2   | -1.24899 | 0.001189 | 0.0311   |
| ENSMUSG( Nacad    | -1.24881 | 0.000886 | 0.024922 |
| ENSMUSG( Anxa5    | -1.22807 | 0.000561 | 0.017297 |
| ENSMUSG( Ak3      | -1.21985 | 0.001982 | 0.0448   |
| ENSMUSG( Washc2   | -1.21324 | 0.001108 | 0.029563 |
| ENSMUSG( Hcfc1    | -1.21195 | 0.001214 | 0.031593 |
| ENSMUSG( Scp2     | -1.20475 | 0.001713 | 0.040146 |
| ENSMUSG( Tmem47   | -1.19935 | 0.001281 | 0.0327   |
| ENSMUSG( Nr3c1    | -1.19452 | 0.001672 | 0.039571 |
| ENSMUSG( Capn2    | -1.1902  | 0.001499 | 0.036598 |
| ENSMUSG( Adk      | -1.18818 | 0.001796 | 0.041551 |
| ENSMUSG( Eps15    | -1.18777 | 0.001522 | 0.036916 |
| ENSMUSG( Hook3    | -1.18322 | 0.001919 | 0.043773 |
| ENSMUSG( Dtna     | -1.18206 | 0.002021 | 0.045258 |
| ENSMUSG( Jup      | -1.18194 | 0.001508 | 0.036777 |
| ENSMUSG( Sirt2    | -1.14947 | 0.001893 | 0.043398 |
| ENSMUSG( Fnbp1    | -1.14011 | 0.001987 | 0.044849 |

# Supplementary Table 2. Summary of statistical analyses

| Figure | Sample size (n)                                                                                                         | Statistical test                                                                                                                                                                      | P values                                                                                                                                                                                                                                                                                                                  |
|--------|-------------------------------------------------------------------------------------------------------------------------|---------------------------------------------------------------------------------------------------------------------------------------------------------------------------------------|---------------------------------------------------------------------------------------------------------------------------------------------------------------------------------------------------------------------------------------------------------------------------------------------------------------------------|
| 1i     | Mice: 3<br>Brain slices: 20                                                                                             | Two-tailed unpaired t-test                                                                                                                                                            | $t=5.056$ , $df=38$<br>$P<0.0001$                                                                                                                                                                                                                                                                                         |
| 2e     | Warming: 14 mice<br>Cooling: 14 mice                                                                                    | Two-tailed paired t test                                                                                                                                                              | $t=3.398$ , $df=13$ , $P=0.0048$                                                                                                                                                                                                                                                                                          |
| 2h     | GCaMP6: 10 mice<br>21°C: 30 trials<br>16°C: 34 trials<br>10°C: 32 trials<br>4°C: 33 trials                              | Brown-Forsythe and Welch ANOVA tests<br>Don't correct for multiple comparisons test                                                                                                   | $F^*$ ( $DFn$ , $DFd$ ) 0.4612 (3.000, 122.7), $P=0.7099$<br>Multiple comparisons:<br>21°C vs. 16°C, $P=0.4077$<br>21°C vs. 10°C, $P=0.3677$<br>21°C vs. 4°C, $P=0.2756$<br>16°C vs. 10°C, $P=0.9587$<br>16°C vs. 4°C, $P=0.7521$<br>10°C vs. 4°C, $P=0.7838$                                                             |
| 2i     | GCaMP6: 10 mice<br>21°C: 30 trials<br>16°C: 34 trials<br>10°C: 32 trials<br>4°C: 33 trials                              | Brown-Forsythe and Welch ANOVA tests<br>Don't correct for multiple comparisons test                                                                                                   | $F^*$ ( $DFn$ , $DFd$ ) 17.70 (3.000, 116.8), $P<0.0001$<br>Multiple comparisons:<br>21°C vs. 16°C, $P=0.2288$<br>21°C vs. 10°C, $P<0.0001$<br>21°C vs. 4°C, $P<0.0001$<br>16°C vs. 10°C, $P=0.0021$<br>16°C vs. 4°C, $P<0.0001$<br>10°C vs. 4°C, $P=0.0547$                                                              |
| 2k     | GCaMP6: 10 mice<br>35-20°C: 20 trials<br>32-17°C: 17 trials<br>25-10°C: 26 trials<br>29-14°C: 17 trials                 | Brown-Forsythe and Welch ANOVA tests<br>Don't correct for multiple comparisons test                                                                                                   | $F^*$ ( $DFn$ , $DFd$ ) 0.1478 (3.000, 66.04), $P=0.9308$<br>Multiple comparisons:<br>35-20°C vs. 32-17°C, $P=0.6186$<br>35-20°C vs. 25-10°C, $P=0.4975$<br>35-20°C vs. 29-14°C, $P=0.9098$<br>32-17°C vs. 25-10°C, $P=0.8965$<br>32-17°C vs. 29-14°C, $P=0.7182$<br>25-10°C vs. 29-14°C, $P=0.6058$                      |
| 2l     | GCaMP6: 10 mice<br>35-20°C: 20 trials<br>32-17°C: 17 trials<br>25-10°C: 26 trials<br>29-14°C: 17 trials                 | Brown-Forsythe and Welch ANOVA tests<br>Don't correct for multiple comparisons test                                                                                                   | $F^*$ ( $DFn$ , $DFd$ ) 25.48 (3.000, 103.9), $P=0.1478$<br>Multiple comparisons:<br>35-20°C vs. 32-17°C, $P=0.0484$<br>35-20°C vs. 25-10°C, $P<0.0001$<br>35-20°C vs. 29-14°C, $P<0.0001$<br>32-17°C vs. 25-10°C, $P<0.0001$<br>32-17°C vs. 29-14°C, $P=0.0084$<br>25-10°C vs. 29-14°C, $P=0.0033$                       |
| 2n     | GCaMP6: 10 mice<br>0.1°C/s: 19 trials<br>0.2°C/s: 20 trials<br>0.4°C/s: 20 trials<br>0.7°C/s: 20 trials                 | Brown-Forsythe and Welch ANOVA tests<br>Don't correct for multiple comparisons test                                                                                                   | $F^*$ ( $DFn$ , $DFd$ ) 1.693 (3.000, 57.55), $P=0.1785$<br>Multiple comparisons:<br>0.1°C/s vs. 0.2°C/s, $P=0.0356$<br>0.1°C/s vs. 0.4°C/s, $P=0.0696$<br>0.1°C/s vs. 0.7°C/s, $P=0.0853$<br>0.2°C/s vs. 0.4°C/s, $P=0.7986$<br>0.2°C/s vs. 0.7°C/s, $P=0.4623$<br>0.4°C/s vs. 0.7°C/s, $P=0.6562$                       |
| 2o     | GCaMP6: 10 mice<br>0.1°C/s: 19 trials<br>0.2°C/s: 20 trials<br>0.4°C/s: 20 trials<br>0.7°C/s: 20 trials                 | Brown-Forsythe and Welch ANOVA tests<br>Don't correct for multiple comparisons test                                                                                                   | $F^*$ ( $DFn$ , $DFd$ ) 0.4130 (3.000, 71.93), $P=0.7442$<br>Multiple comparisons:<br>0.1°C/s vs. 0.2°C/s, $P=0.8573$<br>0.1°C/s vs. 0.4°C/s, $P=0.3253$<br>0.1°C/s vs. 0.7°C/s, $P=0.6648$<br>0.2°C/s vs. 0.4°C/s, $P=0.4287$<br>0.2°C/s vs. 0.7°C/s, $P=0.8226$<br>0.4°C/s vs. 0.7°C/s, $P=0.5019$                      |
| 2s     | Warming: 6 mice<br>Cooling: 6 mice                                                                                      | Two-tailed paired t test                                                                                                                                                              | $t=5.560$ , $df=5$ , $P=0.0026$                                                                                                                                                                                                                                                                                           |
| 2t     | Warming: 6 mice<br>Cooling: 6 mice                                                                                      | Two-tailed paired t test                                                                                                                                                              | $t=4.319$ , $df=5$ , $P=0.0076$                                                                                                                                                                                                                                                                                           |
| 3c     | GFP: 10 mice<br>DMH <sup>only</sup> projecting LPB<br>TeNT: 9 mice                                                      | RM two-way ANOVA<br>factor one: virus (GFP, DMH <sup>only</sup> projecting LPB<br>TeNT)<br>factor two: time<br>Uncorrected Fisher's LSD test                                          | Virus: $F(1, 17) = 2.664$ , $P=0.1210$<br>Time: $F(2.199, 37.38) = 5.516$ , $P=0.0065$<br>Interaction: $F(360, 6120) = 2.338$ , $P<0.0001$<br>Multiple comparisons:<br>GFP vs. DMH <sup>only</sup> projecting LPB TeNT:<br>95 min – 108 min, $P<0.0493$<br>117 min – 120 min, $P<0.0488$<br>123 min – 130 min, $P<0.0495$ |
|        | DMH <sup>only</sup> projecting LPB<br>TeNT: 9 mice<br>POA <sup>only</sup> projecting LPB<br>TeNT: 7mice                 | RM two-way ANOVA<br>factor one: virus ( DMH <sup>only</sup> projecting LPB TeNT,<br>POA <sup>only</sup> projecting LPB TeNT)<br>factor two: time<br>Uncorrected Fisher's LSD test     | Virus: $F(1, 14) = 0.09332$ , $P=0.7645$<br>Time: $F(2.201, 30.82) = 8.153$ , $P=0.0011$<br>Interaction: $F(360, 5040) = 0.7286$ , $P>0.9999$<br>Multiple comparisons:<br>POA <sup>only</sup> projecting LPB TeNT vs. DMH <sup>only</sup> projecting LPB TeNT:<br>$P>0.1575$                                              |
| 3d     | GFP: 10 mice<br>DMH <sup>only</sup> projecting LPB<br>TeNT: 8 mice<br>POA <sup>only</sup> projecting LPB<br>TeNT: 7mice | RM two-way ANOVA<br>factor one: virus (GFP, DMH <sup>only</sup> projecting LPB<br>TeNT, POA <sup>only</sup> projecting LPB TeNT)<br>factor two: time<br>Uncorrected Fisher's LSD test | Virus: $F(2, 22) = 2.757$ , $P=0.0854$<br>Time: $F(2.837, 62.40) = 14.82$ , $P<0.0001$<br>Interaction: $F(720, 7920) = 1.745$ , $P<0.0001$<br>Multiple comparisons:<br>GFP vs. DMH <sup>only</sup> projecting LPB TeNT:<br>15 min – 74 min, $P<0.0466$<br>220 min – 300 min, $P<0.0193$                                   |

(table continued on the next page)

# Supplementary Table 2. Summary of statistical analyses

| Figure | Sample size (n)                                                                                         | Statistical test                                                                                                                                                              | P values                                                                                                                                                                                                                                                                       |
|--------|---------------------------------------------------------------------------------------------------------|-------------------------------------------------------------------------------------------------------------------------------------------------------------------------------|--------------------------------------------------------------------------------------------------------------------------------------------------------------------------------------------------------------------------------------------------------------------------------|
| 3e     | GFP: 10 mice<br>DMH <sup>only</sup> projecting LPB<br>TeNT: 8 mice                                      | RM two-way ANOVA<br>factor one: virus (GFP, DMH <sup>only</sup> projecting LPB TeNT)<br>factor two: time<br>Uncorrected Fisher's LSD test                                     | Virus: $F(1, 16) = 10.66, P=0.0049$<br>Time: $F(360, 5760) = 28.00, P<0.0001$<br>Interaction: $F(360, 5760) = 5.486, P<0.0001$<br>Multiple comparisons:<br>GFP vs. DMH <sup>only</sup> projecting LPB TeNT:<br>19 min – 69 min, $P<0.0498$<br>159 min – 300 min, $P<0.0098$    |
|        | DMH <sup>only</sup> projecting LPB<br>TeNT: 8 mice<br>POA <sup>only</sup> projecting LPB<br>TeNT: 7mice | RM two-way ANOVA<br>factor one: virus (DMH <sup>only</sup> projecting LPB TeNT, POA <sup>only</sup> projecting LPB TeNT)<br>factor two: time<br>Uncorrected Fisher's LSD test | Virus: $F(1, 13) = 0.03077, P=0.8635$<br>Time: $F(360, 4680) = 36.17, P<0.0001$<br>Interaction: $F(360, 4680) = 0.4357, P>0.9999$<br>Multiple comparisons:<br>DMH <sup>only</sup> projecting LPB TeNT vs. POA <sup>only</sup> projecting LPB TeNT:<br>$P>0.1381$               |
| 3f     | GFP: 10 mice<br>DMH <sup>only</sup> projecting LPB<br>TeNT: 8 mice                                      | RM two-way ANOVA<br>factor one: virus (GFP, DMH <sup>only</sup> projecting LPB TeNT)<br>factor two: time<br>Uncorrected Fisher's LSD test                                     | Virus: $F(1, 16) = 8.921, P=0.0087$<br>Time: $F(360, 5760) = 32.63, P<0.0001$<br>Interaction: $F(360, 5760) = 5.171, P<0.0001$<br>Multiple comparisons:<br>GFP vs. DMH <sup>only</sup> projecting LPB TeNT: 57 min – 300 min,<br>$P<0.0088$                                    |
|        | DMH <sup>only</sup> projecting LPB<br>TeNT: 8 mice<br>POA <sup>only</sup> projecting LPB<br>TeNT: 7mice | RM two-way ANOVA<br>factor one: virus (DMH <sup>only</sup> projecting LPB TeNT, POA <sup>only</sup> projecting LPB TeNT)<br>factor two: time<br>Uncorrected Fisher's LSD test | Virus: $F(1, 13) = 2.382, P=0.1467$<br>Time: $F(360, 4680) = 47.96, P<0.0001$<br>Interaction: $F(360, 4680) = 1.279, P=0.0004$<br>Multiple comparisons:<br>DMH <sup>only</sup> projecting LPB TeNT vs. POA <sup>only</sup> projecting LPB TeNT:<br>16 min – 62 min, $P<0.0483$ |
| 3h     | GFP: 10<br>DMH <sup>LPB</sup> blocking: 10                                                              | RM two-way ANOVA<br>factor one: virus (GFP, DMH <sup>LPB</sup> blocking)<br>factor two: time<br>Uncorrected Fisher's LSD test                                                 | Virus: $F(1, 18) = 29.88, P<0.0001$<br>Time: $F(4.518, 81.32) = 15.14, P<0.0001$<br>Interaction: $F(360, 4680) = 6.670, P<0.0001$<br>Multiple comparisons: 37 min – 300 min, $P<0.0075$                                                                                        |
|        | POA <sup>LPB</sup> blocking: 9<br>Co-blocking: 6                                                        | RM two-way ANOVA<br>factor one: virus (POA <sup>LPB</sup> blocking, Co-blocking)<br>factor two: time<br>Uncorrected Fisher's LSD test                                         | Virus: $F(1, 13) = 3.875, P=0.0707$<br>Time: $F(2.126, 27.64) = 24.71, P<0.0001$<br>Interaction: $F(360, 4680) = 1.089, P=0.1264$<br>Multiple comparisons: 75 min – 149 min, $P<0.0487$                                                                                        |
|        | POA <sup>LPB</sup> blocking: 9<br>DMH <sup>LPB</sup> blocking: 10                                       | RM two-way ANOVA<br>factor one: virus (POA <sup>LPB</sup> blocking, DMH <sup>LPB</sup> blocking)<br>factor two: time<br>Uncorrected Fisher's LSD test                         | Virus: $F(1, 17) = 0.9149, P=0.3522$<br>Time: $F(2.349, 39.93) = 27.73, P<0.0001$<br>Interaction: $F(360, 6120) = 1.761, P<0.0001$<br>Multiple comparisons: 35 min – 54 min, $P<0.0453$                                                                                        |
| 3i     | GFP: 10<br>DMH <sup>LPB</sup> blocking: 10                                                              | RM two-way ANOVA<br>factor one: virus (GFP, DMH <sup>LPB</sup> blocking)<br>factor two: time<br>Uncorrected Fisher's LSD test                                                 | Virus: $F(1, 18) = 22.52, P=0.0002$<br>Time: $F(3.450, 62.11) = 37.24, P<0.0001$<br>Interaction: $F(360, 6480) = 11.66, P<0.0001$<br>Multiple comparisons: 7 min – 300 min, $P<0.0095$                                                                                         |
|        | POA <sup>LPB</sup> blocking: 9<br>Co-blocking: 6                                                        | RM two-way ANOVA<br>factor one: virus (POA <sup>LPB</sup> blocking, Co-blocking)<br>factor two: time<br>Uncorrected Fisher's LSD test                                         | Virus: $F(1, 13) = 4.561, P=0.0523$<br>Time: $F(2.316, 30.10) = 53.89, P<0.0001$<br>Interaction: $F(360, 4680) = 6.098, P<0.0001$<br>Multiple comparisons: 116 min – 300 min, $P<0.0495$                                                                                       |
|        | POA <sup>LPB</sup> blocking: 9<br>DMH <sup>LPB</sup> blocking: 10                                       | RM two-way ANOVA<br>factor one: virus (POA <sup>LPB</sup> blocking, DMH <sup>LPB</sup> blocking)<br>factor two: time<br>Uncorrected Fisher's LSD test                         | Virus: $F(1, 17) = 0.06235, P=0.8058$<br>Time: $F(2.683, 45.62) = 39.88, P<0.0001$<br>Interaction: $F(360, 6120) = 0.6782, P>0.9999$<br>Multiple comparisons: 19 min – 35 min, $P<0.0471$                                                                                      |
| 3j     | GFP: 10<br>DMH <sup>LPB</sup> blocking: 10                                                              | RM two-way ANOVA<br>factor one: virus (GFP, DMH <sup>LPB</sup> blocking)<br>factor two: time<br>Uncorrected Fisher's LSD test                                                 | Virus: $F(1, 18) = 34.35, P<0.0001$<br>Time: $F(2.993, 53.87) = 106.5, P<0.0001$<br>Interaction: $F(360, 6480) = 25.91, P<0.0001$<br>Multiple comparisons: 31 min – 300 min, $P<0.0008$                                                                                        |
|        | POA <sup>LPB</sup> blocking: 9<br>DMH <sup>LPB</sup> blocking: 10                                       | RM two-way ANOVA<br>factor one: virus (POA <sup>LPB</sup> blocking, DMH <sup>LPB</sup> blocking)<br>factor two: time<br>Uncorrected Fisher's LSD test                         | Virus: $F(1, 17) = 0.2659, P=0.6128$<br>Time: $F(2.421, 41.16) = 122.5, P<0.0001$<br>Interaction: $F(360, 6120) = 0.6928, P>0.9999$<br>Multiple comparisons: $P>0.2914$                                                                                                        |
|        | POA <sup>LPB</sup> blocking: 9<br>Co-blocking: 6                                                        | RM two-way ANOVA<br>factor one: virus (POA <sup>LPB</sup> blocking, Co-blocking)<br>factor two: time<br>Uncorrected Fisher's LSD test                                         | Virus: $F(1, 13) = 2.316, P=0.1520$<br>Time: $F(1.727, 22.45) = 137.5, P<0.0001$<br>Interaction: $F(154, 2002) = 3.619, P<0.0001$<br>Multiple comparisons: 61 min – 94 min, $P<0.0482$                                                                                         |
| 3k     | GFP: 10<br>DMH <sup>LPB</sup> blocking: 10                                                              | RM two-way ANOVA<br>factor one: virus (GFP, DMH <sup>LPB</sup> blocking)<br>factor two: time<br>Uncorrected Fisher's LSD test                                                 | Virus: $F(1, 18) = 93.14, P<0.0001$<br>Time: $F(2.270, 40.86) = 158.3, P<0.0001$<br>Interaction: $F(277, 4986) = 46.53, P<0.0001$<br>Multiple comparisons: 31 min – 217 min, $P<0.0009$                                                                                        |
|        | POA <sup>LPB</sup> blocking: 9<br>DMH <sup>LPB</sup> blocking: 10                                       | RM two-way ANOVA<br>factor one: virus (POA <sup>LPB</sup> blocking, DMH <sup>LPB</sup> blocking)<br>factor two: time<br>Uncorrected Fisher's LSD test                         | Virus: $F(1, 17) = 0.02254, P=0.8824$<br>Time: $F(277, 4709) = 192.6, P<0.0001$<br>Interaction: $F(277, 4709) = 1.468, P<0.0001$<br>Multiple comparisons: 22 min – 37 min, $P<0.0429$                                                                                          |
|        | POA <sup>LPB</sup> blocking: 9<br>Co-blocking: 6                                                        | RM two-way ANOVA<br>factor one: virus (POA <sup>LPB</sup> blocking, Co-blocking)<br>factor two: time<br>Uncorrected Fisher's LSD test                                         | Virus: $F(1, 13) = 5.089, P=0.0419$<br>Time: $F(1.814, 23.58) = 166.2, P<0.0001$<br>Interaction: $F(120, 1560) = 4.740, P<0.0001$<br>Multiple comparisons: 36 min – 59 min, $P<0.0417$                                                                                         |

(table continued on the next page)

# Supplementary Table 2. Summary of statistical analyses

| Figure | Sample size (n)                                                                                                                | Statistical test                                                                                                                                                                                   | P values                                                                                                                                                                                                                                                                                                                                                            |
|--------|--------------------------------------------------------------------------------------------------------------------------------|----------------------------------------------------------------------------------------------------------------------------------------------------------------------------------------------------|---------------------------------------------------------------------------------------------------------------------------------------------------------------------------------------------------------------------------------------------------------------------------------------------------------------------------------------------------------------------|
| 4c     | ChR2: 10 mice<br>GFP: 8 mice                                                                                                   | RM two-way ANOVA<br>factor one: virus (ChR2, GFP)<br>factor two: time<br>Bonferroni's multiple comparisons test                                                                                    | Virus: $F(1, 16) = 11.26, P=0.0040$<br>Time: $F(90, 1440) = 7.309, P<0.0001$<br>Interaction: $F(90, 1440) = 12.99, P<0.0001$<br>Multiple comparisons: 8 min – 40 min, $P<0.0001$                                                                                                                                                                                    |
| 4d     | ChR2: 10 mice<br>GFP: 8 mice                                                                                                   | RM two-way ANOVA<br>factor one: virus (ChR2, GFP)<br>factor two: time<br>Uncorrected Fisher's LSD test                                                                                             | Virus: $F(1, 16) = 30.92, P<0.0001$<br>Time: $F(90, 1440) = 4.328, P<0.0001$<br>Interaction: $F(90, 1440) = 1.737, P<0.0001$<br>multiple comparisons: Before-After: 0 min – 38 min, $P<0.0396$                                                                                                                                                                      |
| 4k     | Non-blocking: 10 mice<br>DMH <sup>Vglut2</sup> blocking: 5 mice<br>DMH <sup>Vgat</sup> blocking: 5 mice<br>POA blocked: 5 mice | RM two-way ANOVA<br>factor one: treatment (Non-blocking, DMH <sup>Vglut2</sup> blocking, DMH <sup>Vgat</sup> blocking, POA blocking)<br>factor two: time<br>Bonferroni's multiple comparisons test | Treatment: $F(3, 21) = 9.102, P=0.0005$<br>Time: $F(90, 1890) = 11.60, P<0.0001$<br>Interaction: $F(270, 1890) = 10.46, P<0.0001$<br>Multiple comparisons:<br>Non-blocking vs. DMH <sup>Vglut2</sup> blocking: 9 min – 45 min, $P<0.0001$<br>Non-blocking vs. DMH <sup>Vgat</sup> blocking: 7 min – 43 min, $P<0.0001$<br>Non-blocking vs. POA blocking: $P>0.4970$ |
| 4l     | Non-blocking: 10 mice<br>DMH <sup>Vglut2</sup> blocking: 5 mice<br>DMH <sup>Vgat</sup> blocking: 5 mice<br>GFP: 5 mice         | RM two-way ANOVA<br>factor one: treatment (Non-blocking, DMH <sup>Vglut2</sup> blocking, DMH <sup>Vgat</sup> blocking, GFP)<br>factor two: time<br>Bonferroni's multiple comparisons test          | Treatment: $F(3, 21) = 9.566, P=0.0003$<br>Time: $F(1, 21) = 13.59, P=0.0014$<br>Interaction: $F(3, 21) = 7.305, P=0.0015$<br>Multiple comparisons:<br>b.s. vs. 10 min – 30 min:<br>Non-blocking: $P=0.0005$<br>GFP: $P>0.9999$<br>DMH <sup>Vglut2</sup> blocking: $P=0.8948$<br>DMH <sup>Vgat</sup> blocking: $P>0.9999$                                           |
| 4m     | 5 mice each                                                                                                                    | RM two-way ANOVA<br>factor one: treatment (Non-blocking, DMH <sup>Vglut2</sup> blocking, DMH <sup>Vgat</sup> blocking, GFP)<br>factor two: time<br>Bonferroni's multiple comparisons test          | Treatment: $F(3, 16) = 23.36, P<0.0001$<br>Time: $F(9, 144) = 1.652, P=0.1060$<br>Interaction: $F(27, 144) = 8.832, P<0.0001$<br>Multiple comparisons:<br>GFP vs. Non-blocking: 8 min – 60 min, $P<0.0002$<br>GFP vs. DMH <sup>Vgat</sup> blocking: 8 min – 30 min, $P<0.016$<br>GFP vs. DMH <sup>Vglut2</sup> blocking: $P>0.3106$                                 |
| 4n     | 4 mice each                                                                                                                    | RM two-way ANOVA<br>factor one: treatment (Non-blocking, DMH <sup>Vglut2</sup> blocking, DMH <sup>Vgat</sup> blocking)<br>factor two: time<br>Bonferroni's multiple comparisons test               | Treatment: $F(3, 12) = 26.85, P<0.0001$<br>Time: $F(12, 144) = 9.665, P<0.0001$<br>Interaction: $F(36, 144) = 9.762, P<0.0001$<br>Multiple comparisons:<br>Non-blocking vs. DMH <sup>Vglut2</sup> blocking: 40 s – 60 s, $P<0.0001$<br>Non-blocking vs. DMH <sup>Vgat</sup> blocking: 40 s – 60 s, $P<0.0001$<br>Non-blocking vs. GFP: 40 – 60 s, $P<0.0001$        |
| 4o     | 5 mice each                                                                                                                    | RM two-way ANOVA<br>factor one: treatment (Non-blocking, DMH <sup>Vglut2</sup> blocking, DMH <sup>Vgat</sup> blocking, GFP)<br>factor two: time<br>Bonferroni's multiple comparisons test          | Treatment: $F(3, 16) = 3.472, P=0.0410$<br>Time: $F(90, 1440) = 1.897, P<0.0001$<br>Interaction: $F(270, 1440) = 2.218, P<0.0001$<br>Multiple comparisons:<br>Non-blocking vs. GFP: 1 – 14 min, $P<0.01$<br>Non-blocking vs. DMH <sup>Vglut2</sup> blocking: 1 min – 16 min, $P<0.01$<br>Non-blocking vs. DMH <sup>Vgat</sup> blocking: 1 min – 27 min, $P<0.01$    |
| 4q     | ChR2: 6mice                                                                                                                    | RM one-way ANOVA<br>factor one: treatment (ChR2: 24°C, ChR2: 6°C, ChR2: 30°C, )<br>Bonferroni's multiple comparisons test                                                                          | Treatment: $F(2, 15) = 1.890, P=0.1854$<br>Multiple comparisons:<br>30 °C vs. 24 °C: $P=0.7829$<br>24 °C vs. 6 °C: $P=0.7706$                                                                                                                                                                                                                                       |
| 4r     | ChR2: 6mice                                                                                                                    | RM one-way ANOVA<br>factor one: treatment (ChR2: 24°C, ChR2: 6°C, ChR2: 30°C, )<br>Bonferroni's multiple comparisons test                                                                          | Treatment: $F(2, 10) = 14.57, P=0.0011$<br>Multiple comparisons:<br>30 °C vs. 6 °C: $P=0.0012$<br>24 °C vs. 6 °C: $P=0.0027$                                                                                                                                                                                                                                        |
| 5c     | GFP: 9 mice<br>ChR2: 9 mice                                                                                                    | Two-tailed unpaired t test                                                                                                                                                                         | $t=3.205, df=16, P=0.0055$                                                                                                                                                                                                                                                                                                                                          |
| 5g     | ChR2: 9 mice<br>GFP: 5 mice                                                                                                    | RM two-way ANOVA<br>factor one: virus (ChR2, GFP)<br>factor two: time<br>Uncorrected Fisher's LSD test                                                                                             | Virus: $F(1, 12) = 1.604, P=0.2294$<br>Time: $F(33, 396) = 25.36, P<0.0001$<br>Interaction: $F(33, 396) = 1.439, P=0.0590$<br>Multiple comparisons: 10 -16 day, $P<0.0261$                                                                                                                                                                                          |
| 5h     | ChR2: 9 mice<br>GFP: 5 mice                                                                                                    | RM two-way ANOVA<br>factor one: treatment (GFP, ChR2)<br>factor two: time<br>Bonferroni's multiple comparisons test                                                                                | Treatment: $F(1, 168) = 32.50, P<0.0001$<br>Time: $F(13, 168) = 141.0, P<0.0001$<br>Interaction: $F(13, 168) = 0.6262, P=0.8299$<br>Multiple comparisons:<br>$P>0.1307$                                                                                                                                                                                             |
| 5i     | GFP: 6 mice<br>ChR2: 6 mice                                                                                                    | Two-tailed unpaired t test                                                                                                                                                                         | $t=3.348, df=10, P=0.0074$                                                                                                                                                                                                                                                                                                                                          |
| 5j     | GFP: 6 mice<br>ChR2: 6 mice                                                                                                    | Two-tailed unpaired t test                                                                                                                                                                         | $t=2.235, df=10, P=0.0494$                                                                                                                                                                                                                                                                                                                                          |
| 5k     | ChR2: 6 mice<br>GFP: 6 mice                                                                                                    | Ordinary two-way ANOVA<br>factor one: virus (ChR2, GFP)<br>factor two: tissues (fat, lean)<br>Bonferroni's multiple comparisons test                                                               | Virus: $F(1, 20) = 5.225, P=0.0333$<br>Tissues: $F(1, 20) = 130.0, P<0.0001$<br>Interaction: $F(1, 20) = 13.16, P=0.0017$<br>Multiple comparisons:<br>Fat: ChR2 vs. GFP: $P=0.0009$<br>Lean: ChR2 vs. GFP: $P=0.7085$                                                                                                                                               |
| 5l     | ChR2: 9 mice<br>GFP: 5 mice                                                                                                    | Ordinary two-way ANOVA<br>factor one: virus (ChR2, GFP)<br>factor two: time (-200-0, 0-400)<br>Šidák's multiple comparisons test                                                                   | Virus: $F(1, 12) = 4.963, P=0.0458$<br>Time: $F(1, 12) = 354.4, P<0.0001$<br>Interaction: $F(1, 12) = 4.062, P=0.0668$<br>Multiple comparisons:<br>-200 min - 0 min: $P=0.5522$<br>0 min - 400 min: $P=0.0149$                                                                                                                                                      |

(table continued on the next page)

# Supplementary Table 2. Summary of statistical analyses

| Figure | Sample size (n)                                                                                               | Statistical test                                                                                                                                                                            | P values                                                                                                                                                                                                                                |
|--------|---------------------------------------------------------------------------------------------------------------|---------------------------------------------------------------------------------------------------------------------------------------------------------------------------------------------|-----------------------------------------------------------------------------------------------------------------------------------------------------------------------------------------------------------------------------------------|
| 7c     | Chr2: 8 mice<br>GFP: 7 mice                                                                                   | RM two-way ANOVA<br>factor one: virus (Chr2, GFP)<br>factor two: time<br>Bonferroni's multiple comparisons test                                                                             | Virus: $F(1, 13) = 8.669, P=0.0114$<br>Time: $F(90, 1170) = 10.24, P<0.0001$<br>Interaction: $F(90, 1170) = 8.463, P<0.0001$<br>Multiple comparisons:<br>14 min – 49 min: $P<0.0061$                                                    |
| 7d     | Chr2: 8 mice<br>GFP: 7 mice                                                                                   | RM two-way ANOVA<br>factor one: virus (Chr2, GFP)<br>factor two: time<br>Bonferroni's multiple comparisons test                                                                             | Virus: $F(1, 13) = 0.1853, P=0.1965$<br>Time: $F(90, 1170) = 1.020, P<0.4314$<br>Interaction: $F(90, 1170) = 0.8949, P=0.7459$<br>Multiple comparisons: $P>0.9999$                                                                      |
| 7e     | Chr2: 6 mice<br>GFP: 7 mice                                                                                   | RM two-way ANOVA<br>factor one: virus (Chr2, GFP)<br>factor two: time<br>Bonferroni's multiple comparisons test                                                                             | Virus: $F(1, 11) = 31.63, P=0.0002$<br>Time: $F(18, 198) = 7.932, P<0.0001$<br>Interaction: $F(18, 198) = 7.532, P<0.0001$<br>Multiple comparisons:<br>5 min – 40 min: $P<0.0037$                                                       |
| 7f     | Sham: 6 mice<br>Denervation: 6 mice                                                                           | RM two-way ANOVA<br>factor one: treatment (Sham, Denervation)<br>factor two: time<br>Bonferroni's multiple comparisons test                                                                 | Treatment: $F(1, 10) = 3.611, P=0.0866$<br>Time: $F(89, 890) = 12.18, P<0.0001$<br>Interaction: $F(89, 890) = 5.664, P<0.0001$<br>Multiple comparisons:<br>22 min – 34 min: $P<0.0390$                                                  |
| 7g     | SST: 4 mice<br>Vglut2: 4 mice                                                                                 | RM two-way ANOVA<br>factor one: mice (SST, Vglut2)<br>factor two: time<br>Bonferroni's multiple comparisons test                                                                            | Mice: $F(1, 6) = 259.6, P<0.0001$<br>Time: $F(12, 72) = 9.856, P<0.0001$<br>Interaction: $F(12, 72) = 8.922, P<0.0001$<br>Multiple comparisons:<br>40 s – 60 s, $P<0.0001$                                                              |
| 7h     | SST: 8 mice<br>Vglut2: 5 mice                                                                                 | RM two-way ANOVA<br>factor one: mice (SST, Vglut2)<br>factor two: time<br>Bonferroni's multiple comparisons test                                                                            | Mice: $F(2, 15) = 1.564, P=0.2416$<br>Time: $F(89, 1335) = 1.907, P<0.0001$<br>Interaction: $F(178, 1335) = 2.628, P<0.0001$<br>Multiple comparisons:<br>0 min – 16 min, $P<0.0012$                                                     |
| 7k     | Chr2: 6 mice<br>Chr2 + TeNT: 6 mice                                                                           | RM two-way ANOVA<br>factor one: virus (Chr2, Chr2 + TeNT)<br>factor two: time<br>Bonferroni's multiple comparisons test                                                                     | Virus: $F(1, 10) = 0.04145, P=0.8428$<br>Time: $F(2.483, 24.83) = 0.04145, P<0.0001$<br>Interaction: $F(18, 180) = 0.8825, P=6003$<br>Multiple comparisons: $P>0.9878$                                                                  |
| 7l     | Chr2: 6 mice<br>Chr2 + TeNT: 6 mice                                                                           | RM two-way ANOVA<br>factor one: virus (Chr2, Chr2 + TeNT)<br>factor two: time<br>Bonferroni's multiple comparisons test                                                                     | Virus: $F(1, 10) = 0.4483, P=0.5183$<br>Time: $F(4.334, 43.34) = 21.94, P<0.0001$<br>Interaction: $F(18, 180) = 3.162, P<0.0001$<br>Multiple comparisons: $P>0.9999$                                                                    |
| 7n     | taCasp3: 8 mice<br>mCherry: 8 mice                                                                            | RM two-way ANOVA<br>factor one: virus (taCasp3, mCherry)<br>factor two: time<br>Bonferroni's multiple comparisons test                                                                      | Virus: $F(1, 14) = 0.01322, P=0.7216$<br>Time: $F(60, 840) = 35.12, P<0.0001$<br>Interaction: $F(60, 840) = 0.5366, P=0.9985$<br>Multiple comparisons: $P>0.9999$                                                                       |
| 7o     | taCasp3: 8 mice<br>mCherry: 8 mice                                                                            | RM two-way ANOVA<br>factor one: virus (taCasp3, mCherry)<br>factor two: time<br>Bonferroni's multiple comparisons test                                                                      | Virus: $F(1, 14) = 12.95, P=0.0029$<br>Time: $F(60, 455) = 47.2, P<0.0001$<br>Interaction: $F(60, 775) = 12.17, P<0.0001$<br>Multiple comparisons: 180 min – 300 min, $P<0.0014$                                                        |
| 7r     | Non-blocking: 8 mice<br>DMH <sup>Lep&amp;SST-TeNT</sup> : 7 mice<br>DMH <sup>ChAT&amp;SST-TeNT</sup> : 7 mice | RM two-way ANOVA<br>factor one: treatment (Non-blocking, DMH <sup>Lep&amp;SST-TeNT</sup> , DMH <sup>ChAT&amp;SST-TeNT</sup> )<br>factor two: time<br>Bonferroni's multiple comparisons test | Virus: $F(1, 13) = 11.18, P=0.0053$<br>Time: $F(90, 1170) = 13.96, P<0.0001$<br>Interaction: $F(90, 1170) = 4.768, P<0.0001$<br>Multiple comparisons:<br>Non-blocking vs. DMH <sup>Lep&amp;SST-TeNT</sup> , 11 min – 51 min, $P<0.0381$ |

(table continued on the next page)

# Supplementary Table 2. Summary of statistical analyses

| Figure | Sample size (n)                                                                                     | Statistical test                                                                                                                                           | P values                                                                                                                                                                                                                                                                                                                                                                                                                                                                                                                  |
|--------|-----------------------------------------------------------------------------------------------------|------------------------------------------------------------------------------------------------------------------------------------------------------------|---------------------------------------------------------------------------------------------------------------------------------------------------------------------------------------------------------------------------------------------------------------------------------------------------------------------------------------------------------------------------------------------------------------------------------------------------------------------------------------------------------------------------|
| S5d    | GFP: 7 mice<br>DMH <sup>LPB</sup> blocking: 7 mice<br>POA <sup>LPB</sup> blocking: 7 mice           | Ordinary one-way ANOVA<br>factor one: virus (GFP, DMH <sup>LPB</sup> blocking, POA <sup>LPB</sup> blocking)<br>Tukey's multiple comparisons test           | Treatment: $F(2, 3) = 0.4269, P=0.6868$<br>Multiple comparisons:<br>DMH <sup>LPB</sup> blocking vs. POA <sup>LPB</sup> blocking: $P=0.6663$<br>GFP vs. POA <sup>LPB</sup> blocking: $P=0.9211$<br>DMH <sup>LPB</sup> blocking vs. GFP: $P=0.8634$                                                                                                                                                                                                                                                                         |
| S5e    | POA <sup>LPB</sup> -blocking: 7 mice<br>DMH <sup>LPB</sup> -blocking: 7 mice<br>GFP control: 7 mice | Ordinary one-way ANOVA<br>factor: treatment (POA <sup>LPB</sup> -blocking, DMH <sup>LPB</sup> -blocking, GFP control)<br>Tukey's multiple comparisons test | Dark:<br>Treatment: $F(2, 18) = 12.89, P=0.0003$<br>Multiple comparisons:<br>POA <sup>LPB</sup> blocking vs. DMH <sup>LPB</sup> blocking, $P=0.0008$<br>POA <sup>LPB</sup> blocking vs. GFP, $P=0.0012$<br>DMH <sup>LPB</sup> blocking vs. GFP, $P=0.9845$<br>Light:<br>Treatment: $F(2, 18) = 11.33, P=0.0007$<br>Multiple comparisons:<br>POA <sup>LPB</sup> blocking vs. DMH <sup>LPB</sup> blocking, $P=0.0385$<br>POA <sup>LPB</sup> blocking vs. GFP, $P=0.0005$<br>DMH <sup>LPB</sup> blocking vs. GFP, $P=0.1258$ |
| S5f    | POA <sup>LPB</sup> -blocking: 7 mice<br>DMH <sup>LPB</sup> -blocking: 7 mice<br>GFP control: 7 mice | Ordinary one-way ANOVA<br>factor: treatment (POA <sup>LPB</sup> -blocking, DMH <sup>LPB</sup> -blocking, GFP control)<br>Tukey's multiple comparisons test | Dark:<br>Treatment: $F(2, 18) = 3.286, P=0.0607$<br>Multiple comparisons:<br>POA <sup>LPB</sup> blocking vs. DMH <sup>LPB</sup> blocking, $P=0.1670$<br>POA <sup>LPB</sup> blocking vs. GFP, $P=0.8535$<br>DMH <sup>LPB</sup> blocking vs. GFP, $P=0.0623$<br>Light:<br>Treatment: $F(2, 18) = 7.078, P=0.0054$<br>Multiple comparisons:<br>POA <sup>LPB</sup> blocking vs. DMH <sup>LPB</sup> blocking, $P=0.0678$<br>POA <sup>LPB</sup> blocking vs. GFP, $P=0.0043$<br>DMH <sup>LPB</sup> blocking vs. GFP, $P=0.4060$ |
| S7g    | GFP: 7 mice<br>TeNT: 9 mice                                                                         | RM two-way ANOVA<br>factor one: virus (GFP, TeNT)<br>factor two: time<br>Šidák's multiple comparisons test                                                 | Virus: $F(1, 14) = 30.61$<br>Time: $F(2.366, 32.19) = 23.09$ ,<br><i>Geisser-Greenhouse's epsilon</i> , 0.04929<br>Interaction: $F(48, 653) = 11.95$<br>Multiple comparisons:<br>90 min – 150 min, $P<0.0152$                                                                                                                                                                                                                                                                                                             |
| S7j    | GFP: 5 mice<br>TeNT: 7 mice                                                                         | RM two-way ANOVA<br>factor one: virus (GFP, TeNT)<br>factor two: time<br>Bonferroni's multiple comparisons test                                            | Virus: $F(1, 10) = 17.18, P=0.0020$<br>Time: $F(31, 310) = 10.98, P<0.0001$<br>Interaction: $F(31, 310) = 4.533, P<0.0001$<br>Multiple comparisons:<br>70 min – 140 min, $P<0.0288$                                                                                                                                                                                                                                                                                                                                       |
| S7m    | GFP: 4 mice<br>TeNT: 7 mice                                                                         | RM two-way ANOVA<br>factor one: virus (GFP, TeNT)<br>factor two: time<br>Bonferroni's multiple comparisons test                                            | Virus: $F(1, 9) = 5.940, P=0.0375$<br>Time: $F(48, 432) = 28.06, P<0.0001$<br>Interaction: $F(48, 432) = 7.574, P<0.0001$<br>Multiple comparisons:<br>90 min – 180 min, $P<0.0254$                                                                                                                                                                                                                                                                                                                                        |
| S9d    | mCherry: 6 mice<br>Chr2: 6 mice                                                                     | RM two-way ANOVA<br>factor one: virus (mCherry, Chr2)<br>factor two: time<br>Uncorrected Fisher's LSD test                                                 | Time: $F(2.154, 21.54) = 5.879, P=0.0081$<br>Virus: $F(1, 10) = 5.952, P=0.0349$<br>Interaction: $F(90, 900) = 4.427, P<0.0001$<br>Multiple comparisons:<br>13 min – 42 min, $P<0.0455$                                                                                                                                                                                                                                                                                                                                   |
| S9g    | Saline: 7 mice<br>CNO: 7 mice                                                                       | RM two-way ANOVA<br>factor one: treatment (Saline, CNO)<br>factor two: time<br>Šidák's multiple comparisons test                                           | Time: $F(3.850, 46.20) = 13.31, P<0.0001$<br>Virus: $F(1, 12) = 14.28, P=0.0026$<br>Interaction: $F(21, 252) = 3.975, P<0.0001$<br>Multiple comparisons:<br>20 min – 40 min, $P<0.0204$<br>60 min – 90 min, $P<0.0199$                                                                                                                                                                                                                                                                                                    |
| S9i    | Saline: 12 mice<br>CNO: 12 mice                                                                     | RM two-way ANOVA<br>factor one: treatment (Saline, CNO)<br>factor two: time<br>Šidák's multiple comparisons test                                           | Time: $F(5.349, 117.7) = 4.384, P=0.0008$<br>Virus: $F(1, 22) = 28.07, P<0.0001$<br>Interaction: $F(21, 462) = 3.374, P<0.0001$<br>Multiple comparisons:<br>20 min – 130 min, $P<0.0313$<br>150 min, $P=0.0076$<br>170 min-180 min, $P<0.0018$                                                                                                                                                                                                                                                                            |

(table continued on the next page)

# Supplementary Table 2. Summary of statistical analyses

| Figure | Sample size (n)                 | Statistical test                                                                                               | P values                                                                                                                                                                                                                                                                                                           |
|--------|---------------------------------|----------------------------------------------------------------------------------------------------------------|--------------------------------------------------------------------------------------------------------------------------------------------------------------------------------------------------------------------------------------------------------------------------------------------------------------------|
| S10b   | GFP: 6 mice<br>ChR2: 9 mice     | RM two-way ANOVA<br>factor one: virus (GFP, ChR2)<br>factor two: time<br>Uncorrected Fisher's LSD test         | Time: $F(3.876, 50.39) = 11.51, P < 0.0001$<br>Virus: $F(1, 13) = 1.662, P = 0.2198$<br>Interaction: $F(90, 1170) = 7.278, P < 0.0001$<br>Multiple comparisons:<br>4 min – 35 min, $P < 0.0418$                                                                                                                    |
| S10f   | mCherry: 6 mice<br>TeNT: 6 mice | Two-tailed unpaired t test                                                                                     | $t = 1.293, df = 10,$<br>$P = 0.2251$                                                                                                                                                                                                                                                                              |
|        | mCherry: 6 mice<br>TeNT: 6 mice | Two-tailed unpaired t test                                                                                     | $t = 1.677, df = 10,$<br>$P = 0.1245$                                                                                                                                                                                                                                                                              |
| S10g   | mCherry: 7 mice<br>TeNT: 6 mice | RM two-way ANOVA<br>factor one: virus (mCherry, TeNT)<br>factor two: time<br>Uncorrected Fisher's LSD test     | Virus: $F(1, 11) = 7.392, P = 0.0200$<br>Time: $F(90.00, 990.0) = 2.188, P < 0.0001$<br>Interaction: $F(90, 990) = 8.050, P < 0.0001$<br>Multiple comparisons:<br>7 min – 42 min, $P < 0.0415$                                                                                                                     |
| S10h   | mCherry: 7 mice<br>TeNT: 6 mice | RM two-way ANOVA<br>factor one: virus (mCherry, TeNT)<br>factor two: time<br>Uncorrected Fisher's LSD test     | Virus: $F(1, 11) = 4.405, P = 0.0597$<br>Time: $F(90, 990) = 3.534, P < 0.0001$<br>Interaction: $F(90, 990) = 2.707, P < 0.0001$<br>Multiple comparisons:<br>1 min – 3 min, $P < 0.0448$<br>6 min – 19 min, $P < 0.0457$<br>21 min – 24 min, $P < 0.0404$<br>30 min, $P = 0.0406$<br>33 min – 34 min, $P < 0.0335$ |
| S10i   | mCherry: 5 mice<br>TeNT: 4 mice | RM two-way ANOVA<br>factor one: virus (mCherry, TeNT)<br>factor two: time<br>Šídák's multiple comparisons test | Virus: $F(1, 7) = 5.880, P = 0.0458$<br>Time: $F(2.537, 17.76) = 4.565, P = 0.0190$<br>Interaction: $F(11, 77) = 2.039, P = 0.0356$<br>Multiple comparisons:<br>10 min, $P = 0.0217$                                                                                                                               |
| S10j   | mCherry: 5 mice<br>TeNT: 4 mice | RM two-way ANOVA<br>factor one: virus (mCherry, TeNT)<br>factor two: time<br>Šídák's multiple comparisons test | Virus: $F(1, 7) = 1.922, P = 0.2082$<br>Time: $F(6, 42) = 3.137, P = 0.0124$<br>Interaction: $F(6, 42) = 3.162, P = 0.0119$<br>Multiple comparisons:<br>80 min, $P = 0.0344$                                                                                                                                       |
| S10m   | GFP: 6 mice<br>TeNT: 5 mice     | RM two-way ANOVA<br>factor one: virus (GFP, TeNT)<br>factor two: time<br>Uncorrected Fisher's LSD test         | Virus: $F(1, 9) = 3.135, P = 0.1104$<br>Time: $F(1, 9) = 24.71, P = 0.0008$<br>Interaction: $F(1, 9) = 3.036, P = 0.1154$<br>Multiple comparisons:<br>Light, $P = 0.5038$<br>Dark, $P = 0.0275$                                                                                                                    |
|        | GFP: 6 mice<br>TeNT: 5 mice     | RM two-way ANOVA<br>factor one: virus (GFP, TeNT)<br>factor two: time<br>Uncorrected Fisher's LSD test         | Virus: $F(1, 9) = 3.809, P = 0.0827$<br>Time: $F(1, 9) = 13.09, P = 0.0056$<br>Interaction: $F(1, 9) = 1.791, P = 0.2137$<br>Multiple comparisons:<br>Light, $P = 0.6648$<br>Dark, $P = 0.0318$                                                                                                                    |
| S10n   | GFP: 6 mice<br>TeNT: 6 mice     | RM two-way ANOVA<br>factor one: virus (GFP, TeNT)<br>factor two: time<br>Šídák's multiple comparisons test     | Virus: $F(1, 10) = 34.35, P = 0.0002$<br>Time: $F(3.926, 39.26) = 6.699, P = 0.0004$<br>Interaction: $F(91, 910) = 6.330, P < 0.0001$<br>Multiple comparisons:<br>11 min-18 min, $P < 0.0463$<br>37 min-38 min, $P < 0.0418$<br>41 min, $P = 0.0476$                                                               |
| S10o   | GFP: 6 mice<br>TeNT: 6 mice     | RM two-way ANOVA<br>factor one: virus (GFP, TeNT)<br>factor two: time<br>Šídák's multiple comparisons test     | Virus: $F(1, 10) = 9.150, P = 0.0128$<br>Time: $F(1, 10) = 19.65, P = 0.0013$<br>Interaction: $F(1, 10) = 0.3412, P = 0.5721$<br>Multiple comparisons:<br>-30-0 min VS. 0-30 min: TeNT, $P = 0.0106$<br>GFP, $P = 0.0426$<br>TeNT VS. GFP: -30-0 min, $P = 0.0229$<br>0-30 min, $P = 0.0119$                       |
