# Supplementary material for: A parabrachial-hypothalamic parallel circuit governs cold defense in mice
Source: PubMed Central journal article supplement (PMC10427655; doi:10.1038/s41467-023-40504-6), 2023-08-15
Supplement: 41467_2023_40504_MOESM2_ESM.pdf [file 41467_2023_40504_MOESM2_ESM.pdf]

## Peer Review File

---

A parabrachial-hypothalamic parallel circuit governs cold defense in mice

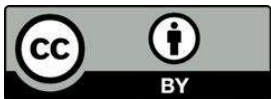

**Open Access** This file is licensed under a Creative Commons Attribution 4.0

International License, which permits use, sharing, adaptation, distribution and reproduction in any medium or format, as long as you give appropriate credit to

the original author(s) and the source, provide a link to the Creative Commons license, and indicate if changes were made. In the cases where the authors are anonymous, such as is the case for the reports of anonymous peer reviewers, author attribution should be to 'Anonymous Referee' followed by a clear attribution to the source work. The images or other third party material in this file are included in the article's Creative Commons license, unless indicated otherwise in a credit line to the material. If material is not included in the article's Creative Commons license and your intended use is not permitted by statutory regulation or exceeds the permitted use, you will need to obtain permission directly from the copyright holder. To view a copy of this license, visit <http://creativecommons.org/licenses/by/4.0/>.

## REVIEWER COMMENTS

### Reviewer #1 (Remarks to the Author):

In this study, Yang and colleagues used interdisciplinary techniques to illustrate the involvement of the lateral Parabrachial (LPB)- dorsomedial hypothalamus (DMH) in cold defense response for thermoregulation in mice, which complements previous findings that LPB to the preoptic area (POA) in regulating body temperature in mice. Specifically, aided by cre-dependent AAV tracing and c-Fos staining, the authors identified LPB Vglut-2 neurons projecting to POA and DMH are both responses to cold/warm exposure. Next, they used in vivo fiber photometry for neuronal calcium activities and observed LPB Vglut2-to-DMH pathways are robustly activated during gradients of cooling exposures. By employing a series of neuronal activity manipulations, they revealed that LPB→POA/DMH pathways form parallel roles in cold defense. Additionally, optogenetic activation shows LPB Vglut2→DMH pathway induces strong hyperthermia. Moreover, by selectively blocking the synaptic outputs of the downstream neurons using cell type-specific expression of TeNT, they found cold-defense responses depend on both Vglut2 and Vgat-expressing neurons in the DMH but not POA Vglut2-neurons. Notably, blocking both LPB→POA/DMH pathways exhibited a much stronger impairment in cold defense, suggesting a cumulative or additive effect of the two pathways. Activation of the LPB Vglut2→DMH pathway rapidly relieves hypothermia, increases iBAT thermogenesis, and suppresses body weight gain. Using retro-TRAP-seq, they identify DMH-projecting LPB SST neurons as cold-activated neurons. Finally, they showed LPB SST→DMH pathway increases Tcore via iBAT thermogenesis and is required for cold defense. Overall, this comprehensive study revealed an important central mechanism in understanding how neuronal circuits affect thermoregulation. The design of this study is straightforward, and the results are novel, exciting, and convincing. I have the following comments for the authors that will hopefully help them to improve the paper.

### Major comments:

Their data shows that LPB neurons were activated in responding to cold exposure, and ~60% project to POA or DMH, and the authors claim that the two projecting pathways work in parallel in cold defense. I wondered if other parallel pathways work in concert with the POA and DMH projections in cold defense. This should either be tested or discussed.

It is convincing that the authors had shown multiple experiments that the activation LPB Vglut2-DMH pathway induces a strong cold defense response. In figure 4e-g the authors showed that DMH terminal activation could overcome LPB Vglut-2 soma hM4Di inhibition. Can the author show that chemogenetic inhibition can prevent the possible backpropagation of action potentials induced by the chemogenetic stimulation at the terminals? Moreover, I wonder if LPB Vglut-2 soma hM4Di inhibition would decrease Tcore? Although Figure 4g may argue against it, it is unclear why saline injection will cause an apparent slight decrease in the core temperature, similar to the CNO injection condition.

Several points need to be clarified for the optogenetic activation experiments. It is unclear what frequency and intensity are used in most paradigms. Have the authors evaluated the best photoactivation frequency in LPB-POA/DMH pathways? In Figure 5, what is the rationale for using 12 mw, 10 Hz 10 ms, 30-min per 2-h, 4 loops per day photoactivation? How robust could the LPB-DMH neuron follow this manipulation?

It is convincing that LPB SST-DMH plays an important function in cold defense. I would suggest that the author verify the colonization of SST and Vlut2 within in LPB region since SST are robust GABAergic neuron makers in most cases. If they do not totally overlap with Vglut2, are they GABAergic? Moreover, this may be beyond the scope of the current study. I wonder if SST, as a neuropeptide, is involved in the LPB SST-DMH pathway to modulate temperature regulation.

In figure 7, the author used SST-cre cross with LepR-cre or ChAT-cre mouse. Is it possible that DMH also has SST neurons?

Reviewer #2 (Remarks to the Author):

In this manuscript, the author characterized a new LPB→DMH pathway that is important for cold defensive behaviors. The battery of viral tools used in this manuscript is very impressive and the author provided solid data to support the LPB→DMH pathway in cold defense. However, results from this manuscript also raised some puzzling but important questions. These questions need to be address before we can put this new discovery in the context of our understanding of the central pathway for thermoregulation.

1. Why both LPB→DMH and LPB→MPO pathways are required for cold defensive behaviors? What is relationship between neurons in DMH and MPO that received inputs from LPB?
2. Similarly, why both DMHvglut2 vs. DMHVgat are required for cold induced defensive behavior?
3. In Fig.5F, why body weight no longer increase after light stimulation start in control mice? could it be the stress caused by long term light stimulation? why not using chemogenetic stimulation which could be less stressful?
4. Because LPBSST neurons also project to MPO? What is the percentage of LPBSST neurons→MPO neurons are Fos+ after cold stimulus?
5. There are so many markers for the DMH projecting LPBVglut2 neurons? are these neurons co-label same neurons or they label different population of neurons? this question is important because LPBSST neurons only represent less than 20% of Fos+ neurons after cold stimulus.
6. Are LPB is the only input to drive cold response in the DMH?

Minor point:

1. Because the limited retrograde efficiency of retrograde tracing virus, the conclusion of '20% projected to both regions' is likely underestimate.
2. Using terminal fiber photometry to study the kinetics of temperature response is not very meaningful, as they could be strongly modulate by varies autoreceptors located in the terminal.

Reviewer #3 (Remarks to the Author):

In this paper, the authors examine the hypothesis that cold responsive neurons in the lateral parabrachial nucleus (LPB) project to the dorsomedial nucleus of the hypothalamus, where they activate cold-defense pathways. I typically begin a review with a summary of all of the experiments that were done, however, that is nearly impossible for this paper. It is extremely long (over 7,000 words) and gives the results of over 40 experiments, many of which are very complicated. In most cases, there is no n given (in others where it is given, it is often very low numbers, such as 3 animals), and in no case is there given sufficient detail on injection placement (some of these injections have to miss their targets, but there is no information on how many total animals were done, how they picked the small number of animals they present, or what the anatomical controls, i.e., missed injections, showed), controls are not done for many key experiments, and it is rare to find any statistical analysis.

Having said that, I think this is an interesting story, which would be of interest to many scientists who work on thermoregulation. But it is impossible to evaluate the work critically in its current state because so much of the necessary information on the rigor of the experiments is missing. I would strongly encourage the authors, to include complete information for each experiment. This would include the power analysis that should have been done before the studies were started indicating the number of animals that should be in each group; the actual numbers of animals used in each experiment; how they chose which ones to present in the paper; details about the actual results in the animals that are included and the ones that are not included, as well as controls; how they did the statistics; and what the statistical findings were. This is particularly important for experiments involving stereotaxic injections, some of which will miss their intended target. How were those cases identified? They should be analyzed by someone who does not know the physiological results. The ones that hit the target should be analyzed separately from those that missed the target, which then serve as anatomical controls. But you need to present heat maps showing the actual injection placements in both sets of animals.

## Responses to Reviewers

### Reviewer #1 (Remarks to the Author):

In this study, Yang and colleagues used interdisciplinary techniques to illustrate the involvement of the lateral Parabrachial (LPB)- dorsomedial hypothalamus (DMH) in cold defense response for thermoregulation in mice, which complements previous findings that LPB to the preoptic area (POA) in regulating body temperature in mice. Specifically, aided by cre-dependent AAV tracing and c-Fos staining, the authors identified LPB Vglut-2 neurons projecting to POA and DMH are both responses to cold/warm exposure. Next, they used in vivo fiber photometry for neuronal calcium activities and observed LPB Vglut2-to-DMH pathways are robustly activated during gradients of cooling exposures. By employing a series of neuronal activity manipulations, they revealed that LPB→POA/DMH pathways form parallel roles in cold defense. Additionally, optogenetic activation shows LPB<sup>Vglut2</sup>→DMH pathway induces strong hyperthermia. Moreover, by selectively blocking the synaptic outputs of the downstream neurons using cell type-specific expression of TeNT, they found cold-defense responses depend on both Vglut2 and Vgat-expressing neurons in the DMH but not POA<sup>Vglut2</sup>-neurons. Notably, blocking both LPB→POA/DMH pathways exhibited a much stronger impairment in cold defense, suggesting a cumulative or additive effect of the two pathways. Activation of the LPB<sup>Vglut2</sup>→DMH pathway rapidly relieves hypothermia, increases iBAT thermogenesis, and suppresses body weight gain. Using retro-TRAP-seq, they identify DMH-projecting LPB SST neurons as cold-activated neurons. Finally, they showed LPB SST→DMH pathway increases  $T_{core}$  via iBAT thermogenesis and is required for cold defense. Overall, this comprehensive study revealed an important central mechanism in understanding how neuronal circuits affect thermoregulation. The design of this study is straightforward, and the results are novel, exciting, and convincing. I have the following comments for the authors that will hopefully help them to improve the paper.

R: Thanks for the appreciation of our efforts in the dissection of the cold-defense circuit.

Major comments:

36 Their data shows that LPB neurons were activated in responding to cold  
37 exposure, and ~60% project to POA or DMH, and the authors claim that the  
38 two projecting pathways work in parallel in cold defense. I wondered if other  
39 parallel pathways work in concert with the POA and DMH projections in cold  
40 defense. This should either be tested or discussed.

41 R: We appreciate the attention given to this matter. The DMH-projecting  
42  $LPB^{Vglut2}$  neurons were found to project to several brain regions, including the  
43 LH and VMH, as shown in **Extended Data Fig. 3**. Nevertheless, the LPB→LH  
44 projection was demonstrated to be dispensable for cold-induced thermogenesis,  
45 as evidenced by **Cited Fig. 1L (1)**. Furthermore, although LPB neurons  
46 projecting to the VMH were predominantly located in the LPBc region, as  
47 depicted in **Cited Fig. 2b, c. (2)**, they were not co-localized with the LPB<sub>el</sub>  
48 neurons that were activated by cold stimuli. Thus, we have included a  
49 discussion in **lines 606-613**, noting that "it is noteworthy that the LPB neurons  
50 projecting to the POA/DMH region also have projections to other brain regions  
51 involved in thermoregulation, such as the LH and VMH (**Extended Data Fig.**  
52 **3**). However, the LPB→LH projection was not found to be necessary for cold-  
53 induced thermogenesis (1), and the VMH-projecting LPB neurons were not  
54 responsive to cold stimuli (2, 3). Further investigation is necessary to ascertain  
55 the existence of parallel pathways that operate in conjunction with the  
56 LPB→POA/DMH projections."

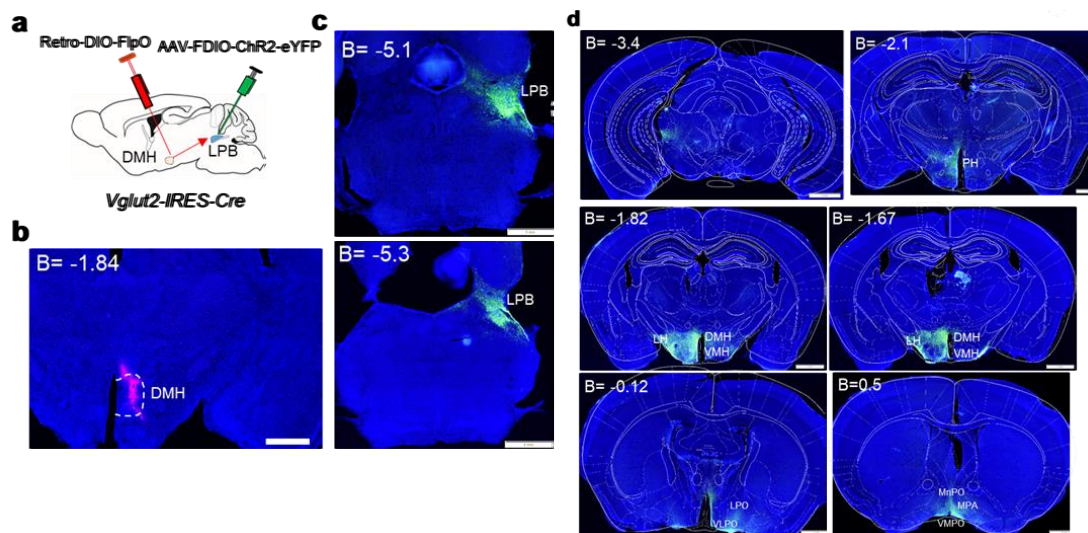

57 **Extended Data Fig. 3 | Projection pattern of DMH-projecting  $LPB^{Vglut2}$**   
58 **neurons throughout the brain.** (a) Scheme for mapping the axonal  
59 projections of DMH-projecting  $LPB^{Vglut2}$  neurons. For labeling DMH-projecting  
60  $LPB^{Vglut2}$  neurons, retrograde AAVs carrying Cre-dependent FlpO were injected  
61 in the DMH, which drove the expression of FlpO-dependent ChR2-eYFP in the

62 LPB. A red tracer (CTB647) was co-injected into the DMH to indicate the  
 63 injection sites. (b) Representative image showing the injection sites in the DMH  
 64 viewed by red tracer (CTB647). (c) Representative images showing ChR2-  
 65 eYFP expression in DMH-projecting LPB<sup>Vglut2</sup> neurons in the LPB. (d)  
 66 Representative images are showing ChR2-eYFP expression in axonal  
 67 terminals at various brain sites.

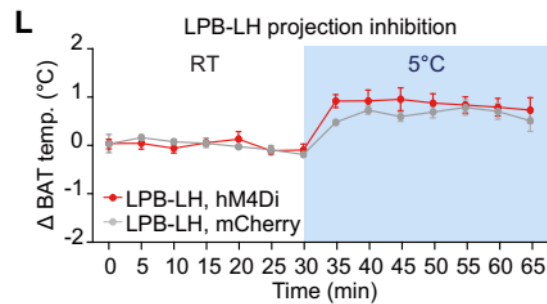

68

69 **Cited Fig. 1** | (L) LPB-LH projection inhibition had no effect on iBAT  
 70 temperature during cold challenge. Cited from (1).

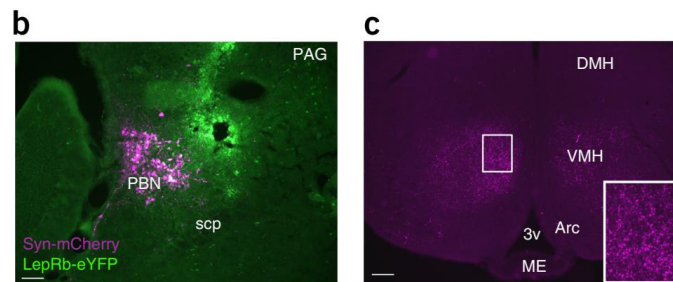

71

72 **Cited Fig. 2** | (b) LPB lepR positive neurons mainly distributed in LPBc and  
 73 send projections to VMH (c). Cited from (2).

74

75 It is convincing that the authors had shown multiple experiments that the  
 76 activation LPB<sup>Vglut2</sup>-DMH pathway induces a strong cold defense response. In  
 77 figure 4e-g the authors showed that DMH terminal activation could overcome  
 78 LPB<sup>Vglut-2</sup> soma hM4Di inhibition. Can the author show that chemogenetic  
 79 inhibition can prevent the possible backpropagation of action potentials induced  
 80 by the chemogenetic (optogenetic?) stimulation at the terminals?

81 **R:** We acknowledge the potential concern of backpropagation of action  
 82 potentials in optogenetic experiments. However, the limited literature on this  
 83 topic suggests that this issue may be overestimated. To address this concern,  
 84 it would be ideal for us to conduct electrophysiological recordings of  
 85 backpropagation of action potentials in LPB brain slices. As simultaneous  
 86 activation of DMH terminals and recording of backpropagation of action

87 potentials in LPB brain slices is technically challenging due to the long distance  
88 between LPB and DMH, we directly recorded calcium activity in vivo. We used  
89 red-shift opto-tools ChrimsonR to estimate whether photoactivated DMH  
90 terminals were strong enough to evoke calcium activity in LPB somata. Co-  
91 expression of GCaMP6s, DREADD-Gi, and ChrimsonR was done in the LPB,  
92 followed by the activation of DMH terminals using a 589-nm laser (**Reviewer  
93 only Fig. 1a**). Ca<sup>2+</sup> activity was recorded in the LPB, and we confirmed that  
94 DMH terminal photostimulation could induce hyperactivity, and DREADD-Gi  
95 inhibition could substantially reduce LPB somatic neural calcium activity  
96 (**Reviewer only Fig. 1b-c**). However, we did not observe any calcium signal  
97 changes in LPB somata due to DMH terminal photoactivation (in short or long  
98 terms) (**Extended Data Fig. 7c**). Thus, we conclude that backpropagated  
99 action potentials are too weak to be detected by in vivo calcium signals.  
100 Additionally, we argue that if any undetected backpropagation of action  
101 potentials exists, it should be blocked by DREADD-Gi inhibition since Gi  
102 inhibition has a larger impact on LPB neural activity than that of DMH terminal  
103 photoactivation.

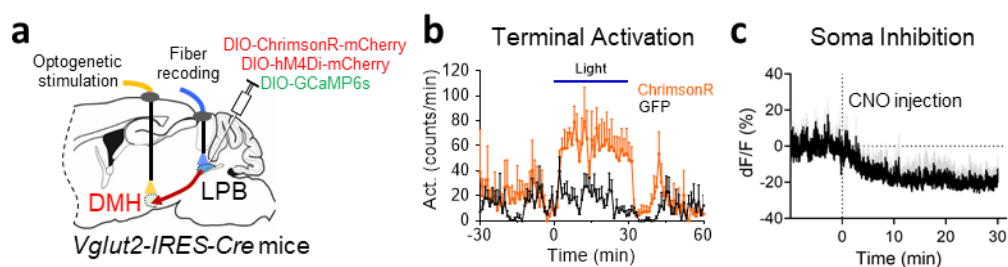

104

105 **Reviewer only Fig. 1** | (a) Simultaneously expressing the GCaMP6s,  
106 DREADD-Gi and ChrimsonR in the LPB, then the DMH terminals were  
107 simultaneously activated using a 589nm laser and Ca<sup>2+</sup> activity was recorded  
108 in the LPB; (b) Photoactivation of DMH terminal with ChrimsonR result in  
109 hyperactivity. (c) LPB neurons' calcium activity was inhibited by hM4Di after  
110 CNO injection.

111



**C LPB Soma Recording while DMH Terminal Activation**

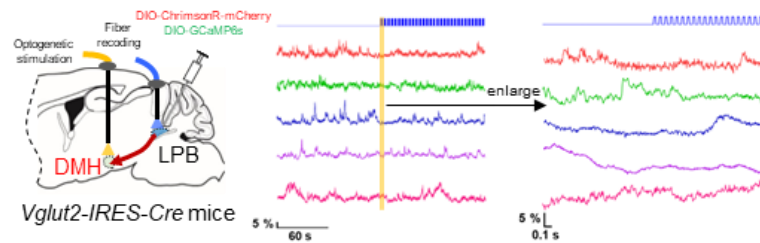

112

113 **Extended Data Fig. 7** | (c) Scheme for simultaneously expressing the  
 114 GCaMP6s and ChrimsonR in the LPB, then the DMH terminals were  
 115 simultaneously activated using a 589nm laser and  $Ca^{2+}$  activity was recorded  
 116 in the LPB (left panel). No obvious calcium signal changes were recorded in  
 117 LPB after activating DMH's terminals (n = 5 mice). The blue pulse line indicates  
 118 light stimulation (right panel). Light pattern: 589 nm, 6 mW, 10 Hz, 10 ms, 2-s  
 119 on followed by 2-s off, with the cycles repeating for 10 min.

120

121 Moreover, I wonder if LPB  $V_{glut-2}$  soma hM4Di inhibition would decrease  $T_{core}$ ?

122 **R:** In brief, we did not find that acute inhibition of LPB $V_{glut2}$  soma with hM4Di  
 123 changed  $T_{core}$ . As previously reported (**Cited Fig. 3**) (3), broad activation of  
 124 LPB $V_{glut2}$  soma can lead to hypothermia or hyperthermia, depending on the  
 125 stimulation frequency. Therefore, it is not surprising that broad inhibition of  
 126 LPB $V_{glut2}$  neurons did not alter  $T_{core}$ , as there are mixed hypothermic and  
 127 hyperthermic effects in this region. Our results show that the acute increase of  
 128  $T_{core}$  after Sal/CNO injection was induced by stress, as indicated in the baseline  
 129 data before injection (**Fig. 4g**).

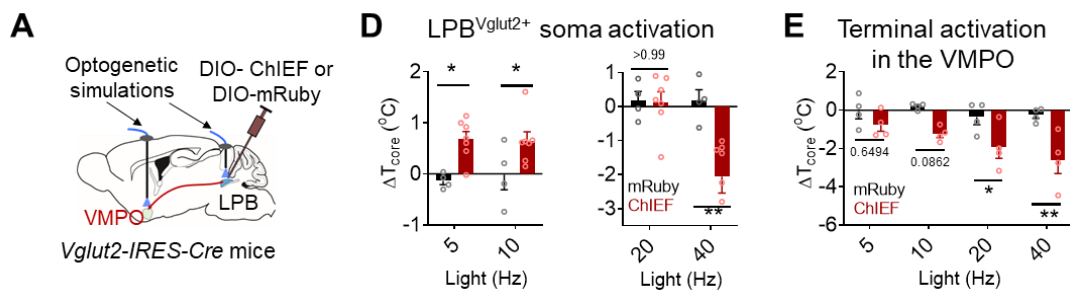

130

131 **Cited Fig. 3** | The change of  $T_{core}$  after photoactivation of LPB $V_{glut2}$  soma (D)  
 132 and VMPO terminal (E) with different frequencies. Light pattern: 473 nm, 6 mW,  
 133 5/10/20/40 Hz, 10 ms, 2-s on followed by 2-s off, with the cycles repeating for  
 134 30 min.

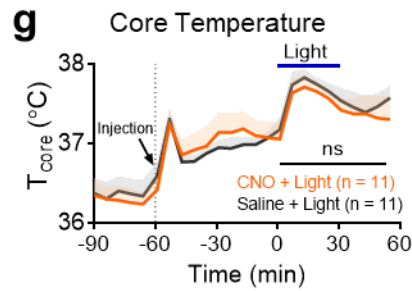

135

136 **Fig. 4 | (g)** Changes in  $T_{\text{core}}$  after activating the  $\text{LPB}^{\text{Vglut2}} \rightarrow \text{DMH}$  projection while  
 137 blocking LPB neurons ( $n = 11$  mice). CNO was injected at -60 min to silence  
 138 neurons as indicated (i.p., 10 mg/kg) and saline was used as the control.

139

140 Although Figure 4g may argue against it, it is unclear why saline injection will  
 141 cause an apparent slight decrease in the core temperature, similar to the CNO  
 142 injection condition.

143 **R:** As previously mentioned (**Fig. 4g**), the observed phenomenon involves the  
 144 restoration of normothermia following an acute increase in  $T_{\text{core}}$  induced by  
 145 Sal/CNO injection-induced stress and is not a hypothermia response.

146

147 Several points need to be clarified for the optogenetic activation experiments.  
 148 It is unclear what frequency and intensity are used in most paradigms. Have  
 149 the authors evaluated the best photoactivation frequency in LPB-POA/DMH  
 150 pathways?

151 **R:** We have provided information regarding the frequency and intensity of  
 152 optogenetic activation experiments in the figure legend (6 or 12mW 10 Hz, 10  
 153 ms, 2-s on followed by 2-s off, with the cycles repeating for 30 min). We did  
 154 evaluate the photoactivation frequency for both pathways and published the  
 155 data for stimulation of the LPB-POA pathway (3). We did observe that the  
 156 hypothermia induced by terminal activation of the LPB  $\rightarrow$  POA pathway  
 157 increased as the photoactivation frequency increased (**Cited Fig. 3**) (3). In the  
 158 case of the LPB  $\rightarrow$  DMH pathway, we found that hyperthermia induced by 10-  
 159 Hz photoactivation was greater than that induced by 5 Hz and 20 Hz, although  
 160 this difference was not statistically significant. We have now added this data to  
 161 **Extended Data Fig. 7a, b.**

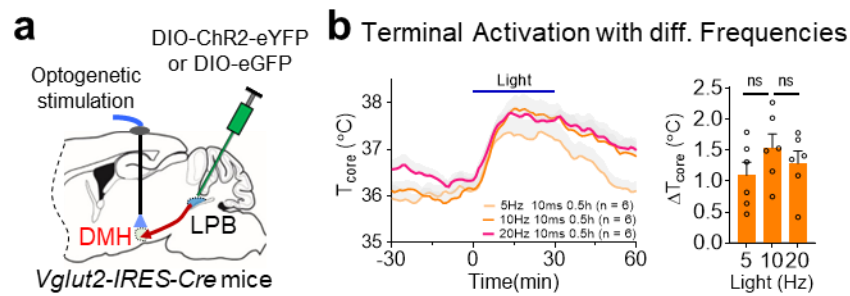

162

163 **Extended Data Fig. 7** | (a-b) The change of  $T_{core}$  after photoactivation of  
 164 LPB<sup>Vglut2</sup> DMH terminal with different frequencies. Light pattern: 473 nm, 12 mW,  
 165 5/10/20 Hz, 10 ms, 2-s on followed by 2-s off, with the cycles repeating for 30  
 166 min.

167

168 In Figure 5, what is the rationale for using 12 mw, 10 Hz 10 ms, 30-min per 2-  
 169 h, 4 loops per day photoactivation? How robust could the LPB-DMH neuron  
 170 follow this manipulation?

171 **R:** In our study, experiments were primarily conducted during the active phase  
 172 of the mice (9:00 am- 9:00 pm). Each mouse required fiber attachment and  
 173 equipment setup, which typically took 1-2 hours. Therefore, the available time  
 174 for photoactivation was limited to 9-10 hours. In addition, to ensure adequate  
 175 recovery time from the previous photoactivation (which lasted 1-1.5 hours),  
 176 each photoactivation session was limited to 30 minutes. Thus, we could only  
 177 perform a maximum of 4 photoactivation sessions per day. As illustrated in **Fig.**  
 178 **5e**, the LPB-DMH neurons exhibited a robust response to optogenetic  
 179 manipulation, resulting in a 1-1.5 $^{\circ}\text{C}$  increase in  $T_{core}$ . We have included this data  
 180 in our figures for reference.

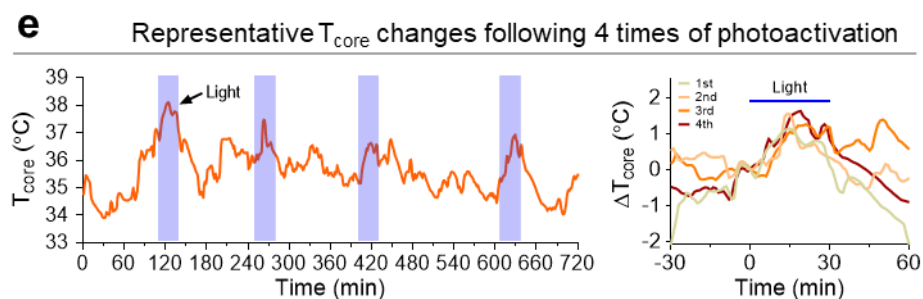

181

182 **Fig. 5** | (e) The change of  $T_{core}$  after 4 times photoactivation (left panel) of  
 183 LPB<sup>Vglut2</sup> DMH terminal and the comparison (right panel) of  $T_{core}$  change for  
 184 each photoactivation.

185



210 **Fig. 6** | (a) Projection-specific transcriptomic analysis (retro-TRAP), where  
211 GFP-tagged translational ribosomes from DMH-projecting LPB<sup>Vglut2</sup> neurons  
212 were immunoprecipitated and associated mRNAs were sequenced. Retrograde  
213 tracing virus carrying Cre-dependent GFP-tagged ribosomal protein L10 (AAV-  
214 Retro-hEF1a-FLEX-GFPL10) was injected into the DMH, which traveled to the  
215 LPB and expressed GFPL10 after recombination by Vglut2-IRES-Cre. SST,  
216 somatostatin. (b) Volcano plots (q value versus log2 fold change) for LPB  
217 mRNAs after retro-TRAP sequencing. (c) Retro-TRAP fold enrichment (IP/Input)  
218 for PB-expressed genes downloaded from the Allen Institute.

219

220 In regard to the second question, it is worth noting that the SST peptide was  
221 administered into the brain over 50 years ago, and numerous studies (8-11)  
222 have since reported that this injection can induce hyperthermia, particularly  
223 when targeting the DMH. It would be interesting to explore the potential role of  
224 endogenous SST peptide in thermoregulation in future research.

225

226 In figure 7, the author used SST-cre cross with LepR-cre or ChAT-cre mouse.  
227 Is it possible that DMH also has SST neurons?

228 R: We would like to acknowledge that the data referred to by the reviewer has  
229 indeed been included in **Fig. 7q** of our manuscript. In addition, we have  
230 provided clarification in **lines 519-521** of our manuscript by stating that "since  
231 SST-Cre is also expressed in the DMH (**Fig. 7q, left panel**).". Furthermore, our  
232 statement "blocking DMH<sup>ChAT+SST</sup> neurons had no effect" serves to exclude the  
233 role of DMH<sup>SST</sup> neurons in this manipulation.

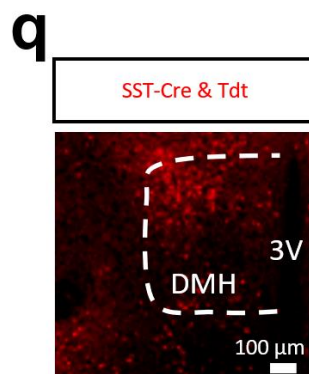

234

235 **Fig. 7** | (q) Representative SST-Cre & Tdt expression in the DMH.

236

237 **Reviewer #2 (Remarks to the Author):**

238

239 In this manuscript, the author characterized a new LPB→DMH pathway that is  
240 important for cold defensive behaviors. The battery of viral tools used in this  
241 manuscript is very impressive and the author provided solid data to support the  
242 LPB→DMH pathway in cold defense. However, results from this manuscript  
243 also raised some puzzling but important questions. These questions need to be  
244 addressed before we can put this new discovery in the context of our  
245 understanding of the central pathway for thermoregulation.

246

247 1. Why both LPB→DMH and LPB→MPO pathways are required for cold  
248 defensive behaviors? What is the relationship between neurons in DMH and  
249 MPO that received inputs from LPB?

250 **R:** For the first question why two parallel pathways are required in cold defenses.  
251 As we wrote in the discussion section: “The evolution of parallel neural circuits  
252 in cold defense not only enables resilience to hypothermia but also provides a  
253 scalable, robust, and efficient network in heat production when both pathways  
254 are recruited.” (lines 618-621). In line with this hypothesis, we have presented  
255 data to show that activation of the LPB→DMH pathway is powerful enough to  
256 reverse cold-induced hypothermia (Fig. 4p-r). Furthermore, we have shown  
257 that both pathways are additively or synergistically required to boost cold  
258 defense (Fig. 3g-k).

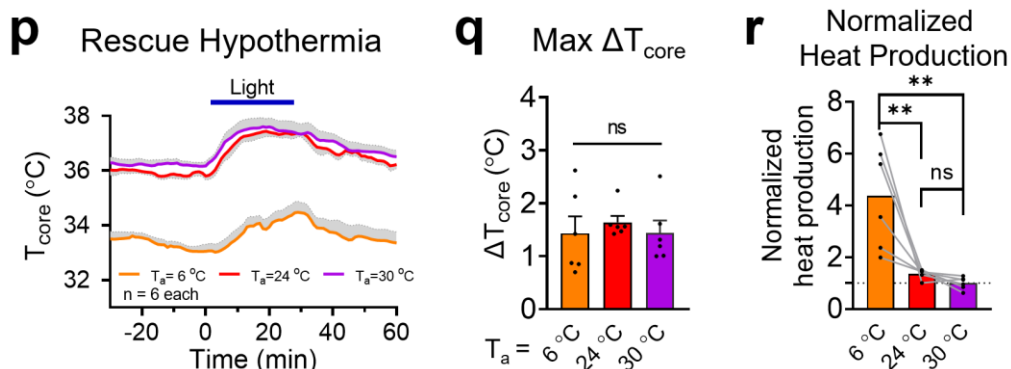

259

260 **Fig. 4** | (p-q) Changes in  $T_{core}$  after photoactivation of the LPB<sup>Vglut2</sup>→DMH  
261 projection under different  $T_a$  (6, 24, 30°C; n = 6 mice each) (p). The maximum  
262  $\Delta T_{core}$  during photoactivation was quantified in (q). (r) Normalized heat  
263 production of mice after photoactivation of the LPB<sup>Vglut2</sup>→DMH projection under  
264 different  $T_a$  as indicated. Heat production was normalized by the formula ( $T_{core}$   
265  $-T_a$ ) /  $\Delta T_{core}$  as reported.

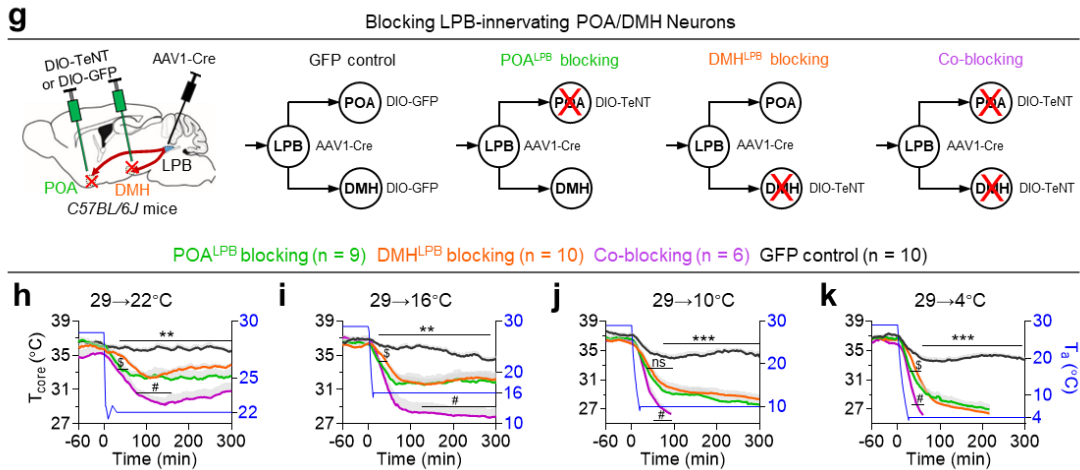

266

267 **Fig. 3 |** (g) Blocking LPB-innervating POA/DMH neurons or both using TeNT.  
 268 The detailed scheme is shown in Extended Data Fig. 5a. Briefly, anterograde  
 269 transsynaptic Cre carried by AAV1 (AAV1-hSyn-Cre) was injected in the LPB to  
 270 drive expression of Cre-dependent TeNT injected in either the POA (POA<sup>LPB</sup>  
 271 blocking), or the DMH (DMH<sup>LPB</sup> blocking), or both (co-blocking). Cre-dependent  
 272 GFP co-injected in both the POA and DMH was used as the control (GFP  
 273 control). (h-k)  $T_{core}$  changes in response to a series of cold exposures, namely  
 274 29→22°C (h), 29→16°C (i), 29→10°C (j), and 29→4°C (k), after blocking  
 275 POA<sup>LPB</sup>, DMH<sup>LPB</sup>, or both types of neurons (n = 10 mice for GFP and DMH<sup>LPB</sup>  
 276 blocking group; n = 9 mice for POA<sup>LPB</sup> blocking group; n = 6 mice for the co-  
 277 blocking group). \*, DMH<sup>LPB</sup> blocking vs. GFP; \$, DMH<sup>LPB</sup> vs. POA<sup>LPB</sup> blocking;  
 278 #, POA<sup>LPB</sup> vs. co-blocking.

279

280 For the second question regarding the relationship between neurons in DMH  
 281 and MnPO/VMPO that received inputs from LPB. As summarized by Kazuhiro  
 282 (12) (Cited Fig. 4), LPB-innervating MnPO/VMPO neurons contain separate  
 283 subgroups of neurons for either cold or warm defenses and therefore are  
 284 responsible for both cold and warm defenses. In contrast, LPB-innervating  
 285 DMH neurons are only responsible for cold defense. We also verified this  
 286 conclusion by blocking MnPO/VMPO-projecting or DMH-projecting LPB<sup>Vglut2</sup>  
 287 neurons (Reviewer only Fig. 2a-b). Both blockings impaired cold defenses but  
 288 only blocking MnPO/VMPO-projecting LPB<sup>Vglut2</sup> neurons impaired warm  
 289 defense (Reviewer only Fig. 2c-d). Taken together, LPB-innervating  
 290 MnPO/VMPO and DMH neurons function in parallel in cold defense. In contrast,  
 291 according to previous numerous literature (12-14), DMH neurons, including

292 LPB-innervating DMH neurons, are expected to act downstream of LPB-  
 293 innervating MnPO/VMPO neurons to form a feed-forward pathway in warm  
 294 defense.

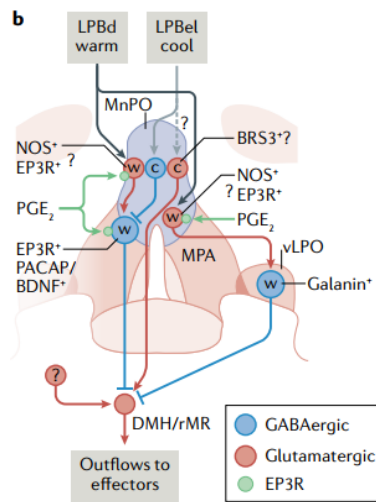

295  
 296 **Cited Fig. 4 | (b) A model of the POA local circuit that controls effector**  
 297 **responses to thermal and infection stresses.** Cutaneous warm-sensory  
 298 inputs from the dorsal part of the lateral parabrachial nucleus (LPBd) activate  
 299 glutamatergic interneurons in the MnPO (blue-shaded area), which then  
 300 activate GABAergic projection neurons in the MPA, the MnPO and the ventral  
 301 part of the lateral preoptic area (vLPO) (red shaded areas). These projection  
 302 neurons inhibit excitatory neurons in the dorsomedial hypothalamus (DMH) and  
 303 rostral medullary raphe region (rMR) that otherwise drive cold-defensive  
 304 responses. (Cited from (12))

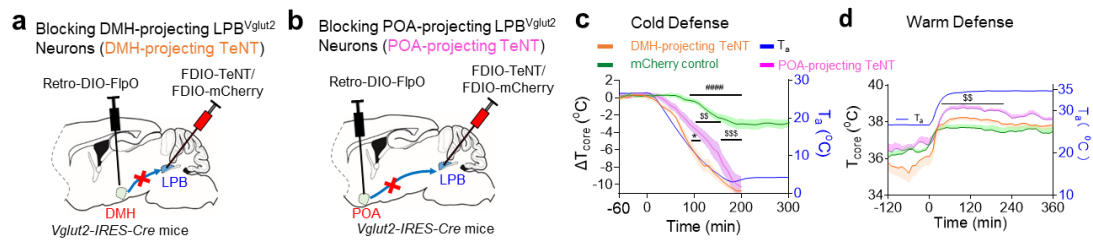

305  
 306 **Reviewer only Fig. 2 | (a) Scheme for blocking DMH-projecting LPB<sup>Vglut2</sup>**  
 307 **neurons.** For blocking DMH-projecting LPB<sup>Vglut2</sup> neurons, retrograde AAVs  
 308 carrying Cre-dependent FlpO were injected in the DMH, which drove the  
 309 expression of FlpO-dependent TeNT in the LPB. (b) Scheme for blocking POA-  
 310 projecting LPB<sup>Vglut2</sup> neurons. For blocking POA-projecting LPB<sup>Vglut2</sup> neurons,  
 311 retrograde AAVs carrying Cre-dependent FlpO were injected in the POA, which  
 312 drove the expression of FlpO-dependent TeNT in the LPB. (c-d) Changes in  
 313 T<sub>core</sub> after blocking of DMH-projecting LPB<sup>Vglut2</sup> or POA-projecting LPB<sup>Vglut2</sup>



314 neurons during the cold (c) or warm (d) challenge. #, mCherry vs DMH-  
315 projecting TeNT; \$, mCherry vs POA-projecting TeNT; \*, DMH-projecting TeNT  
316 vs POA-projecting TeNT.

317

318 2. Similarly, why both  $DMH^{Vglut2}$  vs.  $DMH^{Vgat}$  are required for cold induced  
319 defensive behavior?

320 R: In our previous publication in *PNAS* (15), we clearly demonstrated that both  
321  $DMH^{Vglut2}$  vs.  $DMH^{Vgat}$  are important for cold defense since they both could  
322 bidirectionally control  $T_{core}$  upon activation/inhibition. By comparing the whole-  
323 brain projection data of  $DMH^{Vglut2/Vgat}$  neurons from the Allen Brain Institute, we  
324 found that  $DMH^{Vgat}$  neurons mainly project to the POA with few projections to  
325 RPa (rMR), while  $DMH^{Vglut2}$  neurons send significantly more projections to RPa  
326 than  $DMH^{Vgat}$  neurons (Cited Fig. 5). Therefore, we proposed that  $DMH^{Vglut2}$   
327 neurons primarily provide excitatory input to premotor neurons in the RPa to  
328 stimulate thermogenesis, while  $DMH^{Vgat}$  neurons may mainly suppress POA  
329 hypothalamic neurons to inhibit heat loss. Working together, these two neuron  
330 types could maximize heat production to defend against cold. In line with the  
331 evidence, our preliminary data suggest that the projection from the  $DMH^{Vgat}$  to  
332 the vLPO indeed could increase  $T_{core}$  (Reviewer only Fig. 3)

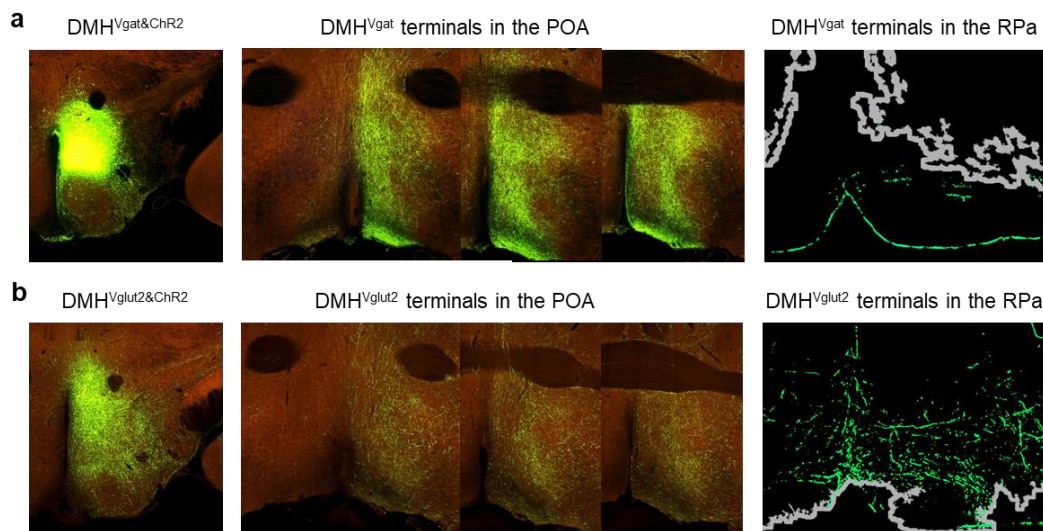

333

334 Cited Fig. 5 | The terminal distribution of  $DMH^{Vgat}$  (a) and  $DMH^{Vglut2}$  neurons (b)  
335 in the POA and RPa (downloaded from Allen brain institute).

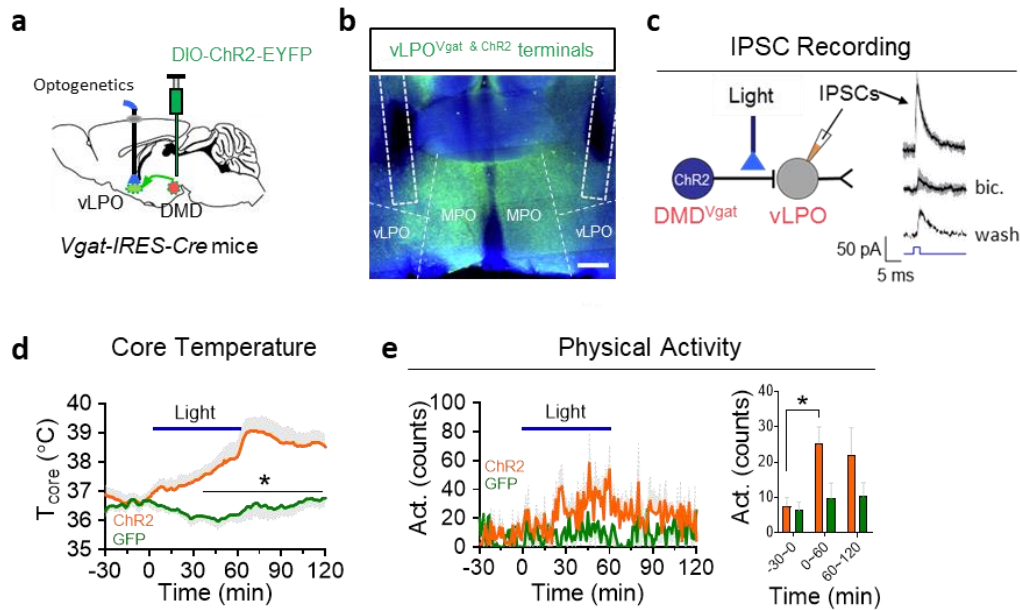

336

337 **Reviewer only Fig. 3** | (a) Scheme for photoactivation of neural terminals of  
 338 DMH<sup>Vgat</sup> neurons in the vLPO using ChR2. (b) Representative expression of  
 339 ChR2 terminals from DMH<sup>Vgat</sup> neurons in the vLPO. (c) ChR2-expressing  
 340 terminals were activated with a 2-ms blue light to elicit inhibitory postsynaptic  
 341 currents (IPSCs) in vLPO neurons. IPSCs were blocked by bicuculline (bic.)  
 342 and recovered partially after washing. Shadowed areas were SD. (d-e)  
 343 Changes of  $T_{\text{core}}$  (d), and physical activity (e) after neural terminals of DMH<sup>Vgat</sup>  
 344 neurons in the vLPO (ChR2, n = 6 mice; GFP, n = 4). Light pattern: 473 nm, 6  
 345 mW, 20 Hz, 10 ms, 2-s on 2-s off, 60 min.

346

347 3. In Fig.5F, why body weight no longer increases after light stimulation start in  
 348 control mice? could it be the stress caused by long term light stimulation? why  
 349 not using chemogenetic stimulation which could be less stressful?

350 **R:** We noticed that the stress caused by fiber attachment during long-term light  
 351 stimulation might curb the body weight gains. Therefore, we wrote in **line 412-**  
 352 **415:** "Although the photostimulation procedure itself appeared to curb weight  
 353 gains in control mice, photoactivation of the LPB<sup>Vglut2</sup>→DMH projection further  
 354 reduced body weight without affecting cumulative food intake (**Fig. 5f-h**).". As  
 355 suggested by this reviewer, the chemogenetics could be suitable for long-term  
 356 stimulation in soma stimulations. However, using chemogenetic to activate the  
 357 terminal requires repetitive injection of CNO to the DMH through a cannula,  
 358 which might also cause stress. Therefore, we did not adopt the chemogenetic  
 359 approaches. We hope this reviewer would agree with us and understand the  
 360 limitations of both approaches.

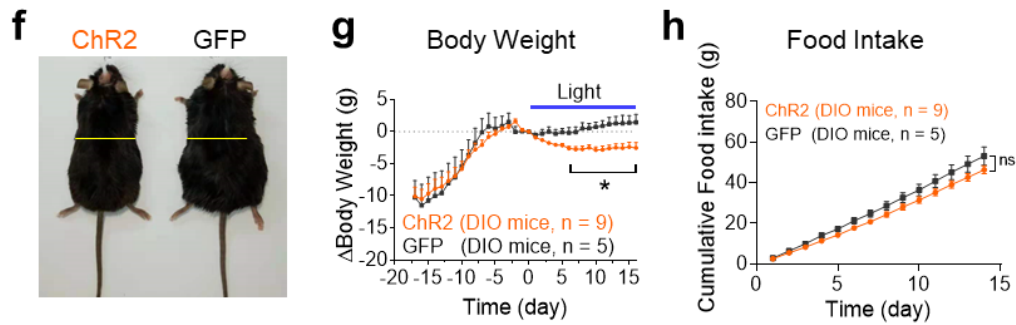

361

362 **Fig. 5** | (f) Mice after two weeks of photoactivation (left, ChR2 group; right, GFP  
 363 group). (g-h) Changes in body weight (g) and cumulative food intake (h) during  
 364 two weeks of photoactivation (ChR2, n = 9 mice; GFP, n = 5 mice, a total of 10  
 365 mice for ChR2 and 6 mice for GFP were injected, 1 mouse for ChR2 and 1  
 366 mouse for GFP were excluded from the final analysis due to death). The light  
 367 pattern is shown in (d).

368

369 4. Because LPB<sup>SST</sup> neurons also project to MPO? What is the percentage of  
 370 LPB<sup>SST</sup> neurons → MPO neurons are Fos<sup>+</sup> after cold stimulus?

371 R: Thanks for this careful notice. As shown below, about 20 percent of POA-  
 372 projecting LPB<sup>SST</sup> neurons are Fos<sup>+</sup> after cold stimulus (**Extended Data Fig.**  
 373 **9b**). In contrast, more (~40%, **Extended Data Fig. 9a**) POA-projecting LPB<sup>SST</sup>  
 374 neurons are activated after a heat stimulus. Nevertheless, we photoactivated  
 375 the LPB<sup>SST</sup> → POA projections and found a hypothermia phenotype (**Extended**  
 376 **Data Fig. 9d**). These data resembled the photoactivation phenotypes seen  
 377 after bulk activation of LPB<sup>Vglut2</sup> → POA projections, which causes hypothermia  
 378 only. We added this data to **Extended Data Fig. 9a-d**.

379

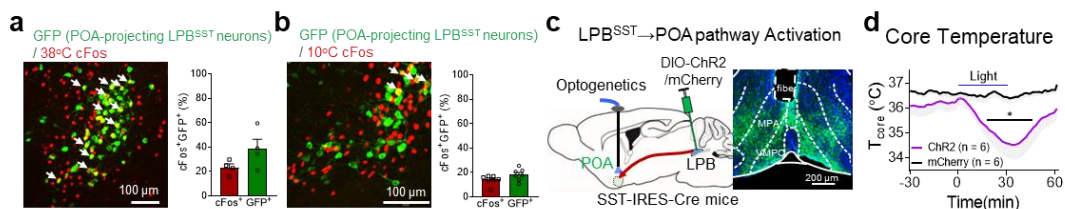

380 **Extended Data Fig. 9** | (a-b) Overlap between POA-projecting LPB<sup>SST</sup> neurons  
 381 and heat-induced cFos (a) or cold-induced cFos (b) (n = 3 mice each). To label  
 382 POA-projecting LPB<sup>SST</sup> neurons, we injected retrograde AAVs carrying Cre-  
 383 dependent GFPL10 (AAV-Retro-CAG-Flex-GFPL10) in the VMPO of SST-  
 384 IRES-Cre mice, which drove the expression of GFPL10 in the LPB. Merged

385 cells were indicated by white arrows. (c) Design to activate the LPB<sup>SST</sup>→POA  
386 projection via photostimulating of LPB<sup>SST</sup> & ChR2 terminals in the VMPO. The  
387 representative expression of ChR2-eYFP in the POA is shown in right. (d)  
388 Changes in T<sub>core</sub> after photoactivation of the LPB<sup>SST</sup>→POA projection. (n = 6  
389 mice). Light pattern: 473 nm, 6 mW, 10 Hz, 10 ms, 2-s on followed by 2-s off,  
390 with the cycles repeating for 30 min.

391

392 5. There are so many markers for the DMH-projecting LPB<sup>Vglut2</sup> neurons? are  
393 these neurons co-label same neurons or they label different population of  
394 neurons? this question is important because LPB<sup>SST</sup> neurons only represent  
395 less than 20% of Fos<sup>+</sup> neurons after cold stimulus.

396 R: We thank this reviewer for noticing many “markers” for the DMH-projecting  
397 LPB<sup>Vglut2</sup> neurons from our Retro-TRAP sequencing data. We actually studied  
398 several of them, including n4bp2os, Gal, SST, TH, CCK, and Pdyn. Since a Cre  
399 strain was not available to label n4bp2os+ neurons, we did not further  
400 investigate this marker. We reported previously that there were few Gal-Cre<sup>+</sup>  
401 and TH<sup>+</sup> neurons in the LPB (**Cited Fig. 6C, D**) (3). Instead, we found a cluster  
402 of Gal-Cre<sup>+</sup> neurons in the laterodorsal tegmental nucleus and the locus  
403 coeruleus (**Cited Fig. 6C**), and a cluster of TH<sup>+</sup> neurons in the locus coeruleus  
404 (**Cited Fig. 6D**). Their enrichment might presumably be due to tissue  
405 contamination from nearby areas. For CCK and Pdyn, we reported before that  
406 there were no changes in T<sub>core</sub> after activation of LPB<sup>Pdyn/CCK</sup> terminals in the  
407 DMH (**Cited Fig. 6 E, F and H, I**) (3).

408 Nevertheless, we agree with the reviewer that there should exist other  
409 important markers for cold defense in the LPB-DMH pathway. Therefore, we  
410 wrote in **line 633-638**: “We showed that the LPB<sup>SST</sup>→DMH<sup>LepR</sup> pathway  
411 governs iBAT thermogenesis, suggesting a genetically defined projection  
412 controls specific cold defense activities. We reasonably speculate that other  
413 cold defense activities, including heart rate and muscle shivering, are also  
414 controlled by genetically defined neural projections.”. Significant effort was  
415 needed to identify other genetic markers for cold defense in the LPB-DMH  
416 pathway.

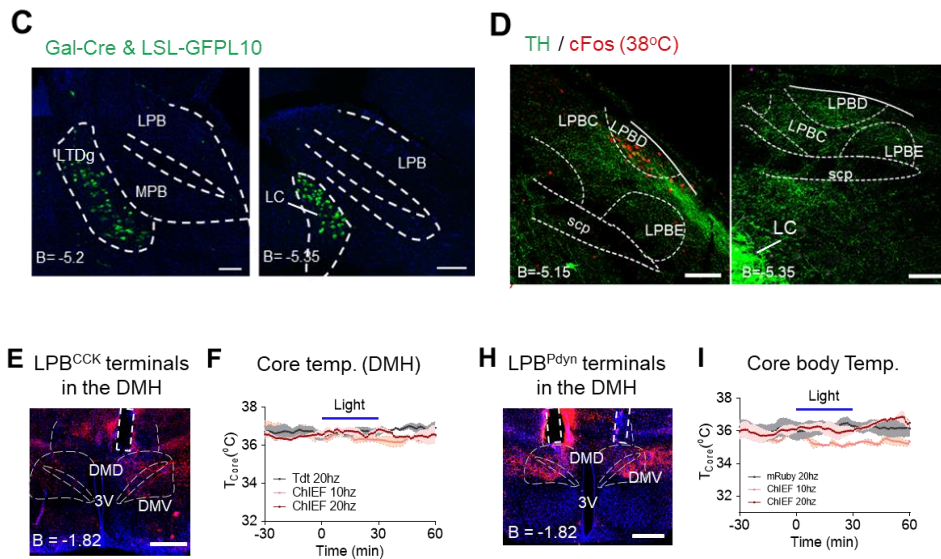

417

418

419 **Cited Fig. 6** | (C) GFP expression of Galanin-Cre & LSL-GFPL10 mice in the  
 420 LPB, LDTg and LC. (D) The staining of warm-induced cFos and TH (tyrosine  
 421 hydroxylase) in the LPB showed nearly no TH<sup>+</sup> soma in the LPB. (E) Expression  
 422 of ChIEF from LPB<sup>CCK</sup> neural terminals in the DMH. (F) Changes of T<sub>core</sub> after  
 423 photoactivation of LPB<sup>CCK</sup> neural terminals in the DMH. (H) Expression of  
 424 ChIEF from LPB<sup>Pdyn</sup> neural terminals in the DMH. (I) Changes of T<sub>core</sub> after  
 425 photoactivation of LPB<sup>Pdyn</sup> neural terminals in the DMH.

426

427 6. Are LPB is the only input to drive cold response in the DMH?

428 **R:** There are other inputs to the DMH besides the LPB. The POA has long been  
 429 considered the primary upstream region for driving cold responses (12, 13, 16).  
 430 Recent studies have identified POA<sup>BRS3</sup> neurons that can drive cold response  
 431 through the DMH (**Cited Fig. 7B**) (17). Additionally, the DP/DTT provides input  
 432 to the DMH to drive thermogenic response during psychological stress (**Cited**  
 433 **Fig. 8F**) (18). However, further studies are required to investigate whether the  
 434 DP/DTT can also be activated by cold stress. Whether these different inputs  
 435 act on the same or different DMH neural subtypes is unclear. Yet, based on the  
 436 tracing studies, DMH<sup>BRS3</sup> received much more input from the POA than from the  
 437 LPB (**Cited Fig. 9**, (14)). Thus, it is reasonable to speculate that different inputs  
 438 may act on slightly different DMH neural subtypes to promote thermogenesis.

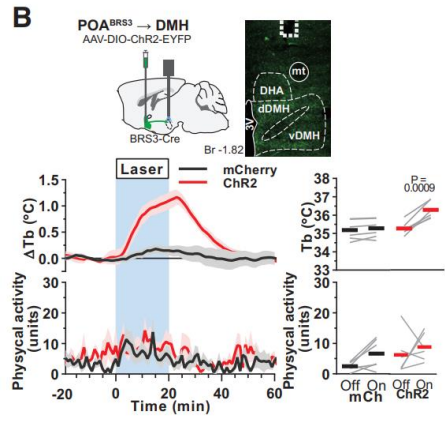

439

440 **Cited Fig. 7** | (B) Optogenetic stimulation of POA<sup>brs3</sup>→DMH axons increases  
 441 T<sub>core</sub>.

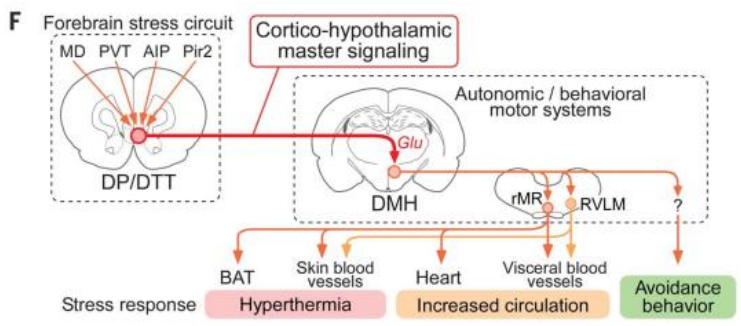

442

443 **Cited Fig. 8** | (F) The DP/DTT integrates signals from multiple forebrain regions  
 444 processing stress and emotion and then provides a glutamatergic (Glu) master  
 445 signal to the DMH to excite neuronal groups controlling different effectors.

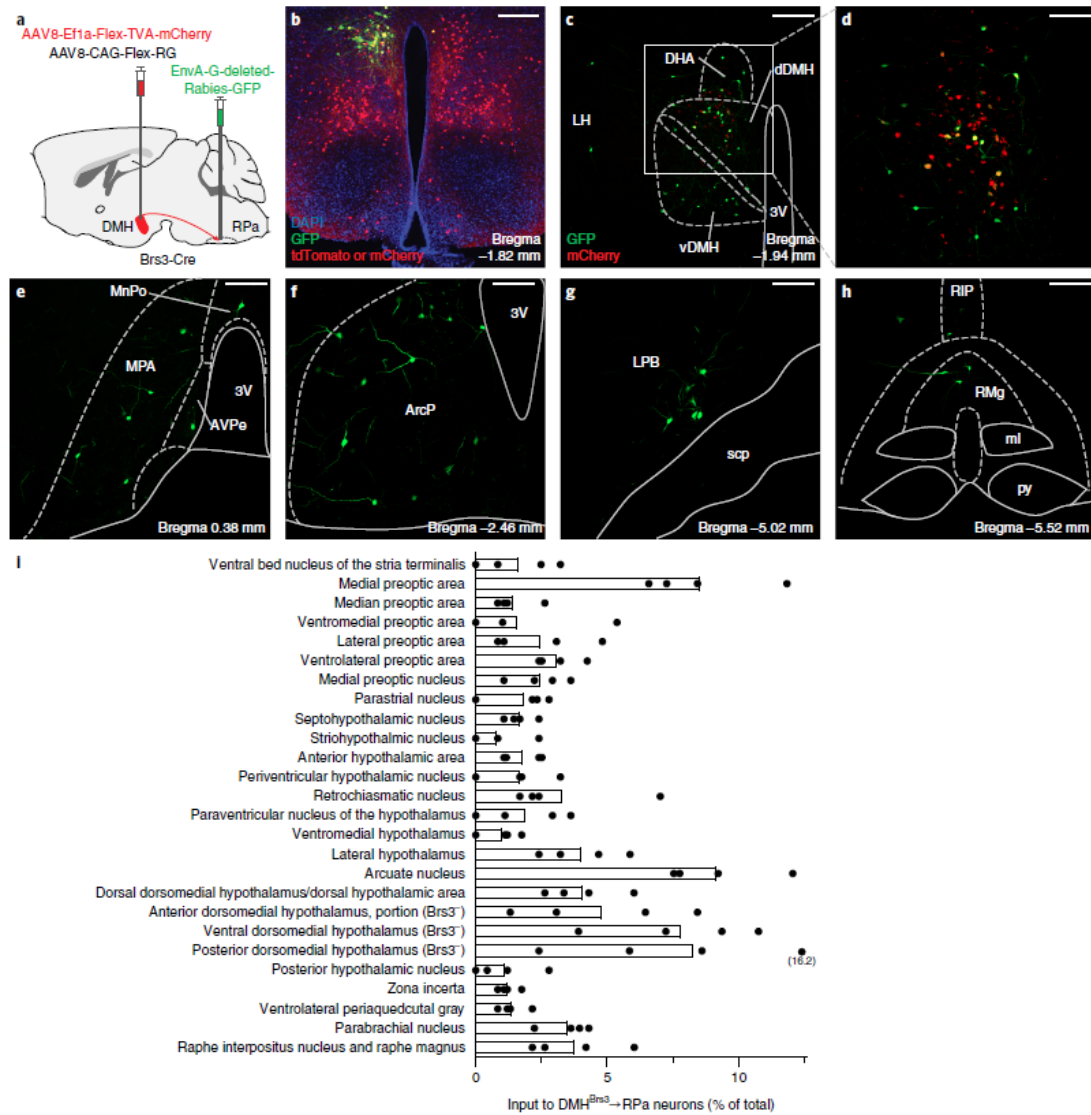

446

447 **Cited Fig. 9 | DMH<sup>Brs3</sup>→RPa neurons receive input from POA and other**  
 448 **nuclei.** (a) Schematic of projection-specific rabies tracing. b, Brs3-Cre; Ai14  
 449 mice injected with AAV-DIO-TVA-mCherry (TVA, avian tumor virus receptor A)  
 450 in the DMH and EnvA-G-deleted-Rabies-GFP in the RPa, showing the dDMH–  
 451 DHA localization of DMH<sup>Brs3</sup>→ RPa neurons. (c–i) Brs3-Cre mice were injected  
 452 with Flex-TVA-mCherry and Flex-RG (RG, rabies glycoprotein) viruses in the  
 453 DMH and EnvA-G-deleted-Rabies-GFP in the RPa. (c,d) DMH showing  
 454 DMH<sup>Brs3</sup>→ RPa starter neurons expressing TVA-mCherry and GFP. (d) Higher  
 455 magnification of inset. (e–h) Examples of regions with higher numbers of input  
 456 neurons, which express only GFP. (i) Areas with input neurons to DMH<sup>Brs3</sup>→  
 457 RPa neurons, percentage of total.

458

459 Minor point:

460 1. Because the limited retrograde efficiency of retrograde tracing virus, the  
461 conclusion of '20% projected to both regions' is likely underestimate.

462 R: We express our gratitude to the reviewer for highlighting the limitations of  
463 our study with regard to retrograde efficiency, which we acknowledge.  
464 Accordingly, we have added a statement in **lines 1151-1152**: "It is noteworthy  
465 that this percentage might be underestimated due to the limited retrograde  
466 efficiency."

467

468 2. Using terminal fiber photometry to study the kinetics of temperature response  
469 is not very meaningful, as they could be strongly modulated by varies  
470 autoreceptors located in the terminal.

471 R: We appreciate the reviewer's valuable information. We would also like to  
472 note that we used retrograde labeling with GCaMP6s to record projection-  
473 specific soma calcium responses (**Fig. 2p-t**), which provides complementary  
474 data to the terminal recording data.

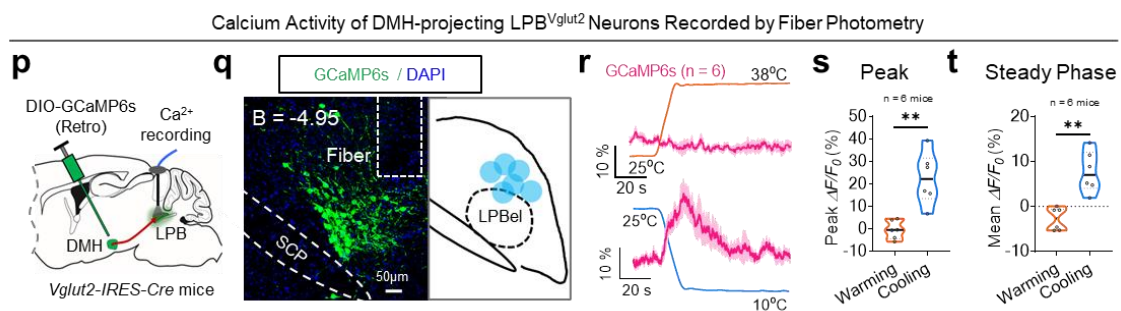

475

476 **Fig. 2** | (p-q) Recording from DMH-projecting LPB<sup>Vglut2</sup> neurons (p) and  
477 representative expression of GCaMP6s (left) and summary of fiber tracts  
478 (shown as blue dots, right) (q). Retrograde traveling AAV-Retro-hSyn-Flex-  
479 GCaMP6s were injected in the DMH of Vglut2-Cre mice, which traveled to the  
480 LPB to drive GCaMP6s expression in the soma of LPB<sup>Vglut2</sup> neurons. (r) Calcium  
481 dynamics of DMH-projecting LPB<sup>Vglut2</sup> neurons in response to floor warming (25  
482 →38°C) or cooling (25→10°C) (n = 6 mice). (s) Peak  $\Delta F/F_0$  values during floor  
483 warming or cooling (n = 6 mice, average  $\Delta F/F_0$  of 5 trials per mouse). (t) Mean  
484  $\Delta F/F_0$  values during the steady phase after floor warming or cooling (n = 6 mice,  
485 average  $\Delta F/F_0$  of 5 trials per mouse).

486

487



488 **Reviewer #3 (Remarks to the Author):**

489

490 In this paper, the authors examine the hypothesis that cold responsive neurons  
491 in the lateral parabrachial nucleus (LPB) project to the dorsomedial nucleus of  
492 the hypothalamus, where they activate cold-defense pathways. I typically begin  
493 a review with a summary of all of the experiments that were done, however,  
494 that is nearly impossible for this paper. It is extremely long (over 7,000 words)  
495 and gives the results of over 40 experiments, many of which are very  
496 complicated. In most cases, there is no n given (in others where it is given, it is  
497 often very low numbers, such as 3 animals), and in no case is there given  
498 sufficient detail on injection placement (some of these injections have to miss  
499 their targets, but there is no information on how many total animals were done,  
500 how they picked the small number of animals they present, or what the  
501 anatomical controls, i.e., missed injections, showed), controls are not done for  
502 many key experiments, and it is rare to find any statistical analysis.

503 R: We appreciate the reviewer for bringing up these points here and I believed  
504 these points have been brought up by this reviewer when we submitted to  
505 another journal. We actually have made significant efforts to reduce the  
506 complexity of the manuscript before the submission here. Now, we have made  
507 additional efforts to improve the clarity of the manuscript and included the  
508 technical and statistical details mentioned above.

509 We have listed numbers in the figure or plotted data in dots to show  
510 numbers and had previously summarized **all numbers and detailed statistics**  
511 **in Extended Data Table 2**. Now, we clearly marked the numbers on the figures  
512 and described the statistics clearly in the figure legends as well. We used a  
513 minimum of n = 6 mice for behavioral testing, n = 3 mice for staining analysis,  
514 and n = 4 for EMG recording. After behavioral tests were finished, mice were  
515 perfused to check the virus expression and fiber insertion. Data from mice that  
516 showed little or no viral expression or had a fiber insertion that missed the target  
517 (often 0-20%) were excluded from the analysis (please see **Extended Data Fig.**  
518 **6, Reviewer only Fig. 4** and methods **lines 69-71** for more information).

**a**

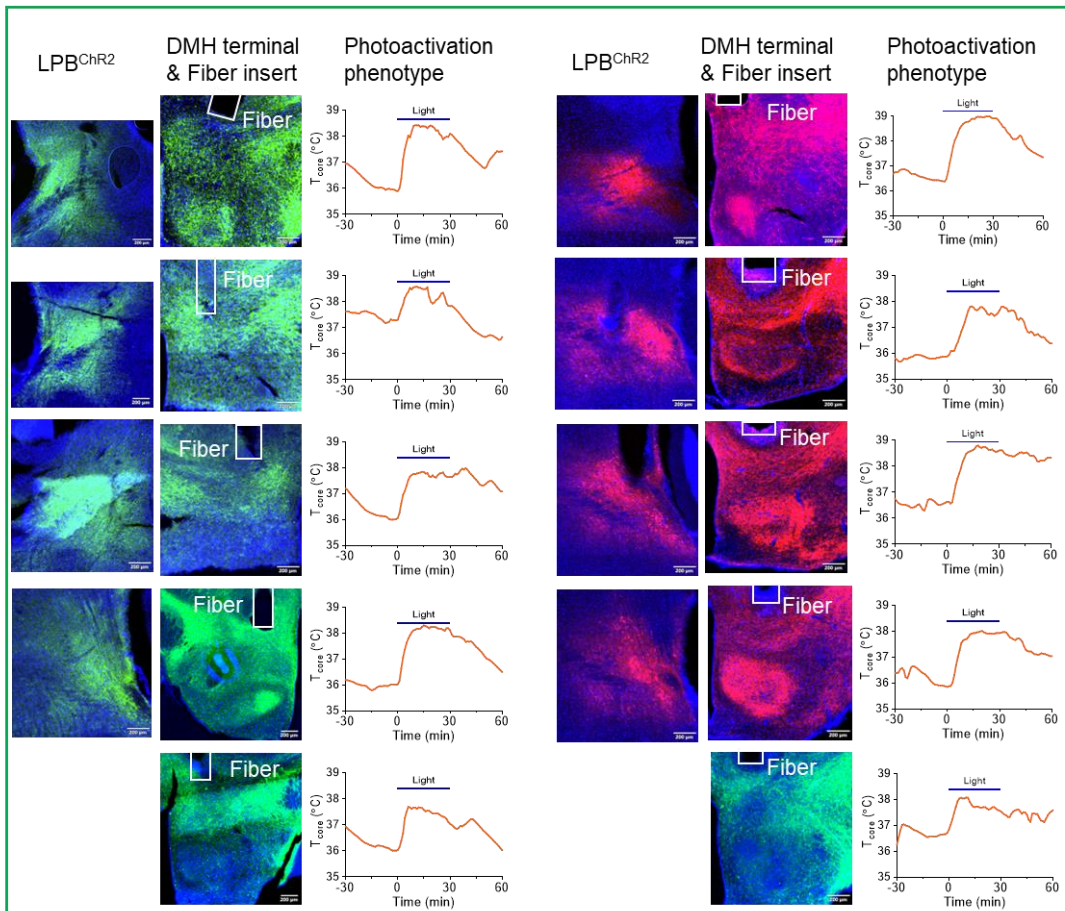

**b**

**One mouse that missed target of photoactivation**

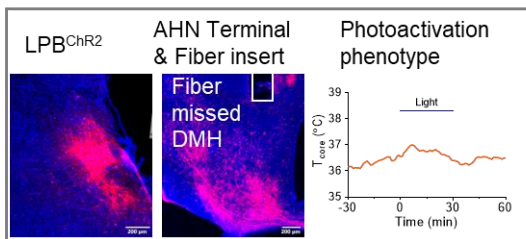

519

520 **Extended Data Fig. 6** | (a) Representative images demonstrating the  
521 expression of ChR2 in LPB<sup>Vglut2</sup> neurons, fiber insert positions and resulting  
522 T<sub>core</sub> changes after photoactivation LPB<sup>Vglut2</sup>→DMH that hit the target. (b) Data  
523 from one mouse exhibiting missed fiber insert position and T<sub>core</sub> changes  
524 following photoactivation. AHN, anterior hypothalamic nucleus.

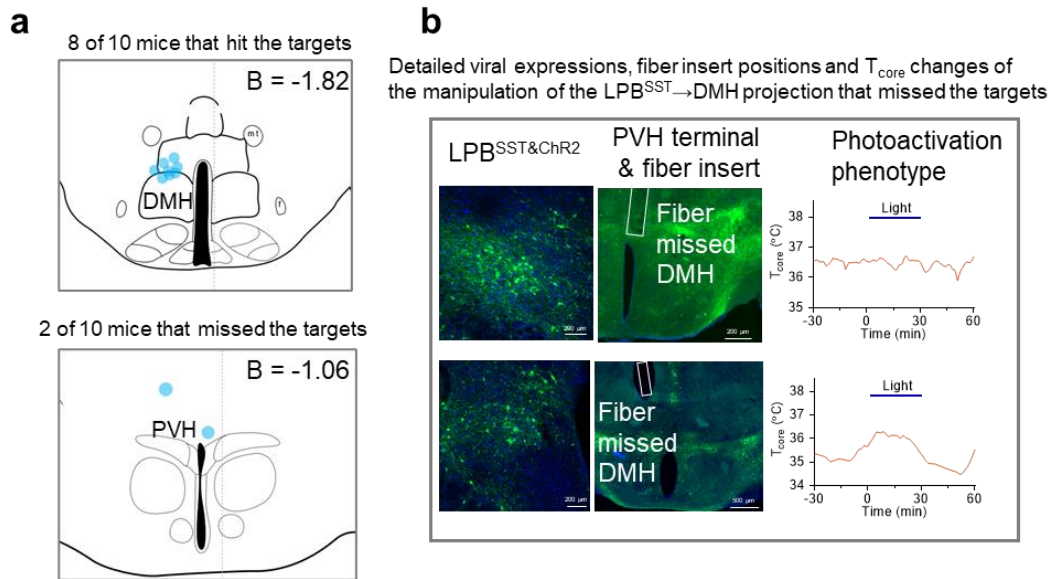

525

526 **Reviewer only Fig. 4** | (a) Summary of fiber tracts that hit the target and miss  
 527 target (shown as blue dots) of LPB<sup>SST</sup>→DMH. (b) Data from two mice exhibiting  
 528 miss fiber insert positions and  $T_{core}$  changes following photoactivation. PVH,  
 529 Paraventricular hypothalamic nucleus.

530 For viral expression, besides showing representative virus expression  
 531 images and optical fiber locations, we included the anatomical map of viral  
 532 expression and optical fiber location maps (Fig. 1d, 2b, 2q, 4b, 7b, and so on).  
 533 For example, we provided the anatomy map of retrograde tracers injected in  
 534 the POA and the DMH (Extended Data Fig. 2a). We also provided the  
 535 expression map of these retrograde tracers in the LPB (Extended Data Fig.  
 536 2b) and Heatmaps of TeNT expression and fiber tracts (shown as green dots)  
 537 at different Bregma sites from key experimental mice (Extended Data Fig. 5b  
 538 and Extended Data Fig. 7n).

539 As for the concern of control experiments, we indeed provided proper  
 540 controls for all the experiments. The design of this study has been recognized  
 541 by reviewers #1 and #2. “The design of this study is straightforward, and the  
 542 results are novel, exciting, and convincing” by reviewer #1 and “The battery of  
 543 viral tools used in this manuscript is very impressive and the author provided  
 544 solid data to ...” by reviewer #2.

545 Together, we thank this reviewer for witnessing the improvement of this  
 546 manuscript and hope this reviewer would appreciate our efforts made to  
 547 address the issues.

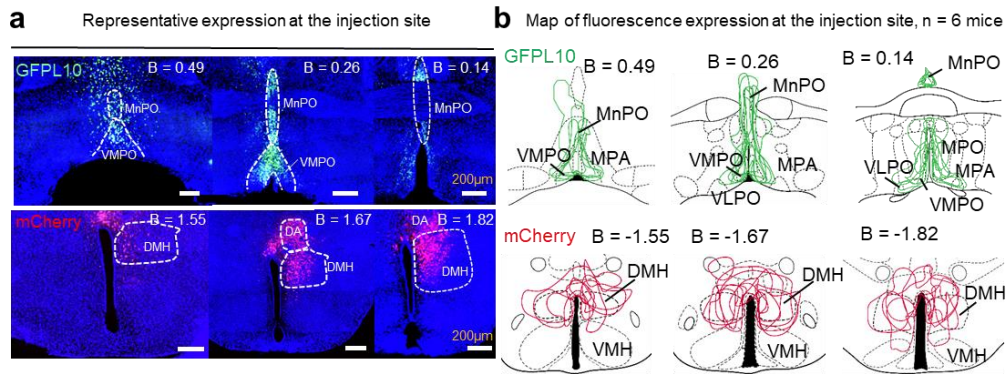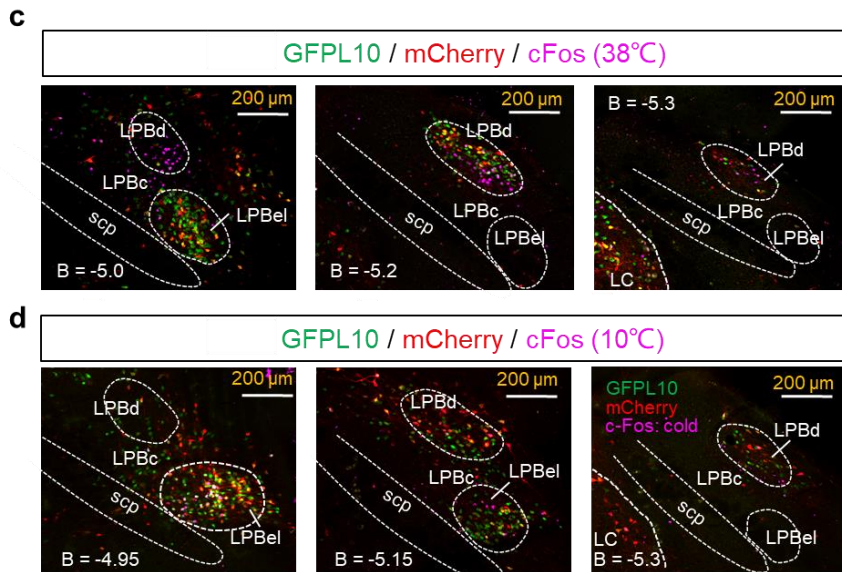

548

549 **Extended Data Fig. 2 | Mapping the collateral projections of LPB<sup>Vglut2</sup>**

550 neurons to the POA (MnPO & VMPO) and the DMH.

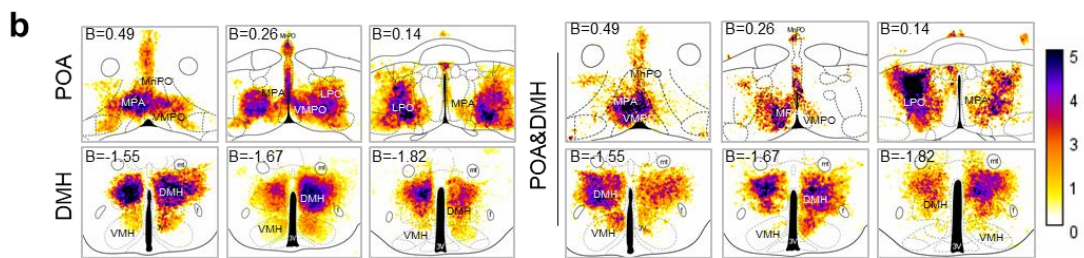

551

552 **Extended Data Fig. 5 | (b) Heatmaps of TeNT expression after blocking LPB-**

553 innervating POA or DMH neurons.

n

Heatmaps of TeNT expression and fiber tracts of all blocking mice above

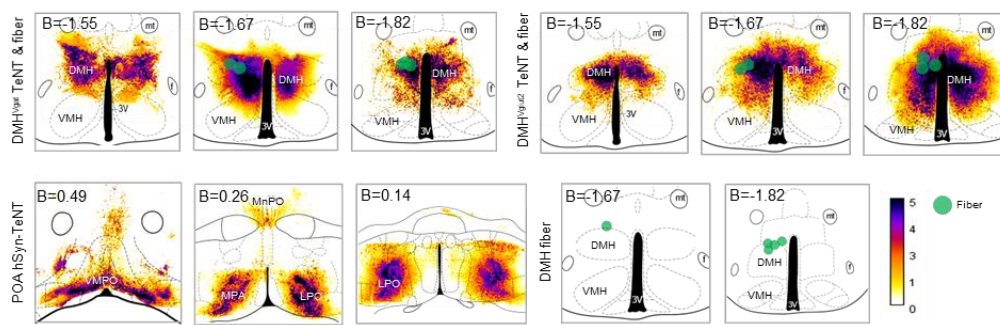

554

555 **Extended Data Fig. 7 |** (n) Heatmaps of TeNT expression and fiber tract ends  
556 (shown as green dots) at different Bregma sites from all experimental mice.  
557 DMH<sup>Vglut2</sup> blocking, n = 9 mice; DMH<sup>Vgat</sup> blocking, n = 7 mice; POA blocking, n  
558 = 7 mice. The relative scale for the expression intensity (measured by  
559 fluorescence intensity) was shown on the right.

560

561 Having said that, I think this is an interesting story, which would be of interest  
562 to many scientists who work on thermoregulation. But it is impossible to  
563 evaluate the work critically in its current state because so much of the  
564 necessary information on the rigor of the experiments is missing. I would  
565 strongly encourage the authors, to include complete information for each  
566 experiment.

567 **R:** We express our gratitude for the reviewer's interest in our work. We have  
568 taken the reviewer's feedback into careful consideration and have made  
569 significant modifications to the manuscript, including adding detailed  
570 descriptions of experiments in legends, the methods and results sections.  
571 Specifically, we have incorporated additional details on how we recorded body  
572 temperature and BAT temperatures, provided proper descriptions of controls,  
573 and included maps of injection sites. Moreover, based on feedback from other  
574 reviewers during the previous review process, we have reorganized the  
575 manuscript and eliminated extraneous details to enhance its readability.

576

577 This would include the power analysis that should have been done before the  
578 studies were started indicating the number of animals that should be in each  
579 group; the actual numbers of animals used in each experiment; how they chose  
580 which ones to present in the paper; details about the actual results in the

581 animals that are included and the ones that are not included, as well as controls;  
582 how they did the statistics; and what the statistical findings were. This is  
583 particularly important for experiments involving stereotaxic injections, some of  
584 which will miss their intended target. How were those cases identified? They  
585 should be analyzed by someone who does not know the physiological results.  
586 The ones that hit the target should be analyzed separately from those that  
587 missed the target, which then serve as anatomical controls. But you need to  
588 present heat maps showing the actual injection placements in both sets of  
589 animals.

590 R: Again, thank you for bringing up these concerns once again. We would like  
591 to reiterate that we have taken the necessary steps to address these issues by  
592 including the relevant data and statistics in the manuscript. Specifically, we  
593 have listed the numbers in the figures and presented the data in dots to provide  
594 clarity. We have also provided a comprehensive summary of **all numbers and**  
595 **detailed statistics** in **Extended Data Table 2** and highlighted the figures'  
596 details and statistics in the figure legends. Additionally, we ensured that the  
597 experiments were conducted with a minimum of  $n = 6$  mice for behavioral  
598 testing,  $n = 3$  mice for staining analysis, and  $n = 4$  for EMG recording. After the  
599 completion of behavioral tests, we conducted perfusions to check for virus  
600 expression and fiber insertion, and data from mice that showed little or no viral  
601 expression or had a fiber insertion that missed the target (often 0-20%) were  
602 excluded from the analysis (please see **Extended Data Fig. 6, Reviewer only**  
603 **Fig. 4** and methods **lines 69-71** for more information).

604

605

## 606 **References**

- 607 1. S. Jung *et al.*, A forebrain neural substrate for behavioral thermoregulation. *Neuron*,  
608 (2021).
- 609 2. J. N. Flak *et al.*, Leptin-inhibited PBN neurons enhance responses to hypoglycemia in  
610 negative energy balance. *Nature neuroscience* **17**, 1744-1750 (2014).
- 611 3. W. Z. Yang *et al.*, Parabrachial neuron types categorically encode thermoregulation  
612 variables during heat defense. *Sci Adv* **6**, eabb9414 (2020).
- 613 4. A. J. Norris, J. R. Shaker, A. L. Cone, I. B. Ndiokho, M. R. Bruchas, Parabrachial  
614 opioidergic projections to preoptic hypothalamus mediate behavioral and physiological  
615 thermal defenses. *eLife* **10**, (2021).
- 616 5. L. Sun *et al.*, Parabrachial nucleus circuit governs neuropathic pain-like behavior.  
617 *Nature communications* **11**, 5974 (2020).

- 618 6. D. Mu *et al.*, A central neural circuit for itch sensation. *Science* **357**, 695-699 (2017).
- 619 7. J. R. Moffitt *et al.*, Molecular, spatial, and functional single-cell profiling of the  
620 hypothalamic preoptic region. *Science* **362**, (2018).
- 621 8. A. Stengel *et al.*, Central injection of the stable somatostatin analog ODT8-SST induces  
622 a somatostatin2 receptor-mediated orexigenic effect: role of neuropeptide Y and opioid  
623 signaling pathways in rats. *Endocrinology* **151**, 4224-4235 (2010).
- 624 9. L. Jansky, Neuropeptides and the Central Regulation of Body-Temperature during  
625 Fever and Hibernation. *J Therm Biol* **15**, 329-347 (1990).
- 626 10. I. Wakabayashi, Y. Tonegawa, T. Shibasaki, Hyperthermic action of somatostatin-28.  
627 *Peptides* **4**, 325-330 (1983).
- 628 11. W. G. Clark, J. M. Lipton, Brain and pituitary peptides in thermoregulation. *Pharmacol*  
629 *Ther* **22**, 249-297 (1983).
- 630 12. K. Nakamura, Y. Nakamura, N. Kataoka, A hypothalamomedullary network for  
631 physiological responses to environmental stresses. *Nature reviews. Neuroscience* **23**,  
632 35-52 (2022).
- 633 13. S. F. Morrison, K. Nakamura, Central Mechanisms for Thermoregulation. *Annual review*  
634 *of physiology* **81**, 285-308 (2019).
- 635 14. R. A. Pinol *et al.*, Brs3 neurons in the mouse dorsomedial hypothalamus regulate body  
636 temperature, energy expenditure, and heart rate, but not food intake. *Nature*  
637 *neuroscience*, (2018).
- 638 15. Z. D. Zhao *et al.*, A hypothalamic circuit that controls body temperature. *Proceedings*  
639 *of the National Academy of Sciences of the United States of America* **114**, 2042-2047  
640 (2017).
- 641 16. C. L. Tan, Z. A. Knight, Regulation of Body Temperature by the Nervous System.  
642 *Neuron* **98**, 31-48 (2018).
- 643 17. R. A. Pinol *et al.*, Preoptic BRS3 neurons increase body temperature and heart rate via  
644 multiple pathways. *Cell metabolism*, (2021).
- 645 18. N. Kataoka, Y. Shima, K. Nakajima, K. Nakamura, A central master driver of  
646 psychosocial stress responses in the rat. *Science* **367**, 1105-1112 (2020).
- 647

## REVIEWER COMMENTS

### Reviewer #1 (Remarks to the Author):

The authors have carefully addressed the critiques I commented on in the first round of reviews. This comprehensive study shows that the PBN-to-DMH work in parallel with PBN-to-POA in regulating body temperature. A large amount of data are presented. I don't have any further criticism that I want to raise. Congratulations on accomplishing such an excellent study.

### Reviewer #2 (Remarks to the Author):

We appreciate the authors carefully addressed many of our concerns. However, several important questions have not been answered.

In our major point 1, I asked 'What is the relationship between neurons in DMH and MPO that received inputs from LPB?'. The authors said that 'DMH neurons, including

LPB-innervating DMH neurons, are expected to act downstream of LPB

innervating MnPO/VMPO neurons to form a feed-forward pathway in warm defense.'. It will be great for the authors to provide some experimental results to support their claim.

In our major point 2, I asked 'why both DMHVglut2 vs. DMHVgat are required for cold induced defensive behavior?' The authors again proposed a possibility 'we proposed that DMHVglut2 neurons primarily provide excitatory input to premotor neurons in the RPa to stimulate thermogenesis, while DMHVgat neurons may mainly suppress POA hypothalamic neurons to inhibit heat loss.' but without data to support this hypothesis. Is DMHVglut2 neurons to RPa really stimulate thermogenesis?

In our major point 5, I like to see the sequencing results been validated with RNAscope staining to determine what is the best marker for the DMH-projecting LPBVglut2 neurons that is important for cold.



## REVIEWER COMMENTS

Reviewer #1 (Remarks to the Author):

The authors have carefully addressed the critiques I commented on in the first round of reviews. This comprehensive study shows that the PBN-to-DMH work in parallel with PBN-to-POA in regulating body temperature. A large amount of data are presented. I don't have any further criticism that I want to raise. Congratulations on accomplishing such an excellent study.

R: We appreciate the recognition from this reviewer.

Reviewer #2 (Remarks to the Author):

We appreciate the authors carefully addressed many of our concerns. However, several important questions have not been answered.

In our major point 1, I asked 'What is the relationship between neurons in DMH and MPO that received inputs from LPB?'. The authors said that 'DMH neurons, including LPB-innervating DMH neurons, are expected to act downstream of LPB innervating MnPO/VMPO neurons to form a feed-forward pathway in warm defense.'. It will be great for the authors to provide some experimental results to support their claim.

R: In an effort to substantiate our claims, we undertook patch-clamp electrophysiology tests. In order to ascertain whether there is LPB innervating POA neurons direct innervate LPB innervating DMH neurons, we injected AAV1-hSyn-Cre into the LPB, and AAVs carrying Cre-dependent Channelrhodopsin-2 (AAV9-hSyn-DIO-ChR2-EYFP) into the POA and Cre-dependent mCherry (AAV9-DIO-mCherry) into the DMH of C57BL/6J mice. Light-induced excitatory postsynaptic currents (EPSCs) of DMH neurons were recorded through patch-clamp while photostimulating ChR2-expressing neural terminals in the DMH projected from LPB innervating POA neurons (**Reviewer only Fig. 1a**). Light stimulations faithfully induced EPSCs, which was found within the range of a monosynaptic connection (**Reviewer only Fig. 1b-c**). Around 15% of the recorded DMH neurons (3 of 20 neurons selected at random) exhibited EPSCs in response to light stimulations (**Reviewer only Fig. 1d**). These data show that the LPB-innervating DMH neurons receive inputs from the LPB-innervating POA neurons, suggesting that LPB-innervating DMH neurons might act downstream of LPB-innervating POA neurons to form a feed-forward pathway.

We did not directly test whether this pathway is involved in feed-forward warm defense since it requires tons of evidence to resolve the complications. Originally, there are many evidences showing a GABAergic POA-DMH projection to inhibit thermogenesis (1-3). At the same time, more evidences point out that glutamatergic POA-DMH projection may help to reduce  $T_{core}$ . For example, most BDNF neurons are glutamatergic and projects to DMH (1, 4). Glutamatergic QRFP neurons rely on DMH neurons to induce torpor (5). Therefore, given these complications, although we believe that LPB-innervating DMH neurons might act downstream of LPB-innervating POA neurons to control warm defense, it is beyond the scope of the current study. We hope the reviewer will understand the situation. Therefore, we did not include the data in the manuscript and would like to perform more careful analysis on this issue in the future.

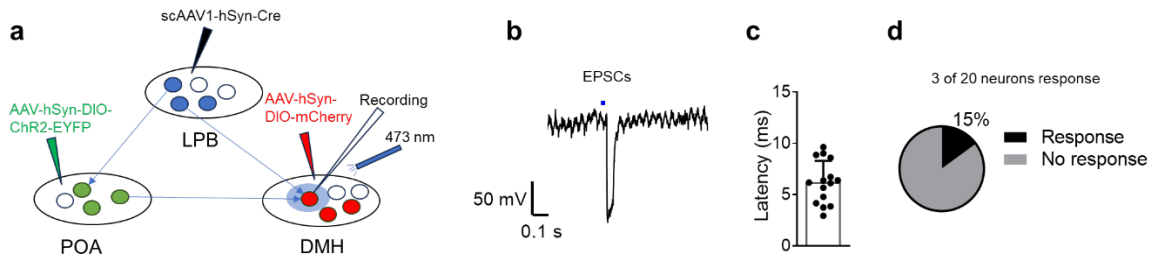

**Reviewer only Fig. 1** | (a) Scheme for patch clamp recording LPB innervating DMH neurons after activating the terminal of LPB innervating POA neurons. To do so, we simultaneously injected AAV1-hSyn-Cre into the LPB, and AAVs carrying Cre-dependent Channelrhodopsin-2 (AAV9-hSyn-DIO-ChR2-EYFP) into the POA and Cre-dependent mCherry (AAV9-DIO-mCherry) into the DMH in C57BL/6J mice. (b) Induction of EPSCs in DMH neurons by light stimulation of neural terminals in the DMH projected from LPB innervating POA neurons (c) The mean latency of the induced EPSC after photoactivation of responsive neurons. (n = 20 trials from 3 neurons). (d) The EPSC response rate of DMH neurons to light stimulation. A total of 3 responsive neurons out of 20 randomly recorded DMH neurons from 3 mice.

In our major point 2, I asked 'why both  $DMH^{V_{glut2}}$  vs.  $DMH^{V_{gat}}$  are required for cold induced defensive behavior?' The authors again proposed a possibility 'we proposed that  $DMH^{V_{glut2}}$  neurons primarily provide excitatory input to premotor neurons in the RPa to stimulate thermogenesis, while  $DMH^{V_{gat}}$  neurons may mainly suppress POA hypothalamic neurons to inhibit heat loss.' but without data to support this hypothesis. Is  $DMH^{V_{glut2}}$  neurons to RPa really stimulate thermogenesis?

R: The glutamatergic DMH-rMR/RPa projection in promoting thermogenesis has been shown before in rats and mice repetitively. For example, Kataoka et al previously determined glutamatergic DMH-rMR projection drives BAT thermogenesis in rat (6). As cited figures shown below, activation of cell bodies in the DMH by **optogenetics** and following a saline nanoinjection into the rMR (**Cited Fig. 1B** and **1C**) elicited increases in BAT SNA and  $T_{BAT}$  (**Cited Fig. 1D**). In contrast, following a subsequent nanoinjection of glutamate receptor antagonist AP5/CNQX into the rMR (**Cited Fig. 1B** and **1C**), neither BAT SNA nor  $T_{BAT}$  was increased by activation of DMH neurons (**Cited Fig. 1E**).

Machado et al also identified DHA<sup>Vglut2</sup>-RPa pathway mediate BAT thermogenesis in mice (7). They found optogenetic inhibition of the axon terminals of ArchT-GFP expressing DMH<sup>Vglut2</sup> neurons in the RPa caused a significant reduction of baseline Tc (Cited Fig. 2A and 2B).

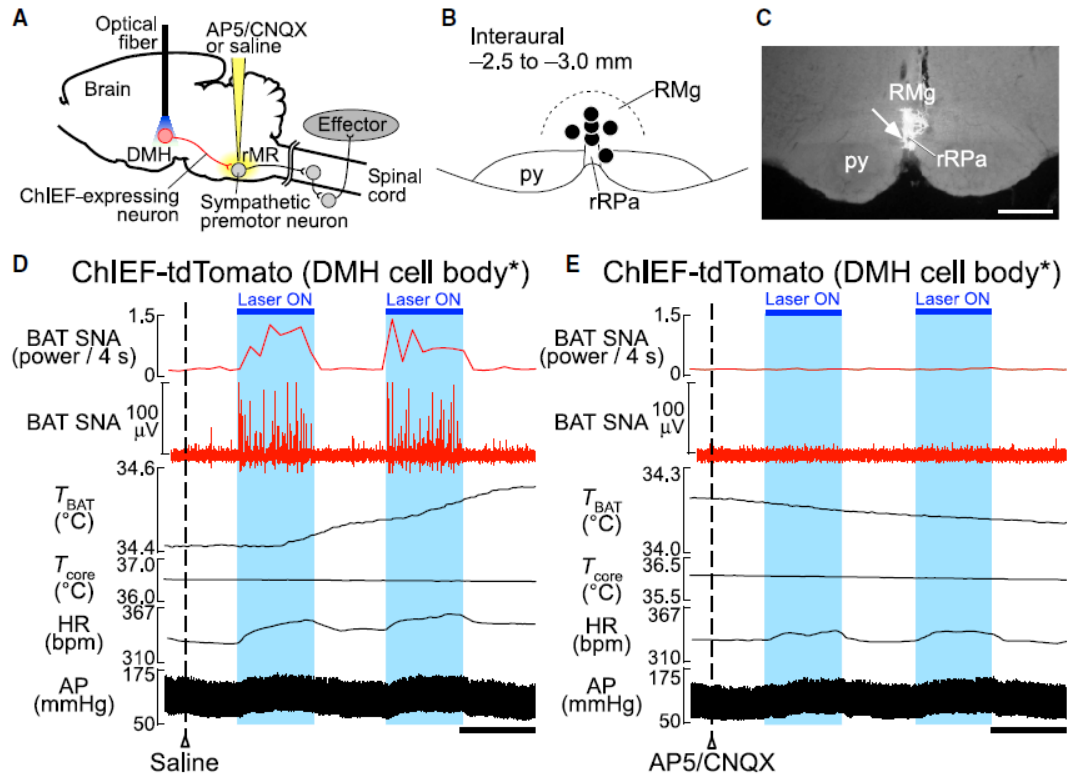

**Cited Fig. 1** | (A) In vivo experiment to examine the effect of antagonizing glutamate receptors in the rMR on physiological responses to photostimulation of DMH neurons (DMH cell body\*). (B and C) Nanoinjection sites in the rMR are mapped in (B). Each circle indicates a site of saline and AP5/CNQX injections made at the same location in each rat. The effect of saline was always tested first. Each injection site was labeled with fluorescent microspheres (arrow in [C]). Scale bar, 500  $\mu$ m. (D and E) Effect of illumination of ChIEF-tdTomato-expressing cells in the DMH on BAT thermogenic and cardiovascular activities following saline (D) or AP5/ CNQX injection (E) into the rMR. Results from the same rat are shown. Horizontal bars, 30 s.

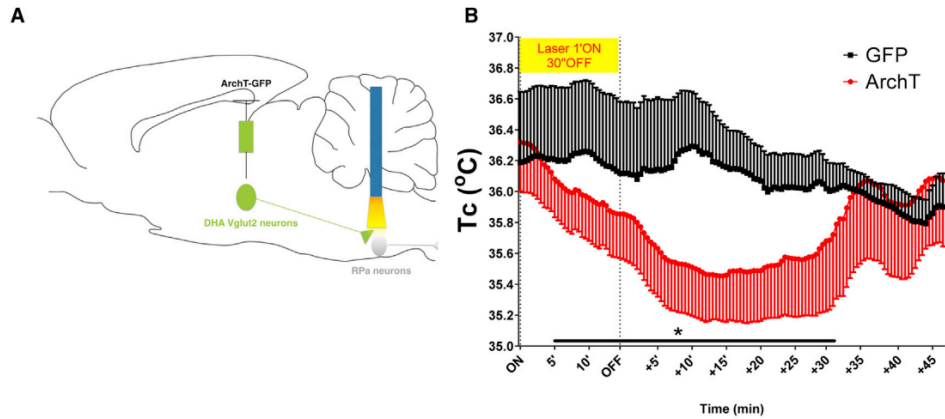

**Cited Fig. 2** | (A) A schematic figure of the protocol for inhibition of DHA VGLUT2+ fibers in the RPa using AAV-DIO-ArchT-GFP. (B) T<sub>c</sub> measurement in Vglut2-IRES-cre mice injected in the DHA bilaterally with AAV-DIO-ArchT-GFP (n = 5) or controls injected with GFP (n = 6) during optogenetic inhibition of DHA<sup>Vglut2</sup> terminals in the RPa (35.73 °C ± 0.02°C ArchT versus 36.15 °C ± 0.008 °C GFP controls during first 30 min after initiation of laser stimulation; Mann-Whitney test; ± SEM; \*p < 0.0001). The laser inhibition causes an ~1 °C fall in T<sub>c</sub> at maximum, which is about 10 min after the termination of the laser inhibition.

Nevertheless, we directly determined whether activation of the glutamatergic DMH-RPa projection would promote thermogenesis in mice. We expressed Cre-dependent ChR2 in DMH of the Vglut2-ires-Cre mice and activated the axon terminals of DMH<sup>Vglut2</sup> neurons in the RPa by blue laser (**Extended Data Fig. 10a**). Compared with the GFP control mice, activation of the terminals of ChR2-expressing DMH<sup>Vglut2</sup> neurons in the RPa significantly increased T<sub>core</sub>, yet it only slightly increased the physical activity at the beginning of laser stimulation (**Extended Data Fig. 10b,c**). Taken together, the DMH<sup>Vglut2</sup>-RPa projection is sufficiently to increase thermogenesis in mice. We added these data in **Extended Data Fig. 10a-c** and modified manuscript accordingly (lines 533-535).

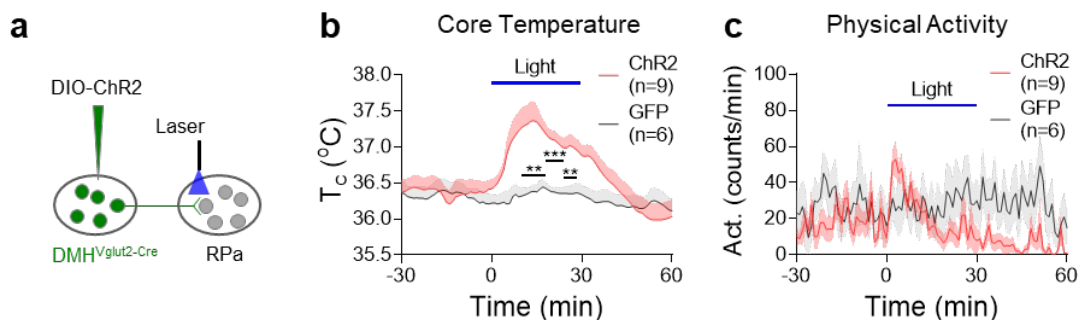

**Extended Data Fig. 10** | (a) Activating the DMH<sup>Vglut2</sup>→RPa projection via optogenetic activation of DMH<sup>Vglut2 & ChR2</sup> neural terminals in the RPa. AAVs carrying Cre-dependent ChR2 (AAV9-hEF1a-DIO-hChR2-EYFP) were injected into the DMH of Vglut2-IRES-Cre mice. An optical fiber was implanted above the RPa and used for optogenetic activation

of neural terminals. AAV9-hSyn-Flex-GFP was used as the control. (b-c) Changes of  $T_{\text{core}}$  (b) and physical activity (c) after photoactivation of DMH<sup>Vglut2 & Chr2</sup> neural terminals in the RPa (Chr2, n = 9 mice; GFP, n = 6 mice). Light pattern: 473 nm, 12 mW, 10 Hz, 10 ms, 2-s on followed by 2-s off, with the cycles repeating for 30 min.

In our major point 5, I like to see the sequencing results been validated with RNAscope staining to determining what is the best marker for the DMH-projecting LPB<sup>Vglut2</sup> neurons that is important for cold.

R: Thanks for the reviewer's interest and curiosity, we now present more data as this reviewer suggested. As we previously stated, there were few Gal-Cre<sup>+</sup> and TH<sup>+</sup> neurons in the LPB. Thus, we validated the others: N4bp2, Spint2, CCK, GRP and FoxP2 (in the order of enrichment score). However, N4bp2 was not specifically expressed in the LPB according to Allen database (**Reviewer only Fig. 2a**). Spint2 appeared to enrich in the LPB according to Allen database (**Reviewer only Fig. 2b**). Yet, no antibodies or RNAscope probes available currently. The newly synthesized probe would take 2-3 months to synthesize and it may take even longer to ship from US to China. Therefore, we prioritized the validation of CCK, GRP, and FoxP2.

These results are shown below: about 38% of DMH-projecting LPB<sup>CCK</sup> neurons were sensitive to cold exposure, accounting for 20% of cold-activated LPB neurons (**Reviewer only Fig. 2c**). And nearly 30% of DMH-projecting LPB<sup>GRP</sup> neurons were sensitive to cold exposure, accounting for 15% of cold-activated LPB neurons (**Reviewer only Fig. 2d,e**). About 60% of DMH-projecting LPB<sup>FoxP2</sup> neurons (shown as FoxP2<sup>+</sup>CTB555<sup>+</sup> (DMH-projecting)) were sensitive to cold exposure, accounting for 32% of cold-activated LPB neurons (**Reviewer only Fig. 2f**). Therefore, FoxP2 might be another good marker for the DMH-projecting LPB<sup>Vglut2</sup> neurons. However, due to the lack of FoxP2-Cre mice, we have not been able to test the functionality of the LPB<sup>FoxP2</sup>-DMH projection at this time. Thus, we didn't present these data, and would like to further test it in the future.

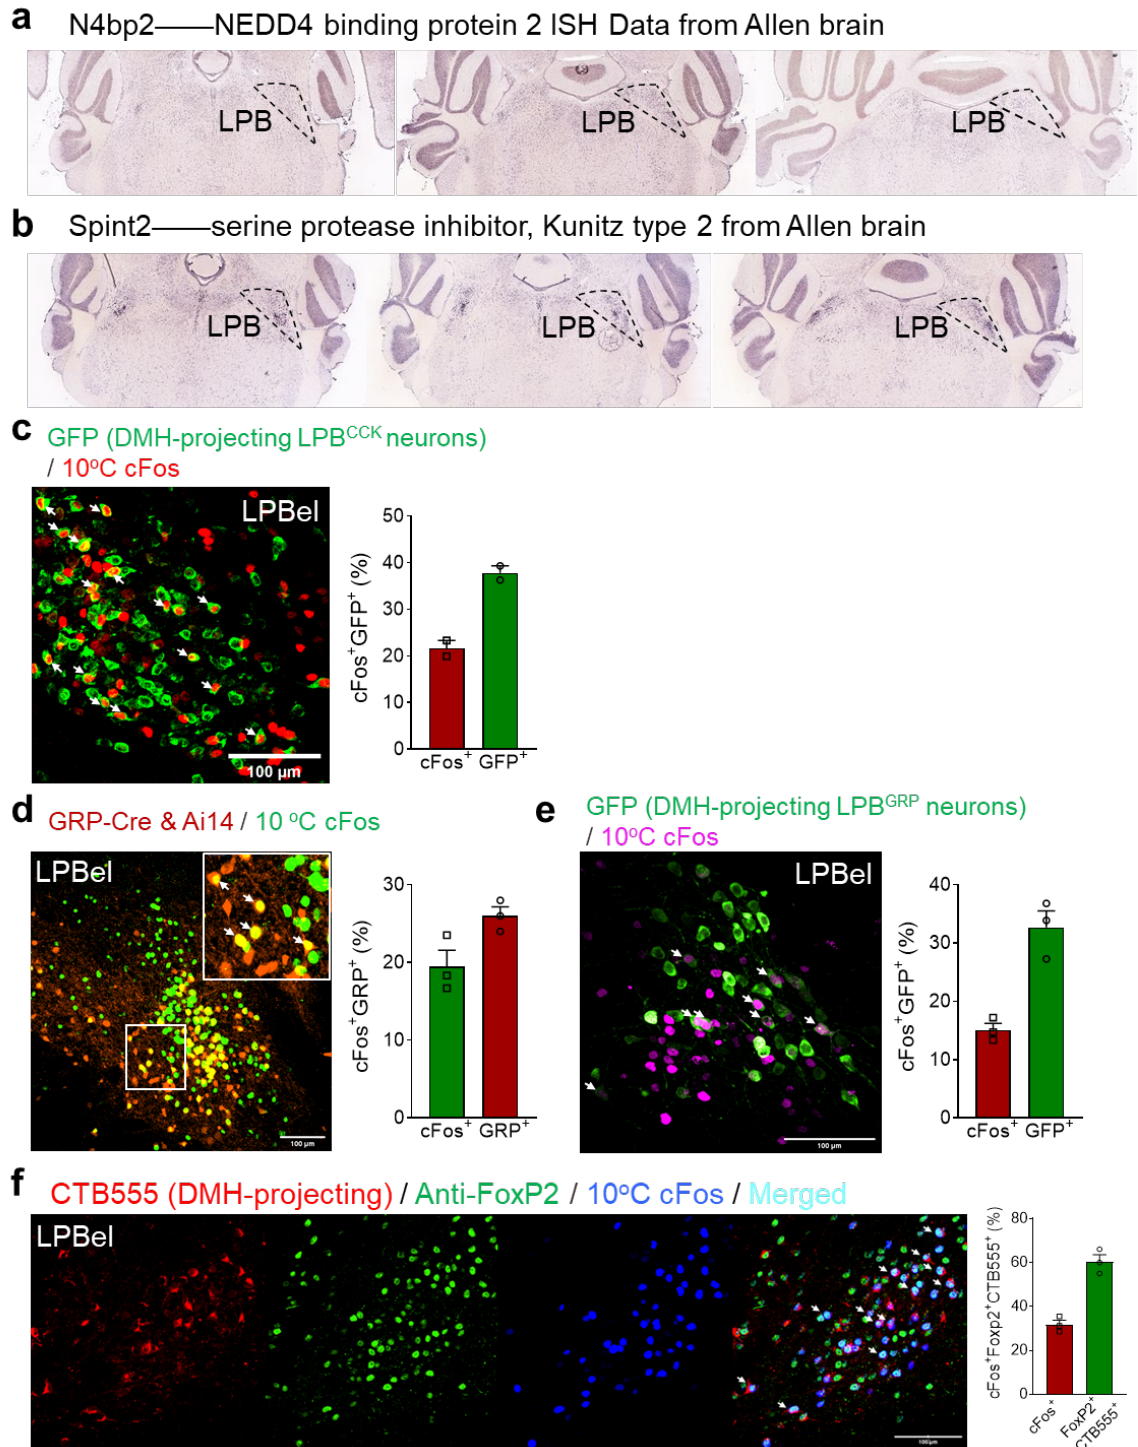

**Reviewer only Fig. 2** | (a-b) ISH data of N4bp2 (a) and Spint2 (b) from Allen brain. (c) Overlap between DMH-projecting LPB<sup>CCK</sup> neurons and cold-induced cFos (n = 2 mice). To label DMH-projecting LPB<sup>CCK</sup> neurons, we injected retrograde AAVs carrying Cre-dependent GFPL10 (AAV-Retro-CAG-Flex-GFPL10) in the DMH of CCK-IRES-Cre mice, which drove the expression of GFPL10 in the LPB. (d) Overlap between LPB<sup>GRP</sup>

neurons (labeled with GRP-Cre & Ai14) and cold-induced cFos (n = 3 mice). (e) Overlap between DMH-projecting LPB<sup>GRP</sup> neurons and cold-induced cFos (n = 3 mice). To label DMH-projecting LPB<sup>GRP</sup> neurons, we injected retrograde AAVs carrying Cre-dependent GFPL10 (AAV-Retro-CAG-Flex-GFPL10) in the DMH of GRP-IRES-Cre mice, which drove the expression of GFPL10 in the LPB. (e) Overlap between DMH-projecting LPB<sup>FoxP2</sup> neurons and cold-induced cFos (n = 3 mice). To label DMH-projecting LPB<sup>FoxP2</sup> neurons, we injected retrograde CTB555 in the DMH of C57 mice, then stained the FoxP2 in the LPB. Merged cells were indicated by white arrows. Scale bar, 100µm. LPBel, lateral parabrachial nucleus, external and lateral part.

#### Reference:

1. Z. D. Zhao *et al.*, A hypothalamic circuit that controls body temperature. *Proceedings of the National Academy of Sciences of the United States of America* **114**, 2042-2047 (2017).
2. C. L. Tan *et al.*, Warm-Sensitive Neurons that Control Body Temperature. *Cell* **167**, 47-+ (2016).
3. S. F. Morrison, K. Nakamura, Central neural pathways for thermoregulation. *Frontiers in bioscience* **16**, 74-104 (2011).
4. C. L. Tan, Z. A. Knight, Regulation of Body Temperature by the Nervous System. *Neuron* **98**, 31-48 (2018).
5. T. M. Takahashi *et al.*, A discrete neuronal circuit induces a hibernation-like state in rodents. *Nature*, (2020).
6. N. Kataoka, H. Hioki, T. Kaneko, K. Nakamura, Psychological stress activates a dorsomedial hypothalamus-medullary raphe circuit driving brown adipose tissue thermogenesis and hyperthermia. *Cell Metab* **20**, 346-358 (2014).
7. N. L. S. Machado *et al.*, A Glutamatergic Hypothalamomedullary Circuit Mediates Thermogenesis, but Not Heat Conservation, during Stress-Induced Hyperthermia. *Current biology : CB* **28**, 2291-2301 e2295 (2018).

## REVIEWERS' COMMENTS

Reviewer #2 (Remarks to the Author):

The authors successfully addressed my remaining concerns with new data and analysis. I agree with the authors on not including some of the preliminary results in this current manuscript, but I hope these new results could potentially lead to exciting discoveries in near future.



## REVIEWERS' COMMENTS

Reviewer #2 (Remarks to the Author):

The authors successfully addressed my remaining concerns with new data and analysis. I agree with the authors on not including some of the preliminary results in this current manuscript, but I hope these new results could potentially lead to exciting discoveries in near future.

R: We are grateful for this reviewer's recognition and happy to do something that could lead to new exciting discoveries in near future.
